# Supplementary material for: Evaluation of multi-assay algorithms for identifying individuals with recent HIV infection: HPTN 071 (PopART)
Source: PLoS One. 2021 Dec 17;16(12):e0258644. doi: 10.1371/journal.pone.0258644 (PMC8682874; doi:10.1371/journal.pone.0258644)
Supplement: S1 Dataset — (XLSX) [file pone.0258644.s004.xlsx]

## Sheet: Sheet1
Participant	Duration (years)	Viral Load (copies/mL)	LAg Avidity (OD-n)	BR Wash Abs	BR DEA Abs	BR (AI)	Asante	ARV Drugs Detected	Study Arm	Age	Gender	Country
SC_1	<1	30810	3.88	3.07	3.4	90.32	LT	No	Arm C	25+	Male	South Africa
SC_2	<1	1650	4.48	3.4	3.58	95.02	LT	No	Arm C	25+	Female	South Africa
SC_3	<1	95530	2.34	1	3.26	30.54	LT	No	Arm C	18-24	Female	South Africa
SC_4	<1	16450	0.17	0.47	2.41	19.67	Recent	No	Arm C	25+	Male	South Africa
SC_5	<1	<400	1.25	0.75	3.37	22.29	Recent	Yes	Arm B	25+	Female	South Africa
SC_6	<1	7230	1.31	1.78	3.47	51.21	Recent	No	Arm C	25+	Female	South Africa
SC_7	<1	1030	0.95	2.84	3.27	86.83	Recent	No	Arm C	25+	Female	South Africa
SC_8	<1	1691650	0.07	0.25	0.68	36.77	Negative	No	Arm C	25+	Female	South Africa
SC_9	<1	<400	0.55	1.95	3.1	62.85	Negative	Yes	Arm B	25+	Female	South Africa
SC_10	<1	4740	1.6	3.05	3.56	85.64	LT	No	Arm B	25+	Female	South Africa
SC_11	<1	663740	1.35	0.37	1.89	19.4	Recent	No	Arm B	18-24	Female	South Africa
SC_12	<1	15600	5.13	2.22	3.34	66.56	LT	No	Arm C	25+	Female	South Africa
SC_13	<1	<400	4.88	3.42	3.39	100.83	LT	Yes	Arm C	25+	Female	South Africa
SC_14	<1	49140	0.76	0.75	2.53	29.82	Recent	No	Arm B	18-24	Female	South Africa
SC_15	<1	870	2.74	1.85	3.14	58.85	LT	No	Arm A	18-24	Female	South Africa
SC_16	<1	7180	2.87	2.52	3.34	75.54	LT	No	Arm A	25+	Female	South Africa
SC_17	<1	7900	1.27	0.28	0.99	27.72	LT	No	Arm A	25+	Female	South Africa
SC_18	<1	23220	0.45	0.37	2.55	14.54	Recent	No	Arm A	18-24	Female	South Africa
SC_19	<1	<400	1.81	1.46	3.08	47.4	Recent	No	Arm C	18-24	Female	South Africa
SC_20	<1	<400	0.45	0.8	1.74	46.2	Recent	Yes	Arm C	25+	Female	South Africa
SC_21	<1	68310	0.77	0.24	0.42	57.86	Recent	No	Arm C	25+	Female	South Africa
SC_22	<1	1160	0.83	0.96	3.44	27.89	Recent	No	Arm C	25+	Female	South Africa
SC_23	<1	<400	0.17	0.41	1.87	22.07	Recent	Yes	Arm B	25+	Female	South Africa
SC_24	<1	16910	2.7	3.23	3.36	96.08	LT	No result	Arm A	25+	Female	South Africa
SC_25	<1	<400	1.04	1.13	2.87	39.28	LT	Yes	Arm A	25+	Female	South Africa
SC_26	<1	11300	5	3.39	3.58	94.7	LT	No	Arm A	18-24	Female	South Africa
SC_27	<1	<400	2.38	3.09	3.28	94.1	Recent	Yes	Arm A	25+	Female	South Africa
SC_28	<1	148780	2.8	1.42	3.28	43.29	LT	No	Arm B	25+	Female	South Africa
SC_29	<1	<400	3.21	3.33	3.36	99.21	LT	No	Arm B	25+	Male	South Africa
SC_30	<1	27390	2.17	3.27	3.5	93.41	Recent	No	Arm B	25+	Female	South Africa
SC_31	<1	26990	3.31	3.18	3.36	94.54	LT	No	Arm C	25+	Male	South Africa
SC_32	<1	<400	0.92	0.72	2.97	24.31	Recent	Yes	Arm C	25+	Female	South Africa
SC_33	<1	54530	1.35	0.43	1.2	35.57	LT	No	Arm C	18-24	Female	South Africa
SC_34	<1	3580	1.38	0.41	1.29	31.68	LT	No	Arm C	25+	Female	South Africa
SC_35	<1	123730	0.36	0.22	1.71	12.98	Recent	No	Arm C	18-24	Female	South Africa
SC_36	<1	<400	3.05	2.5	3.3	75.85	LT	No	Arm B	25+	Female	South Africa
SC_37	<1	94800	1.67	0.67	3.29	20.36	Recent	No	Arm C	25+	Female	South Africa
SC_38	<1	<400	2.68	1.39	3.26	42.67	LT	No	Arm A	18-24	Female	South Africa
SC_39	<1	24230	1.94	0.75	2.27	33.12	LT	No	Arm A	18-24	Female	South Africa
SC_40	<1	7060	4.19	3.12	3.39	91.99	LT	No	Arm A	18-24	Female	South Africa
SC_41	<1	41670	0.68	0.25	1.05	24.18	Recent	No	Arm B	25+	Female	South Africa
SC_42	<1	<400	0.17	0.23	0.38	59.71	Recent	No	Arm B	25+	Female	South Africa
SC_43	<1	1630	1.79	0.65	2.44	26.79	Recent	No	Arm C	25+	Male	South Africa
SC_44	<1	18260	3.91	3.06	3.3	92.73	LT	No	Arm B	18-24	Female	South Africa
SC_45	<1	<400	0.1	0.66	0.9	73.26	Negative	Yes	Arm C	18-24	Female	South Africa
SC_46	<1	<400	0.15	1.04	1.57	66.13	Negative	Yes	Arm A	18-24	Male	South Africa
SC_47	<1	8930	3.78	3.35	3.56	94.18	LT	No	Arm A	18-24	Female	South Africa
SC_48	<1	28070	0.61	0.37	0.93	39.73	Recent	No	Arm B	25+	Female	South Africa
SC_49	<1	36450	2.41	0.66	2.14	30.88	LT	No	Arm A	25+	Female	South Africa
SC_50	<1	<400	0.81	2.95	3.25	90.82	Recent	Yes	Arm C	25+	Female	South Africa
SC_51	<1	<400	1.49	2.01	3.52	56.95	Recent	Yes	Arm C	25+	Female	South Africa
SC_52	<1	11860	2.13	2.5	3.32	75.21	LT	No	Arm C	18-24	Female	South Africa
SC_53	<1	4260	0.56	1.07	2.26	47.21	Recent	No result	Arm A	25+	Female	South Africa
SC_54	<1	<400	0.76	2.25	3.31	68.03	Negative	Yes	Arm B	25+	Female	South Africa
SC_55	<1	<400	0.75	1.54	3.28	47.09	Recent	Yes	Arm B	25+	Female	South Africa
SC_56	<1	229980	0.29	0.26	0.91	28.62	Recent	No	Arm B	18-24	Female	South Africa
SC_57	<1	20500	1.3	0.36	1.52	23.71	LT	No	Arm B	18-24	Female	South Africa
SC_58	<1	20260	3.24	3.32	3.31	100.2	LT	No	Arm B	25+	Female	South Africa
SC_59	<1	37150	4.3	3.35	3.58	93.51	LT	No	Arm A	18-24	Female	South Africa
SC_60	<1	<400	1.67	1.25	2.34	53.7	Recent	Yes	Arm A	25+	Female	South Africa
SC_61	<1	60000	0.5	0.23	0.58	40.29	LT	No	Arm A	25+	Female	South Africa
SC_62	<1	2340	2.19	1.96	3.36	58.42	LT	Yes	Arm B	18-24	Female	South Africa
SC_63	<1	17200	2.83	3.18	3.6	88.46	Recent	No	Arm A	18-24	Female	South Africa
SC_64	<1	<400	0.41	0.51	1.15	44.38	Recent	Yes	Arm B	25+	Female	South Africa
SC_65	<1	<400	4.26	3.32	3.34	99.44	LT	No	Arm B	25+	Female	South Africa
SC_66	<1	2760	1	1.52	3.14	48.26	LT	No	Arm C	25+	Female	South Africa
SC_67	<1	820	0.23	0.32	1.23	26.36	Recent	No	Arm B	18-24	Female	South Africa
SC_68	<1	86340	2.07	1.42	2.81	50.69	LT	No	Arm C	18-24	Female	South Africa
SC_69	<1	36450	3.6	3.36	3.41	98.59	LT	No result	Arm C	18-24	Female	South Africa
SC_70	<1	19050	3.79	3.33	3.39	98.21	LT	No	Arm A	25+	Female	South Africa
SC_71	<1	8930	2.49	2.74	3.56	76.81	LT	No	Arm A	25+	Female	South Africa
SC_72	<1	22440	3.11	2.76	3.35	82.42	LT	No	Arm A	18-24	Female	South Africa
SC_73	<1	6030	2.65	3.34	3.57	93.42	LT	No	Arm A	18-24	Female	South Africa
SC_74	<1	7790	4.86	3.36	3.37	99.9	LT	No	Arm A	25+	Female	South Africa
SC_75	<1	<400	3.27	3.27	3.59	91.2	LT	No	Arm B	25+	Female	South Africa
SC_76	<1	84270	1.22	0.66	1.77	37.46	Recent	No	Arm C	25+	Female	South Africa
SC_77	<1	8710	2.96	3.25	3.38	96.37	LT	No	Arm C	18-24	Female	South Africa
SC_78	<1	98560	2.71	3.43	3.42	100.22	LT	No	Arm C	25+	Female	South Africa
SC_79	<1	<400	0.96	2.86	3.51	81.37	Recent	Yes	Arm B	25+	Female	South Africa
SC_80	<1	27930	0.53	0.73	3.15	23.11	LT	No	Arm A	18-24	Female	South Africa
SC_81	<1	<400	0.92	3.2	3.33	95.89	Recent	Yes	Arm A	18-24	Female	South Africa
SC_82	<1	2900	5.11	3.41	3.39	100.67	LT	No	Arm B	18-24	Female	South Africa
SC_83	<1	30560	0.94	0.7	3.33	21.1	Recent	No	Arm B	25+	Female	South Africa
SC_84	<1	<400	0.86	2.24	3.1	72.43	Recent	No result	Arm B	18-24	Female	South Africa
SC_85	<1	1940	1.5	2.27	3.3	68.82	Recent	Yes	Arm B	18-24	Female	South Africa
SC_86	<1	<400	5.21	3.43	3.42	100.35	LT	Yes	Arm A	25+	Female	South Africa
SC_87	<1	59430	2.1	3.19	3.59	88.71	Recent	No	Arm A	25+	Male	South Africa
SC_88	<1	79930	2.25	3.06	3.32	92.09	LT	No	Arm C	25+	Female	South Africa
SC_89	<1	<400	4.34	3.32	3.34	99.59	LT	Yes	Arm A	25+	Female	Zambia
SC_90	<1	67120	0.83	1.8	3.24	55.56	Recent	No	Arm B	18-24	Female	Zambia
SC_91	<1	28600	3.83	3.12	3.61	86.49	LT	No	Arm A	18-24	Male	Zambia
SC_92	<1	11070	1.02	3.17	3.35	94.64	Recent	No	Arm A	25+	Male	Zambia
SC_93	<1	<400	1.08	1.06	3.48	30.63	Recent	Yes	Arm A	25+	Female	Zambia
SC_94	<1	34040	3.62	3.43	3.38	101.41	LT	No	Arm C	18-24	Female	Zambia
SC_95	<1	6380	0.91	0.57	2.52	22.62	Recent	No	Arm C	18-24	Female	Zambia
SC_96	<1	9510	0.56	0.46	2.23	20.48	Recent	No	Arm C	18-24	Female	Zambia
SC_97	<1	9120	2.55	3.31	3.57	92.69	Recent	No	Arm C	18-24	Female	Zambia
SC_98	<1	73800	1.15	0.52	2.26	22.77	Recent	No	Arm C	18-24	Female	Zambia
SC_99	<1	84830	0.42	0.32	1.38	23.33	Recent	No	Arm C	25+	Female	Zambia
SC_100	<1	36130	1.8	0.56	3.06	18.38	LT	No	Arm B	18-24	Male	Zambia
SC_101	<1	26410	1.06	0.53	3.2	16.68	LT	No	Arm C	25+	Female	Zambia
SC_102	<1	31990	2.01	0.52	1.73	29.99	Recent	No	Arm C	25+	Male	Zambia
SC_103	<1	116190	4.49	3.32	3.33	99.67	LT	No	Arm B	18-24	Female	Zambia
SC_104	<1	63490	0.2	0.42	2.66	15.95	Recent	No	Arm C	25+	Female	Zambia
SC_105	<1	<400	5	3.37	3.59	93.78	LT	Yes	Arm C	25+	Female	Zambia
SC_106	<1	<400	0.87	1.35	2.98	45.2	Recent	Yes	Arm C	18-24	Female	Zambia
SC_107	<1	80780	3.14	1.64	3.24	50.5	LT	No	Arm B	25+	Female	Zambia
SC_108	<1	113220	0.91	0.39	2.12	18.6	Recent	No	Arm C	25+	Female	Zambia
SC_109	<1	<400	3.06	3.19	3.59	88.92	LT	Yes	Arm C	25+	Female	Zambia
SC_110	<1	670	1.16	0.7	2.59	27.18	LT	Yes	Arm C	25+	Female	Zambia
SC_111	<1	9140	2.7	3.06	3.3	92.87	LT	No	Arm A	18-24	Female	Zambia
SC_112	<1	436640	0.19	0.94	3.05	30.79	Recent	No	Arm A	25+	Female	Zambia
SC_113	<1	241250	0.74	0.25	1.07	23.02	Recent	No	Arm A	25+	Male	Zambia
SC_114	<1	44590	2.36	2.4	3.28	73.21	LT	No	Arm A	25+	Female	Zambia
SC_115	<1	163550	1.24	0.5	2.06	24.23	LT	No result	Arm A	25+	Female	Zambia
SC_116	<1	6660	4.57	2.07	3.35	61.89	LT	No	Arm B	25+	Female	Zambia
SC_117	<1	<400	4.28	3.13	3.58	87.47	LT	Yes	Arm B	18-24	Female	Zambia
SC_118	<1	470	0.45	0.37	0.83	44.9	LT	No	Arm C	25+	Female	Zambia
SC_119	<1	<400	1.15	2.58	3.14	82.27	Recent	Yes	Arm A	25+	Female	Zambia
SC_120	<1	8960	3.08	3.34	3.33	100.16	LT	No	Arm A	18-24	Female	Zambia
SC_121	<1	25660	2.85	3.34	3.59	93.11	LT	No	Arm B	18-24	Female	Zambia
SC_122	<1	<400	0.79	3.14	3.24	97.17	Recent	Yes	Arm B	18-24	Female	Zambia
SC_123	<1	64640	3.88	2.34	3.33	70.36	LT	No	Arm C	18-24	Male	Zambia
SC_124	<1	46860	0.57	0.28	1.04	27.18	LT	No	Arm B	18-24	Female	Zambia
SC_125	<1	46410	1.84	0.34	1.56	21.87	LT	No	Arm A	25+	Male	Zambia
SC_126	<1	532350	2.06	1.3	2.92	44.32	LT	No	Arm A	18-24	Female	Zambia
SC_127	<1	2240	2.27	3.24	3.34	97.17	LT	No	Arm B	18-24	Female	Zambia
SC_128	<1	<400	4.91	3.4	3.38	100.67	LT	Yes	Arm C	25+	Male	Zambia
SC_129	<1	24230	0.63	0.69	2.91	23.78	Recent	No	Arm C	25+	Female	Zambia
SC_130	<1	6560	1.47	1.05	3.02	34.87	LT	No	Arm A	25+	Female	Zambia
SC_131	<1	7360	0.55	0.25	1.42	17.52	Recent	No	Arm A	18-24	Female	Zambia
SC_132	<1	94880	2.15	2.31	3.29	70.22	LT	No	Arm A	25+	Female	Zambia
SC_133	<1	64800	4.82	1.01	3.52	28.57	LT	No	Arm B	18-24	Female	Zambia
SC_134	<1	68890	3.37	3.34	3.34	99.93	LT	No	Arm A	25+	Female	Zambia
SC_135	<1	7300	0.12	0.24	0.77	30.51	Recent	No	Arm C	18-24	Female	Zambia
SC_136	<1	662560	4.49	2.87	3.38	85.06	LT	No	Arm C	25+	Female	Zambia
SC_137	<1	225330	0.46	0.3	0.86	35.18	LT	No	Arm B	25+	Male	Zambia
SC_138	<1	640	3.45	3.3	3.36	97.98	LT	No	Arm A	18-24	Female	Zambia
SC_139	<1	<400	0.32	0.28	2.25	12.6	Recent	No	Arm A	18-24	Female	Zambia
SC_140	<1	183060	1.74	1.71	3.12	54.87	Recent	No	Arm A	18-24	Male	Zambia
SC_141	<1	<400	0.37	1.75	3.08	56.71	Recent	No	Arm A	18-24	Male	Zambia
SC_142	<1	<400	0.12	0.27	0.46	59.11	Recent	Yes	Arm C	18-24	Female	Zambia
SC_143	<1	<400	0.3	0.32	0.79	40.12	Recent	Yes	Arm C	25+	Female	Zambia
SC_144	<1	14220	4.21	3.47	3.37	102.85	LT	No	Arm A	18-24	Male	Zambia
SC_145	<1	87110	0.19	0.22	0.45	47.61	Recent	No	Arm A	18-24	Male	Zambia
SC_146	<1	79310	2.07	3.4	3.39	100.36	LT	No	Arm B	25+	Male	Zambia
SC_147	<1	124270	4.18	3.06	3.54	86.34	LT	No	Arm C	25+	Female	Zambia
SC_148	<1	174760	0.4	0.31	0.65	48.08	Recent	No	Arm C	25+	Female	Zambia
SC_149	<1	1760	2.75	3.32	3.57	93.05	LT	No	Arm B	25+	Female	Zambia
SC_150	<1	7850	1.28	1.51	3.17	47.62	Recent	No	Arm B	18-24	Female	Zambia
SC_151	<1	3750	1.13	1.7	3.38	50.38	Recent	No	Arm C	18-24	Male	Zambia
SC_152	<1	42570	2.76	3.3	3.34	98.69	LT	No	Arm C	18-24	Female	Zambia
SC_153	<1	46490	2.3	3.33	3.4	98.04	LT	No	Arm B	18-24	Female	Zambia
SC_154	<1	<400	3.55	3.4	3.4	99.93	LT	No	Arm C	25+	Female	Zambia
SC_155	<1	400030	3.52	3.15	3.59	87.86	LT	No	Arm C	25+	Female	Zambia
SC_156	<1	1690	1.39	3.1	3.31	93.65	Recent	No	Arm C	25+	Female	Zambia
SC_157	<1	561250	1.4	0.51	1.51	33.58	LT	No	Arm C	25+	Female	Zambia
SC_158	<1	<400	1.11	2.6	3.31	78.69	Recent	Yes	Arm C	25+	Female	Zambia
SC_159	<1	<400	0.35	0.24	0.43	55.27	Recent	Yes	Arm B	25+	Female	Zambia
SC_160	<1	21860	0.42	0.27	0.33	79.47	LT	No	Arm B	25+	Female	Zambia
SC_161	<1	2920	1.29	0.75	2.02	37.24	LT	Yes	Arm A	25+	Female	Zambia
SC_162	<1	280200	2.82	3.39	3.41	99.42	LT	No	Arm A	25+	Female	Zambia
SC_163	<1	130920	4.09	3.36	3.6	93.24	LT	No	Arm C	25+	Male	Zambia
SC_164	<1	49340	2.57	1.32	3.09	42.74	LT	No	Arm C	18-24	Female	Zambia
SC_165	<1	62950	0.28	0.26	0.62	41.6	Recent	No	Arm C	25+	Male	Zambia
SC_166	<1	1623920	0.2	0.24	1.09	21.74	Recent	No	Arm C	25+	Male	Zambia
SC_167	<1	347960	2.72	1.14	3.44	33.11	LT	No	Arm A	18-24	Female	Zambia
SC_168	<1	90920	0.13	0.29	0.66	44.56	Recent	No	Arm A	25+	Female	Zambia
SC_169	<1	143390	2.12	0.69	3.29	21.12	LT	No	Arm A	25+	Female	Zambia
SC_170	<1	22980	1.11	0.29	1.41	20.52	LT	No	Arm A	18-24	Female	Zambia
SC_171	<1	<400	4.41	3.1	3.57	87.02	LT	Yes	Arm C	25+	Female	Zambia
SC_172	<1	113570	3.29	3.3	3.3	100.07	LT	No	Arm A	25+	Female	Zambia
SC_173	<1	8390	2.16	2.71	3.28	82.42	LT	No	Arm A	18-24	Female	Zambia
SC_174	<1	32350	4.43	1.88	3.36	56.04	LT	No	Arm B	25+	Female	Zambia
SC_175	<1	6070	4.17	3.31	3.58	92.44	LT	No	Arm B	25+	Female	Zambia
SC_176	<1	54410	4.38	3.35	3.33	100.4	LT	No	Arm A	25+	Female	Zambia
SC_177	<1	22090	1.95	0.57	2.74	20.99	LT	No	Arm A	18-24	Male	Zambia
SC_178	<1	<400	1.7	1.79	3.28	54.63	Recent	No	Arm B	25+	Female	Zambia
SC_179	<1	<400	2.1	1.57	3.58	43.91	LT	Yes	Arm A	25+	Female	Zambia
SC_180	<1	<400	1.49	1.91	3.27	58.48	Recent	Yes	Arm A	25+	Female	Zambia
SC_181	<1	430	2.62	3.16	3.3	95.83	LT	No	Arm C	25+	Female	Zambia
SC_182	<1	27280	4.28	1.29	3.29	39.14	LT	No	Arm C	25+	Female	Zambia
SC_183	<1	59780	4.55	3.26	3.62	90.11	LT	No	Arm B	18-24	Female	Zambia
SC_184	<1	33020	0.1	0.2	0.39	51.36	Recent	No	Arm B	18-24	Female	Zambia
SC_185	<1	13080	5.12	3.37	3.56	94.69	LT	No	Arm B	18-24	Female	Zambia
SC_186	<1	3660	2.01	1.92	3.34	57.58	Recent	No	Arm B	18-24	Female	Zambia
SC_187	<1	43710	2.17	3.06	3.55	86.41	Recent	No result	Arm C	25+	Male	Zambia
SC_188	<1	17640	0.95	0.45	1.71	26.06	LT	No	Arm C	18-24	Female	Zambia
SC_189	<1	1860	2.15	1.55	3.47	44.49	Recent	No	Arm B	25+	Female	Zambia
SC_190	<1	36070	1.04	2.91	3.31	87.74	Recent	No	Arm C	25+	Female	Zambia
SC_191	<1	18890	3.9	3.37	3.41	98.74	LT	No	Arm C	25+	Female	Zambia
SC_192	<1	<400	1.3	3.38	3.38	99.87	Recent	Yes	Arm C	25+	Female	Zambia
SC_193	<1	90470	2.51	1.19	3.57	33.24	LT	No	Arm C	18-24	Female	Zambia
SC_194	<1	602370	0.47	0.28	1.4	19.82	LT	No	Arm A	25+	Male	Zambia
SC_195	<1	<400	0.49	0.38	1.82	20.96	Recent	Yes	Arm B	25+	Female	Zambia
SC_196	<1	<400	4.28	3.3	3.31	99.46	LT	Yes	Arm C	25+	Female	Zambia
SC_197	<1	36310	2.52	3.13	3.55	88.38	LT	No	Arm C	18-24	Female	Zambia
SC_198	<1	5500	0.92	1.3	3.03	42.93	Recent	No	Arm A	25+	Female	Zambia
SC_199	<1	<400	1.14	2.29	3.32	68.81	Recent	Yes	Arm A	18-24	Female	Zambia
SC_200	<1	39700	5.81	3.4	3.39	100.37	LT	No	Arm A	25+	Female	Zambia
SC_201	<1	<400	0.61	3.22	3.54	90.84	Recent	Yes	Arm C	25+	Female	Zambia
SC_202	<1	479130	0.07	0.47	1.52	31.21	Recent	No	Arm B	25+	Male	Zambia
SC_203	<1	<400	1.62	3.29	3.31	99.32	Recent	No	Arm B	18-24	Female	Zambia
SC_204	<1	<400	0.13	0.73	1.25	58.37	Recent	Yes	Arm B	18-24	Female	Zambia
SC_205	<1	<400	2.67	3.07	3.56	86.24	LT	Yes	Arm A	18-24	Female	Zambia
SC_206	<1	2320190	1.95	0.5	2.16	23.39	LT	Yes	Arm A	25+	Female	Zambia
SC_207	<1	9440	0.16	0.18	0.18	97.52	Recent	No	Arm A	25+	Female	Zambia
SC_208	<1	<400	3.56	3.4	3.39	100.23	LT	Yes	Arm A	25+	Female	Zambia
SC_209	<1	<400	3.62	2.61	3.56	73.32	LT	Yes	Arm C	25+	Female	Zambia
SC_210	<1	<400	1.99	3.41	3.35	101.68	LT	Yes	Arm C	18-24	Male	Zambia
SC_211	<1	2290	4.11	3.28	3.3	99.15	LT	No	Arm A	18-24	Female	Zambia
SC_212	<1	9890	3.85	3.33	3.35	99.28	LT	No	Arm A	18-24	Female	Zambia
SC_213	<1	68320	5.46	2.69	3.58	75.31	LT	No	Arm C	25+	Female	Zambia
SC_214	<1	<400	5.99	3.42	3.35	102.14	LT	Yes	Arm A	25+	Female	Zambia
SC_215	<1	<400	0.5	0.51	1.05	48.43	Recent	Yes	Arm A	18-24	Female	Zambia
SC_216	<1	37040	4.07	3.26	3.39	96.21	LT	No	Arm C	25+	Female	Zambia
SC_217	<1	<400	4.8	3.41	3.61	94.36	LT	No	Arm C	18-24	Female	Zambia
SC_218	<1	14020	3.6	3.41	3.31	103.23	LT	No	Arm A	25+	Male	Zambia
SC_219	<1	<400	4.03	3.28	3.34	98.45	LT	Yes	Arm C	25+	Female	Zambia
SC_220	<1	<400	5.33	3.35	3.36	99.73	LT	Yes	Arm B	18-24	Female	Zambia
