# Supplementary material for: Evaluation of multi-assay algorithms for identifying individuals with recent HIV infection: HPTN 071 (PopART)
Source: PLoS One. 2021 Dec 17;16(12):e0258644. doi: 10.1371/journal.pone.0258644 (PMC8682874; doi:10.1371/journal.pone.0258644)
Supplement: S2 Dataset — (XLSX) [file pone.0258644.s005.xlsx]

## Sheet: Sheet 1
Participant	Duration (years)	Viral Load (copies/mL)	LAg Avidity (OD-n)	BR Wash Abs	BR DEA Abs	BR (AI)	Asante
NSC_1	>2	<400	4.62	3.4	3.4	100.01	n/a (VL <1000)
NSC_2	>2	<400	0.6	2.93	3.36	87.15	n/a (VL <1000)
NSC_3	>2	<400	4.98	3.4	3.45	98.47	n/a (VL <1000)
NSC_4	>2	<400	5.25	3.42	3.43	99.77	n/a (VL <1000)
NSC_5	>2	<400	1.22	3.45	3.45	99.83	n/a (VL <1000)
NSC_6	>2	<400	5.66	3.42	3.42	100.09	n/a (VL <1000)
NSC_7	>2	<400	4.87	3.39	3.62	93.81	n/a (VL <1000)
NSC_8	>2	<400	2.65	3.36	3.45	97.37	n/a (VL <1000)
NSC_9	>2	<400	4.85	2.43	3.39	71.9	n/a (VL <1000)
NSC_10	>2	<400	5.52	3.4	3.63	93.68	n/a (VL <1000)
NSC_11	>2	<400	2.42	3.41	3.47	98.3	n/a (VL <1000)
NSC_12	>2	<400	4.56	3.41	3.38	100.6	n/a (VL <1000)
NSC_13	>2	<400	4.97	3.39	3.39	100.06	n/a (VL <1000)
NSC_14	>2	<400	2.74	3.49	3.42	102.16	n/a (VL <1000)
NSC_15	>2	<400	5.12	3.39	3.63	93.18	n/a (VL <1000)
NSC_16	>2	<400	2.01	3.4	3.39	100.42	n/a (VL <1000)
NSC_17	>2	<400	3.07	3.39	3.43	98.91	n/a (VL <1000)
NSC_18	>2	<400	2.82	3.44	3.4	101.23	n/a (VL <1000)
NSC_19	>2	<400	5.07	3.44	3.38	101.6	n/a (VL <1000)
NSC_20	>2	<400	2.51	3.2	3.61	88.74	n/a (VL <1000)
NSC_21	>2	<400	4.1	3.46	3.42	101.06	n/a (VL <1000)
NSC_22	>2	<400	1.28	3.41	3.31	103.1	n/a (VL <1000)
NSC_23	>2	<400	4.2	3.44	3.36	102.25	n/a (VL <1000)
NSC_24	>2	<400	2.53	3.37	3.35	100.72	n/a (VL <1000)
NSC_25	>2	<400	5.16	3.42	3.71	92.06	n/a (VL <1000)
NSC_26	>2	<400	4.7	3.44	3.42	100.61	n/a (VL <1000)
NSC_27	>2	<400	5.03	3.41	3.41	99.88	n/a (VL <1000)
NSC_28	>2	<400	5.06	3.42	3.43	99.68	n/a (VL <1000)
NSC_29	>2	<400	4.72	3.42	3.65	93.75	n/a (VL <1000)
NSC_30	>2	<400	5.59	3.51	3.4	103.43	n/a (VL <1000)
NSC_31	>2	<400	3.15	3.38	3.39	99.53	n/a (VL <1000)
NSC_32	>2	<400	1.28	3.38	3.34	101.34	n/a (VL <1000)
NSC_33	>2	<400	1.1	3.33	3.33	100.04	n/a (VL <1000)
NSC_34	>2	<400	2.93	3.38	3.36	100.7	n/a (VL <1000)
NSC_35	>2	<400	2.58	3.42	3.66	93.42	n/a (VL <1000)
NSC_36	>2	<400	5.13	3.51	3.42	102.7	n/a (VL <1000)
NSC_37	>2	<400	5.17	3.41	3.39	100.73	n/a (VL <1000)
NSC_38	>2	<400	2.26	3.29	3.35	98.09	n/a (VL <1000)
NSC_39	>2	<400	2.09	3.34	3.35	99.72	n/a (VL <1000)
NSC_40	>2	<400	5.14	3.23	3.39	95.29	n/a (VL <1000)
NSC_41	>2	<400	1.77	3.37	3.39	99.35	n/a (VL <1000)
NSC_42	>2	<400	0.83	1.57	2.5	62.85	n/a (VL <1000)
NSC_43	>2	<400	3.92	3.42	3.61	94.91	n/a (VL <1000)
NSC_44	>2	<400	3.67	3.42	3.4	100.54	n/a (VL <1000)
NSC_45	>2	<400	4.72	3.41	3.59	94.9	n/a (VL <1000)
NSC_46	>2	<400	1.57	3.15	3.3	95.64	n/a (VL <1000)
NSC_47	>2	<400	3.08	3.39	3.38	100.4	n/a (VL <1000)
NSC_48	>2	<400	5.1	3.44	3.6	95.61	n/a (VL <1000)
NSC_49	>2	<400	5.67	3.4	3.64	93.3	n/a (VL <1000)
NSC_50	>2	<400	5.4	3.36	3.39	99.17	n/a (VL <1000)
NSC_51	>2	<400	2.27	3.47	3.46	100.25	n/a (VL <1000)
NSC_52	>2	<400	4.43	3.41	3.38	100.81	n/a (VL <1000)
NSC_53	>2	<400	4.77	3.45	3.44	100.31	n/a (VL <1000)
NSC_54	>2	<400	5.3	3.42	3.61	94.8	n/a (VL <1000)
NSC_55	>2	<400	5.33	3.42	3.39	100.99	n/a (VL <1000)
NSC_56	>2	<400	1.9	3.36	3.39	98.88	n/a (VL <1000)
NSC_57	>2	<400	4.72	3.5	3.41	102.68	n/a (VL <1000)
NSC_58	>2	<400	0.61	1.78	3.31	53.82	n/a (VL <1000)
NSC_59	>2	<400	4.15	3.42	3.63	94.28	n/a (VL <1000)
NSC_60	>2	<400	5.45	3.43	3.41	100.52	n/a (VL <1000)
NSC_61	>2	<400	3.67	3.39	3.57	94.76	n/a (VL <1000)
NSC_62	>2	<400	2.92	3.34	3.36	99.45	n/a (VL <1000)
NSC_63	>2	<400	0.6	3.34	3.35	99.56	n/a (VL <1000)
NSC_64	>2	<400	5.48	3.41	3.41	100.07	n/a (VL <1000)
NSC_65	>2	<400	3.17	3.43	3.41	100.5	n/a (VL <1000)
NSC_66	>2	<400	0.95	3.03	3.15	96.18	n/a (VL <1000)
NSC_67	>2	<400	2.28	3.2	3.35	95.73	n/a (VL <1000)
NSC_68	>2	<400	2.95	3.46	3.41	101.36	n/a (VL <1000)
NSC_69	>2	<400	5.08	3.47	3.4	102.02	n/a (VL <1000)
NSC_70	>2	<400	3.64	3.34	3.37	99.02	n/a (VL <1000)
NSC_71	>2	<400	5.34	3.41	3.65	93.48	n/a (VL <1000)
NSC_72	>2	<400	3.55	3.45	3.39	101.76	n/a (VL <1000)
NSC_73	>2	<400	4.44	2.49	3.41	72.94	n/a (VL <1000)
NSC_74	>2	<400	3.4	3.27	3.38	96.72	n/a (VL <1000)
NSC_75	>2	<400	2.86	3.16	3.23	97.93	n/a (VL <1000)
NSC_76	>2	<400	2.83	3.33	3.62	91.76	n/a (VL <1000)
NSC_77	>2	<400	4.85	3.45	3.38	102.18	n/a (VL <1000)
NSC_78	>2	<400	5.78	3.39	3.43	98.87	n/a (VL <1000)
NSC_79	>2	<400	2.12	3.38	3.59	94.11	n/a (VL <1000)
NSC_80	>2	<400	6.03	3.41	3.58	95.14	n/a (VL <1000)
NSC_81	>2	<400	1.53	3.01	3.31	91.01	n/a (VL <1000)
NSC_82	>2	<400	5.12	3.45	3.34	103.21	n/a (VL <1000)
NSC_83	>2	<400	1.07	2.42	3.3	73.14	n/a (VL <1000)
NSC_84	>2	<400	2.35	3.17	3.38	94.05	n/a (VL <1000)
NSC_85	>2	<400	1.38	2.93	3.34	87.72	n/a (VL <1000)
NSC_86	>2	<400	5.77	3.32	3.35	99.28	n/a (VL <1000)
NSC_87	>2	<400	2.7	3.36	3.6	93.18	n/a (VL <1000)
NSC_88	>2	<400	5.1	3.34	3.37	99.13	n/a (VL <1000)
NSC_89	>2	<400	1.55	2.67	3.33	80.11	n/a (VL <1000)
NSC_90	>2	<400	4.41	3.37	3.42	98.59	n/a (VL <1000)
NSC_91	>2	<400	2.03	3.4	3.41	99.82	n/a (VL <1000)
NSC_92	>2	<400	5.36	3.39	3.56	95.29	n/a (VL <1000)
NSC_93	>2	<400	2.39	2.6	3.42	76.08	n/a (VL <1000)
NSC_94	>2	<400	5.16	3.47	3.39	102.37	n/a (VL <1000)
NSC_95	>2	<400	3.48	3.35	3.38	99.23	n/a (VL <1000)
NSC_96	>2	<400	4.81	3.34	3.35	99.81	n/a (VL <1000)
NSC_97	>2	<400	4.76	3.39	3.42	99.28	n/a (VL <1000)
NSC_98	>2	<400	5.18	3.38	3.66	92.24	n/a (VL <1000)
NSC_99	>2	<400	0.11	2.95	2.83	104.36	n/a (VL <1000)
NSC_100	>2	<400	3.35	3.39	3.66	92.67	n/a (VL <1000)
NSC_101	>2	<400	4.25	3.42	3.63	93.98	n/a (VL <1000)
NSC_102	>2	<400	5.21	3.34	3.35	99.6	n/a (VL <1000)
NSC_103	>2	<400	5.29	3.39	3.64	93.27	n/a (VL <1000)
NSC_104	>2	<400	1.52	3.39	3.31	102.32	n/a (VL <1000)
NSC_105	>2	<400	5.13	3.43	3.39	101.32	n/a (VL <1000)
NSC_106	>2	<400	4.25	3.44	3.37	102.28	n/a (VL <1000)
NSC_107	>2	<400	5.39	3.4	3.44	99.03	n/a (VL <1000)
NSC_108	>2	<400	4.65	3.44	3.37	102.22	n/a (VL <1000)
NSC_109	>2	<400	4.79	3.42	3.43	99.75	n/a (VL <1000)
NSC_110	>2	<400	1.34	1.45	3.35	43.27	n/a (VL <1000)
NSC_111	>2	<400	5.41	2.95	3.36	87.75	n/a (VL <1000)
NSC_112	>2	<400	3.67	3.44	3.44	99.85	n/a (VL <1000)
NSC_113	>2	<400	5.71	3.5	3.39	103.07	n/a (VL <1000)
NSC_114	>2	<400	3.98	3.38	3.4	99.32	n/a (VL <1000)
NSC_115	>2	<400	5.84	3.36	3.37	99.71	n/a (VL <1000)
NSC_116	>2	<400	5.69	3.38	3.41	99.12	n/a (VL <1000)
NSC_117	>2	<400	1.88	3.38	3.35	100.91	n/a (VL <1000)
NSC_118	>2	<400	5.8	3.51	3.35	104.56	n/a (VL <1000)
NSC_119	>2	<400	2.61	3.41	3.64	93.67	n/a (VL <1000)
NSC_120	>2	<400	1.84	3.17	3.33	94.92	n/a (VL <1000)
NSC_121	>2	<400	3.79	3.43	3.45	99.38	n/a (VL <1000)
NSC_122	>2	<400	3.56	3.4	3.63	93.68	n/a (VL <1000)
NSC_123	>2	<400	4.3	3.5	3.41	102.73	n/a (VL <1000)
NSC_124	>2	<400	5.52	3.44	3.38	101.68	n/a (VL <1000)
NSC_125	>2	<400	5.24	3.42	3.62	94.6	n/a (VL <1000)
NSC_126	>2	<400	0.83	3.06	3.29	92.9	n/a (VL <1000)
NSC_127	>2	<400	1.05	3.5	3.32	105.6	n/a (VL <1000)
NSC_128	>2	<400	3.51	3.38	3.39	99.83	n/a (VL <1000)
NSC_129	>2	<400	2.8	3.17	3.41	92.94	n/a (VL <1000)
NSC_130	>2	<400	1.78	3.16	3.62	87.31	n/a (VL <1000)
NSC_131	>2	<400	1.82	3.49	3.41	102.39	n/a (VL <1000)
NSC_132	>2	<400	5.88	3.42	3.64	94.12	n/a (VL <1000)
NSC_133	>2	<400	4.52	3.43	3.62	94.8	n/a (VL <1000)
NSC_134	>2	<400	5.7	3.49	3.4	102.44	n/a (VL <1000)
NSC_135	>2	<400	5.9	3.44	3.64	94.57	n/a (VL <1000)
NSC_136	>2	<400	3.75	3.45	3.6	95.82	n/a (VL <1000)
NSC_137	>2	<400	0.85	2.52	3.06	82.42	n/a (VL <1000)
NSC_138	>2	<400	4.21	3.37	3.38	99.58	n/a (VL <1000)
NSC_139	>2	<400	4.51	3.44	3.36	102.49	n/a (VL <1000)
NSC_140	>2	<400	3.39	3.46	3.34	103.39	n/a (VL <1000)
NSC_141	>2	<400	4.59	3.43	3.42	100.52	n/a (VL <1000)
NSC_142	>2	<400	1.93	3.41	3.41	100	n/a (VL <1000)
NSC_143	>2	<400	2.92	3.25	3.43	94.7	n/a (VL <1000)
NSC_144	>2	<400	5.54	3.37	3.61	93.41	n/a (VL <1000)
NSC_145	>2	<400	1.73	3.36	3.37	99.69	n/a (VL <1000)
NSC_146	>2	<400	5.33	3.3	3.65	90.4	n/a (VL <1000)
NSC_147	>2	<400	3.35	3.38	3.57	94.74	n/a (VL <1000)
NSC_148	>2	<400	0.49	2.62	2.94	89.28	n/a (VL <1000)
NSC_149	>2	<400	4.98	3.4	3.38	100.68	n/a (VL <1000)
NSC_150	>2	<400	4.56	3.37	3.37	100.2	n/a (VL <1000)
NSC_151	>2	<400	2.19	3.43	3.37	101.78	n/a (VL <1000)
NSC_152	>2	<400	3.18	3.37	3.38	99.74	n/a (VL <1000)
NSC_153	>2	<400	3.81	3.47	3.39	102.31	n/a (VL <1000)
NSC_154	>2	<400	5.54	3.35	3.36	99.72	n/a (VL <1000)
NSC_155	>2	<400	3.48	3.4	3.46	98.24	n/a (VL <1000)
NSC_156	>2	<400	3.23	3.46	3.34	103.39	n/a (VL <1000)
NSC_157	>2	<400	3.2	3.35	3.54	94.63	n/a (VL <1000)
NSC_158	>2	<400	5.02	3.51	3.36	104.7	n/a (VL <1000)
NSC_159	>2	<400	5.53	3.42	3.44	99.56	n/a (VL <1000)
NSC_160	>2	<400	5.35	3.43	3.4	100.65	n/a (VL <1000)
NSC_161	>2	<400	1.65	3.15	3.32	94.83	n/a (VL <1000)
NSC_162	>2	<400	3.48	3.43	3.61	95.04	n/a (VL <1000)
NSC_163	>2	<400	3.25	3.46	3.42	101.04	n/a (VL <1000)
NSC_164	>2	<400	4.4	3.44	3.34	102.87	n/a (VL <1000)
NSC_165	>2	<400	3.06	3.37	3.33	101.04	n/a (VL <1000)
NSC_166	>2	<400	5.5	3.43	3.39	101.29	n/a (VL <1000)
NSC_167	>2	<400	0.87	3.42	3.35	102.23	n/a (VL <1000)
NSC_168	>2	<400	2.21	2.22	3.4	65.27	n/a (VL <1000)
NSC_169	>2	<400	2.07	3.21	3.55	90.46	n/a (VL <1000)
NSC_170	>2	<400	5.69	3.41	3.38	100.91	n/a (VL <1000)
NSC_171	>2	<400	5.7	3.42	3.67	93.24	n/a (VL <1000)
NSC_172	>2	<400	2.79	2.51	3.38	74.18	n/a (VL <1000)
NSC_173	>2	<400	5.33	3.36	3.37	99.88	n/a (VL <1000)
NSC_174	>2	<400	3.4	3.43	3.43	100.07	n/a (VL <1000)
NSC_175	>2	<400	5.46	3.4	3.4	99.94	n/a (VL <1000)
NSC_176	>2	<400	4.26	3.26	3.37	96.77	n/a (VL <1000)
NSC_177	>2	<400	5.06	3.39	3.38	100.11	n/a (VL <1000)
NSC_178	>2	<400	5.52	3.42	3.64	93.89	n/a (VL <1000)
NSC_179	>2	<400	1.73	3.43	3.48	98.57	n/a (VL <1000)
NSC_180	>2	<400	4.68	3.5	3.41	102.5	n/a (VL <1000)
NSC_181	>2	<400	4.04	3.36	3.37	99.78	n/a (VL <1000)
NSC_182	>2	<400	0.55	2.59	3.05	84.95	n/a (VL <1000)
NSC_183	>2	<400	2.48	3.49	3.42	102	n/a (VL <1000)
NSC_184	>2	<400	4.88	3.45	3.62	95.37	n/a (VL <1000)
NSC_185	>2	<400	2.87	3.45	3.4	101.51	n/a (VL <1000)
NSC_186	>2	<400	3.56	3.38	3.44	98.19	n/a (VL <1000)
NSC_187	>2	<400	4.29	3.4	3.62	93.8	n/a (VL <1000)
NSC_188	>2	<400	0.75	3.36	3.41	98.43	n/a (VL <1000)
NSC_189	>2	<400	3.66	3.46	3.36	103.08	n/a (VL <1000)
NSC_190	>2	<400	4.8	3.38	3.44	98.34	n/a (VL <1000)
NSC_191	>2	<400	5.61	3.43	3.65	93.81	n/a (VL <1000)
NSC_192	>2	<400	5.62	3.45	3.4	101.36	n/a (VL <1000)
NSC_193	>2	<400	5.22	3.46	3.43	100.92	n/a (VL <1000)
NSC_194	>2	<400	4.5	3.34	3.35	99.84	n/a (VL <1000)
NSC_195	>2	<400	4.55	3.45	3.4	101.5	n/a (VL <1000)
NSC_196	>2	<400	2.21	3.43	3.37	101.74	n/a (VL <1000)
NSC_197	>2	<400	1.45	3.38	3.37	100.34	n/a (VL <1000)
NSC_198	>2	<400	2.68	3.11	3.6	86.23	n/a (VL <1000)
NSC_199	>2	<400	5.57	3.47	3.64	95.3	n/a (VL <1000)
NSC_200	>2	<400	0.6	2.39	3.61	66.2	n/a (VL <1000)
NSC_201	>2	<400	6.09	3.4	3.38	100.66	n/a (VL <1000)
NSC_202	>2	<400	3.68	3.51	3.34	105.03	n/a (VL <1000)
NSC_203	>2	<400	4.21	3.37	3.38	99.77	n/a (VL <1000)
NSC_204	>2	<400	3.59	3.39	3.44	98.62	n/a (VL <1000)
NSC_205	>2	<400	5.43	3.5	3.47	100.84	n/a (VL <1000)
NSC_206	>2	<400	3.24	3.37	3.38	99.65	n/a (VL <1000)
NSC_207	>2	<400	0.23	2.32	3.22	71.9	n/a (VL <1000)
NSC_208	>2	<400	5.37	3.46	3.47	99.98	n/a (VL <1000)
NSC_209	>2	<400	5.37	3.4	3.38	100.57	n/a (VL <1000)
NSC_210	>2	<400	4.82	3.33	3.38	98.49	n/a (VL <1000)
NSC_211	>2	<400	5.45	3.38	3.65	92.65	n/a (VL <1000)
NSC_212	>2	<400	3.2	3.47	3.38	102.7	n/a (VL <1000)
NSC_213	>2	<400	0.45	3.07	3.44	89.11	n/a (VL <1000)
NSC_214	>2	<400	2.25	3.35	3.38	99.16	n/a (VL <1000)
NSC_215	>2	<400	3.53	3.45	3.44	100.32	n/a (VL <1000)
NSC_216	>2	<400	4.94	3.46	3.6	95.99	n/a (VL <1000)
NSC_217	>2	<400	4.45	3.47	3.42	101.62	n/a (VL <1000)
NSC_218	>2	<400	4.79	3.44	3.38	101.69	n/a (VL <1000)
NSC_219	>2	<400	3.69	3.36	3.37	99.54	n/a (VL <1000)
NSC_220	>2	<400	3.55	3.4	3.61	94.23	n/a (VL <1000)
NSC_221	>2	<400	4.31	3.39	3.65	92.92	n/a (VL <1000)
NSC_222	>2	<400	6.54	3.52	3.39	103.66	n/a (VL <1000)
NSC_223	>2	<400	2.14	3.33	3.35	99.44	n/a (VL <1000)
NSC_224	>2	<400	4.6	3.45	3.64	94.88	n/a (VL <1000)
NSC_225	>2	<400	4.67	3.34	3.4	98.29	n/a (VL <1000)
NSC_226	>2	<400	3.36	3.29	3.36	98.02	n/a (VL <1000)
NSC_227	>2	<400	3.59	3.5	3.38	103.61	n/a (VL <1000)
NSC_228	>2	<400	3.3	3.45	3.46	99.98	n/a (VL <1000)
NSC_229	>2	<400	4.46	3.49	3.39	103.2	n/a (VL <1000)
NSC_230	>2	<400	2.67	3.35	3.33	100.32	n/a (VL <1000)
NSC_231	>2	<400	5.01	3.4	3.69	92.12	n/a (VL <1000)
NSC_232	>2	<400	0.22	1.61	2.52	64	n/a (VL <1000)
NSC_233	>2	<400	3.11	3.47	3.46	100.41	n/a (VL <1000)
NSC_234	>2	<400	3.72	3.14	3.7	84.87	n/a (VL <1000)
NSC_235	>2	<400	0.52	3.24	3.51	92.43	n/a (VL <1000)
NSC_236	>2	<400	3.41	3.39	3.39	100.05	n/a (VL <1000)
NSC_237	>2	<400	4.82	3.46	3.41	101.25	n/a (VL <1000)
NSC_238	>2	<400	0.89	3.1	3.42	90.56	n/a (VL <1000)
NSC_239	>2	<400	3.43	3.29	3.29	100.22	n/a (VL <1000)
NSC_240	>2	<400	0.54	3.3	3.33	99.16	n/a (VL <1000)
NSC_241	>2	<400	4.49	3.33	3.36	99.23	n/a (VL <1000)
NSC_242	>2	<400	2.1	3.31	3.5	94.74	n/a (VL <1000)
NSC_243	>2	<400	4.21	3.47	3.47	99.88	n/a (VL <1000)
NSC_244	>2	<400	3.97	3.45	3.44	100.13	n/a (VL <1000)
NSC_245	>2	<400	1.81	3.22	3.33	96.64	n/a (VL <1000)
NSC_246	>2	<400	0.33	2.77	3.3	83.89	n/a (VL <1000)
NSC_247	>2	<400	3.33	3.44	3.39	101.5	n/a (VL <1000)
NSC_248	>2	<400	4.38	3.37	3.42	98.62	n/a (VL <1000)
NSC_249	>2	<400	4.79	3.43	3.6	95.28	n/a (VL <1000)
NSC_250	>2	<400	3.22	3.43	3.36	102.07	n/a (VL <1000)
NSC_251	>2	<400	4.6	3.38	3.44	98.24	n/a (VL <1000)
NSC_252	>2	<400	1.48	3.44	3.58	96.01	n/a (VL <1000)
NSC_253	>2	<400	3.27	3.1	3.32	93.44	n/a (VL <1000)
NSC_254	>2	<400	5.06	3.43	3.39	101.23	n/a (VL <1000)
NSC_255	>2	<400	5.73	3.37	3.38	99.53	n/a (VL <1000)
NSC_256	>2	<400	2.37	3.26	3.6	90.4	n/a (VL <1000)
NSC_257	>2	<400	3.78	3.42	3.39	100.95	n/a (VL <1000)
NSC_258	>2	<400	1.32	3.17	3.32	95.43	n/a (VL <1000)
NSC_259	>2	<400	3.94	3.49	3.4	102.52	n/a (VL <1000)
NSC_260	>2	<400	1.3	3.43	3.37	101.76	n/a (VL <1000)
NSC_261	>2	<400	4.9	3.39	3.41	99.62	n/a (VL <1000)
NSC_262	>2	<400	2.46	3.46	3.39	102.14	n/a (VL <1000)
NSC_263	>2	<400	2.96	3.37	3.59	93.7	n/a (VL <1000)
NSC_264	>2	<400	5.9	3.46	3.44	100.59	n/a (VL <1000)
NSC_265	>2	<400	3.94	3.39	3.38	100.29	n/a (VL <1000)
NSC_266	>2	<400	4.23	3.44	3.64	94.57	n/a (VL <1000)
NSC_267	>2	<400	4.29	3.42	3.62	94.27	n/a (VL <1000)
NSC_268	>2	<400	4.07	3.44	3.37	102.31	n/a (VL <1000)
NSC_269	>2	<400	4.93	3.47	3.46	100.25	n/a (VL <1000)
NSC_270	>2	<400	3.16	3.44	3.44	100.22	n/a (VL <1000)
NSC_271	>2	<400	3.91	3.46	3.33	103.78	n/a (VL <1000)
NSC_272	>2	<400	4.98	3.39	3.4	99.71	n/a (VL <1000)
NSC_273	>2	<400	3.85	3.37	3.65	92.51	n/a (VL <1000)
NSC_274	>2	<400	1.07	3.37	3.39	99.33	n/a (VL <1000)
NSC_275	>2	<400	2.33	3.44	3.38	101.63	n/a (VL <1000)
NSC_276	>2	<400	3.01	3.38	3.4	99.4	n/a (VL <1000)
NSC_277	>2	<400	5.78	3.43	3.38	101.59	n/a (VL <1000)
NSC_278	>2	<400	3.53	3.37	3.61	93.14	n/a (VL <1000)
NSC_279	>2	<400	0.14	1.07	1.56	68.23	n/a (VL <1000)
NSC_280	>2	<400	1.93	3.3	3.36	98.14	n/a (VL <1000)
NSC_281	>2	<400	2.07	3.49	3.36	103.71	n/a (VL <1000)
NSC_282	>2	<400	2.82	2.58	3.23	79.88	n/a (VL <1000)
NSC_283	>2	<400	2.37	3.15	3.38	93.15	n/a (VL <1000)
NSC_284	>2	<400	3.88	3.47	3.42	101.31	n/a (VL <1000)
NSC_285	>2	<400	3.44	3.41	3.63	93.85	n/a (VL <1000)
NSC_286	>2	<400	3.33	3.2	3.62	88.24	n/a (VL <1000)
NSC_287	>2	<400	4.94	3.41	3.58	95.14	n/a (VL <1000)
NSC_288	>2	<400	4.08	3.5	3.39	103.28	n/a (VL <1000)
NSC_289	>2	<400	3.82	1.55	3.57	43.47	n/a (VL <1000)
NSC_290	>2	<400	4.56	3.37	3.39	99.55	n/a (VL <1000)
NSC_291	>2	<400	5.07	3.43	3.69	92.94	n/a (VL <1000)
NSC_292	>2	<400	4.08	3.31	3.62	91.44	n/a (VL <1000)
NSC_293	>2	<400	5.09	3.43	3.36	101.92	n/a (VL <1000)
NSC_294	>2	<400	0.93	3.42	3.64	93.82	n/a (VL <1000)
NSC_295	>2	<400	4.02	2.73	3.55	76.89	n/a (VL <1000)
NSC_296	>2	<400	0.83	1.68	3.15	53.2	n/a (VL <1000)
NSC_297	>2	<400	5.63	3.45	3.41	101.23	n/a (VL <1000)
NSC_298	>2	<400	2.47	3.34	3.4	98.25	n/a (VL <1000)
NSC_299	>2	<400	2.57	3.39	3.41	99.42	n/a (VL <1000)
NSC_300	>2	<400	5.46	3.37	3.4	99.14	n/a (VL <1000)
NSC_301	>2	<400	5.56	3.34	3.35	99.59	n/a (VL <1000)
NSC_302	>2	<400	1.71	3	3.24	92.49	n/a (VL <1000)
NSC_303	>2	<400	0.69	3.34	3.36	99.32	n/a (VL <1000)
NSC_304	>2	<400	6.15	3.4	3.41	99.78	n/a (VL <1000)
NSC_305	>2	<400	4.93	3.38	3.43	98.79	n/a (VL <1000)
NSC_306	>2	<400	3.28	3.47	3.44	100.94	n/a (VL <1000)
NSC_307	>2	<400	5.12	3.42	3.66	93.37	n/a (VL <1000)
NSC_308	>2	<400	5.63	3.45	3.45	99.91	n/a (VL <1000)
NSC_309	>2	<400	3.6	3.37	3.65	92.14	n/a (VL <1000)
NSC_310	>2	<400	4.66	3.17	3.36	94.48	n/a (VL <1000)
NSC_311	>2	<400	2.01	3.44	3.39	101.25	n/a (VL <1000)
NSC_312	>2	<400	5.31	3.37	3.57	94.33	n/a (VL <1000)
NSC_313	>2	<400	4.52	3.46	3.41	101.44	n/a (VL <1000)
NSC_314	>2	<400	1.71	3.35	3.61	92.63	n/a (VL <1000)
NSC_315	>2	<400	4.8	3.43	3.39	101.23	n/a (VL <1000)
NSC_316	>2	<400	3.48	3.35	3.4	98.63	n/a (VL <1000)
NSC_317	>2	<400	0.5	2.4	2.91	82.62	n/a (VL <1000)
NSC_318	>2	<400	5.06	3.46	3.38	102.42	n/a (VL <1000)
NSC_319	>2	<400	4.37	3.41	3.56	95.85	n/a (VL <1000)
NSC_320	>2	<400	3.52	3.33	3.4	97.96	n/a (VL <1000)
NSC_321	>2	<400	3.05	3.3	3.37	98.03	n/a (VL <1000)
NSC_322	>2	<400	3.57	3.34	3.62	92.09	n/a (VL <1000)
NSC_323	>2	<400	4.69	3.39	3.37	100.7	n/a (VL <1000)
NSC_324	>2	<400	4.15	3.4	3.41	99.88	n/a (VL <1000)
NSC_325	>2	<400	5.96	3.43	3.63	94.71	n/a (VL <1000)
NSC_326	>2	<400	2.23	3.52	3.4	103.65	n/a (VL <1000)
NSC_327	>2	<400	4.74	3.44	3.68	93.33	n/a (VL <1000)
NSC_328	>2	<400	5.28	3.41	3.38	100.74	n/a (VL <1000)
NSC_329	>2	<400	1.54	2.88	3.28	87.71	n/a (VL <1000)
NSC_330	>2	<400	2.24	3	3.35	89.55	n/a (VL <1000)
NSC_331	>2	<400	4.51	3.35	3.38	99.12	n/a (VL <1000)
NSC_332	>2	<400	3.49	3.4	3.39	100.18	n/a (VL <1000)
NSC_333	>2	<400	1.3	3.48	3.35	103.81	n/a (VL <1000)
NSC_334	>2	<400	2.59	2.44	3.3	73.88	n/a (VL <1000)
NSC_335	>2	<400	4.25	2.98	3.56	83.68	n/a (VL <1000)
NSC_336	>2	<400	3.66	3.36	3.38	99.48	n/a (VL <1000)
NSC_337	>2	<400	3.07	3.44	3.39	101.38	n/a (VL <1000)
NSC_338	>2	<400	2.89	3.23	3.38	95.58	n/a (VL <1000)
NSC_339	>2	<400	0.31	0.4	1.75	22.86	n/a (VL <1000)
NSC_340	>2	<400	4.44	3.46	3.44	100.58	n/a (VL <1000)
NSC_341	>2	<400	0.73	3.05	3.38	90.23	n/a (VL <1000)
NSC_342	>2	<400	2.29	3.42	3.33	102.73	n/a (VL <1000)
NSC_343	>2	<400	3.69	3.37	3.37	99.86	n/a (VL <1000)
NSC_344	>2	<400	1.53	3.37	3.51	96.22	n/a (VL <1000)
NSC_345	>2	<400	2.23	2.58	3.25	79.35	n/a (VL <1000)
NSC_346	>2	<400	5.16	3.39	3.65	93	n/a (VL <1000)
NSC_347	>2	<400	0.74	3.37	3.37	99.97	n/a (VL <1000)
NSC_348	>2	<400	1.42	3.35	3.36	99.62	n/a (VL <1000)
NSC_349	>2	<400	3.64	3.46	3.37	102.83	n/a (VL <1000)
NSC_350	>2	<400	3.88	3.43	3.39	101.15	n/a (VL <1000)
NSC_351	>2	<400	3.92	3.4	3.39	100.08	n/a (VL <1000)
NSC_352	>2	<400	2.77	3.44	3.44	100.08	n/a (VL <1000)
NSC_353	>2	<400	5.77	3.42	3.65	93.75	n/a (VL <1000)
NSC_354	>2	<400	4.25	3.31	3.59	92.21	n/a (VL <1000)
NSC_355	>2	<400	1.81	3.38	3.39	99.88	n/a (VL <1000)
NSC_356	>2	<400	5.11	3.39	3.38	100.35	n/a (VL <1000)
NSC_357	>2	<400	3.72	3.34	3.42	97.49	n/a (VL <1000)
NSC_358	>2	<400	1.28	3.43	3.65	93.75	n/a (VL <1000)
NSC_359	>2	<400	4.6	3.45	3.41	101.31	n/a (VL <1000)
NSC_360	>2	<400	4.84	3.43	3.64	94.34	n/a (VL <1000)
NSC_361	>2	<400	2.72	3.34	3.32	100.71	n/a (VL <1000)
NSC_362	>2	<400	1.23	3.35	3.37	99.24	n/a (VL <1000)
NSC_363	>2	<400	2.53	3.44	3.57	96.27	n/a (VL <1000)
NSC_364	>2	<400	3.75	3.4	3.57	95.27	n/a (VL <1000)
NSC_365	>2	<400	3.37	3.45	3.44	100.16	n/a (VL <1000)
NSC_366	>2	<400	1.56	3.11	3.58	86.9	n/a (VL <1000)
NSC_367	>2	<400	2.6	3.42	3.36	101.58	n/a (VL <1000)
NSC_368	>2	<400	3.22	3.4	3.41	99.79	n/a (VL <1000)
NSC_369	>2	<400	3.27	3.4	3.59	94.87	n/a (VL <1000)
NSC_370	>2	<400	6.6	3.47	3.4	102.13	n/a (VL <1000)
NSC_371	>2	<400	4	3.44	3.4	101.14	n/a (VL <1000)
NSC_372	>2	<400	3.14	3.42	3.42	99.83	n/a (VL <1000)
NSC_373	>2	<400	5.03	3.4	3.61	94.19	n/a (VL <1000)
NSC_374	>2	<400	2.4	3.32	3.39	97.85	n/a (VL <1000)
NSC_375	>2	<400	3.82	3.47	3.36	103.36	n/a (VL <1000)
NSC_376	>2	<400	4.11	3.35	3.4	98.53	n/a (VL <1000)
NSC_377	>2	<400	2.99	3.38	3.6	93.88	n/a (VL <1000)
NSC_378	>2	<400	4.51	3.43	3.62	94.7	n/a (VL <1000)
NSC_379	>2	<400	4.86	3.45	3.41	101.05	n/a (VL <1000)
NSC_380	>2	<400	3.71	3.49	3.39	102.93	n/a (VL <1000)
NSC_381	>2	<400	3.05	3.11	3.37	92.08	n/a (VL <1000)
NSC_382	>2	<400	2.92	3.11	3.34	93.11	n/a (VL <1000)
NSC_383	>2	<400	4.21	3.4	3.62	93.91	n/a (VL <1000)
NSC_384	>2	<400	4.16	3.43	3.36	102.08	n/a (VL <1000)
NSC_385	>2	<400	5.05	3.37	3.41	98.98	n/a (VL <1000)
NSC_386	>2	<400	2.19	3.41	3.4	100.31	n/a (VL <1000)
NSC_387	>2	<400	1.39	2.29	3.35	68.22	n/a (VL <1000)
NSC_388	>2	<400	2.55	3.33	3.41	97.76	n/a (VL <1000)
NSC_389	>2	<400	1.37	3.35	3.36	99.55	n/a (VL <1000)
NSC_390	>2	<400	2.92	3.43	3.63	94.45	n/a (VL <1000)
NSC_391	>2	<400	4.54	3.46	3.44	100.35	n/a (VL <1000)
NSC_392	>2	<400	0.27	2.45	3.05	80.25	n/a (VL <1000)
NSC_393	>2	<400	3.33	3.39	3.32	102.09	n/a (VL <1000)
NSC_394	>2	<400	1.17	2.18	2.7	80.71	n/a (VL <1000)
NSC_395	>2	<400	1.11	1.48	3.33	44.34	n/a (VL <1000)
NSC_396	>2	<400	5.13	3.35	3.37	99.44	n/a (VL <1000)
NSC_397	>2	<400	2.7	3.39	3.31	102.54	n/a (VL <1000)
NSC_398	>2	<400	2.38	3.43	3.61	95.19	n/a (VL <1000)
NSC_399	>2	<400	1.82	3.44	3.32	103.58	n/a (VL <1000)
NSC_400	>2	<400	4.36	3.46	3.37	102.65	n/a (VL <1000)
NSC_401	>2	<400	0.63	2.46	3.29	74.64	n/a (VL <1000)
NSC_402	>2	<400	4.44	3.44	3.63	94.88	n/a (VL <1000)
NSC_403	>2	<400	3.5	3.32	3.54	93.97	n/a (VL <1000)
NSC_404	>2	<400	3.14	3.41	3.59	94.84	n/a (VL <1000)
NSC_405	>2	<400	3.45	3.4	3.4	99.9	n/a (VL <1000)
NSC_406	>2	<400	3.5	3.45	3.46	99.8	n/a (VL <1000)
NSC_407	>2	<400	5.05	3.12	3.62	86.21	n/a (VL <1000)
NSC_408	>2	<400	5.06	3.36	3.43	97.86	n/a (VL <1000)
NSC_409	>2	<400	1.17	2.67	3.43	77.83	n/a (VL <1000)
NSC_410	>2	<400	5.4	3.13	3.32	94.21	n/a (VL <1000)
NSC_411	>2	<400	1.44	3.01	3.13	96.14	n/a (VL <1000)
NSC_412	>2	<400	5.83	3.42	3.57	95.78	n/a (VL <1000)
NSC_413	>2	<400	3.77	3.35	3.61	92.58	n/a (VL <1000)
NSC_414	>2	<400	3.63	3.35	3.35	99.84	n/a (VL <1000)
NSC_415	>2	<400	3.91	3.04	3.53	85.95	n/a (VL <1000)
NSC_416	>2	<400	4.7	3.4	3.64	93.3	n/a (VL <1000)
NSC_417	>2	<400	3.3	3.39	3.4	99.72	n/a (VL <1000)
NSC_418	>2	<400	2.54	2.75	3.11	88.35	n/a (VL <1000)
NSC_419	>2	<400	5.42	3.38	3.39	99.55	n/a (VL <1000)
NSC_420	>2	<400	4.33	3.4	3.45	98.45	n/a (VL <1000)
NSC_421	>2	<400	0.11	0.31	1.39	22.36	n/a (VL <1000)
NSC_422	>2	<400	2.62	3.33	3.37	99	n/a (VL <1000)
NSC_423	>2	<400	2.3	2.4	3.64	65.99	n/a (VL <1000)
NSC_424	>2	<400	4.72	3.4	3.63	93.61	n/a (VL <1000)
NSC_425	>2	<400	5.81	3.48	3.42	101.97	n/a (VL <1000)
NSC_426	>2	<400	1.39	2.95	3.43	85.97	n/a (VL <1000)
NSC_427	>2	<400	2.44	3.32	3.36	99.05	n/a (VL <1000)
NSC_428	>2	<400	4.02	3.36	3.37	99.69	n/a (VL <1000)
NSC_429	>2	<400	5.88	3.41	3.63	94.02	n/a (VL <1000)
NSC_430	>2	<400	4.97	3.44	3.38	101.64	n/a (VL <1000)
NSC_431	>2	<400	0.9	3.48	3.46	100.63	n/a (VL <1000)
NSC_432	>2	<400	2.53	2.99	3.21	93.27	n/a (VL <1000)
NSC_433	>2	<400	3.08	3.41	3.39	100.68	n/a (VL <1000)
NSC_434	>2	<400	3.5	3.36	3.4	98.95	n/a (VL <1000)
NSC_435	>2	<400	2.91	3.39	3.39	100.01	n/a (VL <1000)
NSC_436	>2	<400	0.13	3.03	3.33	91.06	n/a (VL <1000)
NSC_437	>2	<400	1.56	3.36	3.57	94.26	n/a (VL <1000)
NSC_438	>2	<400	6.65	3.42	3.63	94.21	n/a (VL <1000)
NSC_439	>2	<400	0.26	2.52	2.84	88.6	n/a (VL <1000)
NSC_440	>2	<400	3.84	3.26	3.65	89.29	n/a (VL <1000)
NSC_441	>2	<400	4.08	3.54	3.37	104.98	n/a (VL <1000)
NSC_442	>2	<400	4.78	3.45	3.37	102.47	n/a (VL <1000)
NSC_443	>2	<400	4.56	3.48	3.39	102.72	n/a (VL <1000)
NSC_444	>2	<400	4.79	3.3	3.6	91.63	n/a (VL <1000)
NSC_445	>2	<400	5.59	3.44	3.36	102.55	n/a (VL <1000)
NSC_446	>2	<400	5.42	3.43	3.41	100.46	n/a (VL <1000)
NSC_447	>2	<400	3.32	3.48	3.46	100.58	n/a (VL <1000)
NSC_448	>2	<400	5.03	3.5	3.38	103.79	n/a (VL <1000)
NSC_449	>2	<400	4.91	3.15	3.39	92.84	n/a (VL <1000)
NSC_450	>2	<400	3.44	1.05	2.85	36.87	n/a (VL <1000)
NSC_451	>2	<400	3.84	3.45	3.59	96.04	n/a (VL <1000)
NSC_452	>2	<400	5.05	3.38	3.42	98.6	n/a (VL <1000)
NSC_453	>2	<400	2.18	3.37	3.35	100.44	n/a (VL <1000)
NSC_454	>2	<400	3.42	3.4	3.64	93.43	n/a (VL <1000)
NSC_455	>2	<400	3.77	3.28	3.39	96.81	n/a (VL <1000)
NSC_456	>2	<400	3.16	3.33	3.39	98.33	n/a (VL <1000)
NSC_457	>2	<400	1.38	2.96	3.34	88.78	n/a (VL <1000)
NSC_458	>2	<400	1.95	2.79	3.46	80.77	n/a (VL <1000)
NSC_459	>2	<400	3.63	3.08	3.32	92.78	n/a (VL <1000)
NSC_460	>2	<400	5.83	3.33	3.35	99.44	n/a (VL <1000)
NSC_461	>2	<400	3.41	3.39	3.63	93.56	n/a (VL <1000)
NSC_462	>2	<400	5.97	3.41	3.39	100.47	n/a (VL <1000)
NSC_463	>2	<400	4.07	3.48	3.41	102.19	n/a (VL <1000)
NSC_464	>2	<400	3.89	3.4	3.35	101.45	n/a (VL <1000)
NSC_465	>2	<400	1.17	2.63	3.23	81.42	n/a (VL <1000)
NSC_466	>2	<400	1.77	3.36	3.6	93.45	n/a (VL <1000)
NSC_467	>2	<400	5.86	3.36	3.37	99.67	n/a (VL <1000)
NSC_468	>2	<400	1.86	2.39	3.32	72.11	n/a (VL <1000)
NSC_469	>2	<400	2.17	3.44	3.44	99.97	n/a (VL <1000)
NSC_470	>2	<400	2.1	3.38	3.6	93.91	n/a (VL <1000)
NSC_471	>2	<400	4.77	3.25	3.4	95.73	n/a (VL <1000)
NSC_472	>2	<400	5.7	3.41	3.58	95.23	n/a (VL <1000)
NSC_473	>2	<400	5.33	3.46	3.61	95.97	n/a (VL <1000)
NSC_474	>2	<400	5.06	3.43	3.61	95.03	n/a (VL <1000)
NSC_475	>2	<400	0.89	3.38	3.38	99.82	n/a (VL <1000)
NSC_476	>2	<400	0.66	3.01	3.32	90.71	n/a (VL <1000)
NSC_477	>2	<400	4	3.44	3.35	102.73	n/a (VL <1000)
NSC_478	>2	<400	5.8	3.46	3.45	100.36	n/a (VL <1000)
NSC_479	>2	<400	2.28	3.14	3.29	95.35	n/a (VL <1000)
NSC_480	>2	<400	5.51	3.46	3.37	102.66	n/a (VL <1000)
NSC_481	>2	<400	4	3.35	3.38	99.06	n/a (VL <1000)
NSC_482	>2	<400	2.49	3.46	3.37	102.46	n/a (VL <1000)
NSC_483	>2	<400	1.58	3.38	3.62	93.4	n/a (VL <1000)
NSC_484	>2	<400	4.75	3.41	3.62	94.26	n/a (VL <1000)
NSC_485	>2	<400	5.5	3.4	3.65	93.08	n/a (VL <1000)
NSC_486	>2	<400	2.55	3.46	3.4	101.88	n/a (VL <1000)
NSC_487	>2	<400	0.35	3.24	3.33	97.24	n/a (VL <1000)
NSC_488	>2	<400	2.63	2.81	3.33	84.52	n/a (VL <1000)
NSC_489	>2	<400	3.26	3.36	3.38	99.23	n/a (VL <1000)
NSC_490	>2	<400	3.97	3.42	3.42	99.96	n/a (VL <1000)
NSC_491	>2	<400	6.55	3.41	3.42	99.56	n/a (VL <1000)
NSC_492	>2	<400	4.7	3.41	3.57	95.52	n/a (VL <1000)
NSC_493	>2	<400	2.42	3.28	3.56	92.03	n/a (VL <1000)
NSC_494	>2	<400	5.02	3.41	3.58	95.05	n/a (VL <1000)
NSC_495	>2	<400	5.71	3.39	3.6	94.26	n/a (VL <1000)
NSC_496	>2	<400	2.4	3.41	3.6	94.92	n/a (VL <1000)
NSC_497	>2	<400	5.1	3.32	3.4	97.62	n/a (VL <1000)
NSC_498	>2	<400	4.48	3.36	3.38	99.53	n/a (VL <1000)
NSC_499	>2	<400	4.31	3.41	3.59	94.87	n/a (VL <1000)
NSC_500	>2	<400	0.28	1.36	2.72	50.05	n/a (VL <1000)
NSC_501	>2	<400	1.32	2.71	3.33	81.48	n/a (VL <1000)
NSC_502	>2	<400	3.38	3.23	3.33	96.94	n/a (VL <1000)
NSC_503	>2	<400	3.96	3.33	3.4	97.79	n/a (VL <1000)
NSC_504	>2	<400	1.82	3.27	3.63	90.03	n/a (VL <1000)
NSC_505	>2	<400	5.52	3.51	3.36	104.32	n/a (VL <1000)
NSC_506	>2	<400	3.55	3.37	3.42	98.38	n/a (VL <1000)
NSC_507	>2	<400	5.4	3.42	3.65	93.75	n/a (VL <1000)
NSC_508	>2	<400	0.19	0.44	2.4	18.51	n/a (VL <1000)
NSC_509	>2	<400	4.18	3.4	3.62	93.79	n/a (VL <1000)
NSC_510	>2	<400	2.86	1.04	3.28	31.8	n/a (VL <1000)
NSC_511	>2	<400	4.18	3.52	3.38	104.03	n/a (VL <1000)
NSC_512	>2	<400	1.69	3.42	3.65	93.8	n/a (VL <1000)
NSC_513	>2	<400	3.94	3.39	3.44	98.53	n/a (VL <1000)
NSC_514	>2	<400	3.43	1.56	3.19	49.02	n/a (VL <1000)
NSC_515	>2	<400	1.86	3.45	3.44	100.27	n/a (VL <1000)
NSC_516	>2	<400	6.19	3.37	3.39	99.4	n/a (VL <1000)
NSC_517	>2	<400	3.43	3.21	3.38	94.88	n/a (VL <1000)
NSC_518	>2	<400	3.92	3.24	3.52	92.09	n/a (VL <1000)
NSC_519	>2	<400	4.88	3.45	3.68	93.72	n/a (VL <1000)
NSC_520	>2	<400	5.26	3.41	3.64	93.64	n/a (VL <1000)
NSC_521	>2	<400	6.4	3.46	3.45	100.1	n/a (VL <1000)
NSC_522	>2	<400	4.86	3.39	3.63	93.22	n/a (VL <1000)
NSC_523	>2	<400	4.92	3.43	3.45	99.56	n/a (VL <1000)
NSC_524	>2	<400	3.37	3.38	3.46	97.67	n/a (VL <1000)
NSC_525	>2	<400	4.02	3.11	3.35	92.92	n/a (VL <1000)
NSC_526	>2	<400	5.85	3.39	3.41	99.59	n/a (VL <1000)
NSC_527	>2	<400	4.71	3.5	3.42	102.44	n/a (VL <1000)
NSC_528	>2	<400	0.75	2.33	3.12	74.72	n/a (VL <1000)
NSC_529	>2	<400	4.5	3.43	3.4	100.89	n/a (VL <1000)
NSC_530	>2	<400	3.55	3.37	3.38	99.76	n/a (VL <1000)
NSC_531	>2	<400	6.23	3.36	3.36	99.79	n/a (VL <1000)
NSC_532	>2	<400	2.14	3.38	3.42	99.06	n/a (VL <1000)
NSC_533	>2	<400	5.68	3.5	3.4	103.06	n/a (VL <1000)
NSC_534	>2	<400	4.05	3.48	3.38	102.83	n/a (VL <1000)
NSC_535	>2	<400	0.13	0.2	0.62	32.63	n/a (VL <1000)
NSC_536	>2	<400	5.67	3.4	3.61	94.11	n/a (VL <1000)
NSC_537	>2	<400	1.96	3.1	3.32	93.41	n/a (VL <1000)
NSC_538	>2	<400	0.57	1.84	2.74	66.89	n/a (VL <1000)
NSC_539	>2	<400	3.52	3.41	3.63	93.8	n/a (VL <1000)
NSC_540	>2	<400	4.54	3.28	3.36	97.59	n/a (VL <1000)
NSC_541	>2	<400	1.71	3.36	3.57	94.16	n/a (VL <1000)
NSC_542	>2	<400	5.08	3.39	3.65	92.64	n/a (VL <1000)
NSC_543	>2	<400	4.31	3.34	3.38	98.83	n/a (VL <1000)
NSC_544	>2	<400	1.71	2.71	3.22	83.94	n/a (VL <1000)
NSC_545	>2	<400	2.28	3.42	3.3	103.52	n/a (VL <1000)
NSC_546	>2	<400	3.33	3.04	3.54	85.71	n/a (VL <1000)
NSC_547	>2	<400	4.83	3.38	3.36	100.52	n/a (VL <1000)
NSC_548	>2	<400	4.49	3.18	3.26	97.6	n/a (VL <1000)
NSC_549	>2	<400	3.79	3.36	3.43	98.06	n/a (VL <1000)
NSC_550	>2	<400	5.69	3.47	3.37	102.88	n/a (VL <1000)
NSC_551	>2	<400	5.52	3.4	3.39	100.14	n/a (VL <1000)
NSC_552	>2	<400	4.4	3.36	3.38	99.48	n/a (VL <1000)
NSC_553	>2	<400	1.67	3.22	3.24	99.54	n/a (VL <1000)
NSC_554	>2	<400	1.81	3.42	3.65	93.66	n/a (VL <1000)
NSC_555	>2	<400	3.86	3.01	3.37	89.33	n/a (VL <1000)
NSC_556	>2	<400	3.64	3.32	3.35	98.98	n/a (VL <1000)
NSC_557	>2	<400	5.26	3.42	3.35	102.13	n/a (VL <1000)
NSC_558	>2	<400	6.09	3.39	3.38	100.28	n/a (VL <1000)
NSC_559	>2	<400	5.23	3.4	3.56	95.71	n/a (VL <1000)
NSC_560	>2	<400	1.71	3.35	3.36	99.68	n/a (VL <1000)
NSC_561	>2	<400	4.95	3.37	3.41	98.68	n/a (VL <1000)
NSC_562	>2	<400	5.33	3.42	3.47	98.61	n/a (VL <1000)
NSC_563	>2	<400	5.9	3.4	3.41	99.71	n/a (VL <1000)
NSC_564	>2	<400	4.45	2.73	3.26	83.88	n/a (VL <1000)
NSC_565	>2	<400	5.75	3.35	3.44	97.2	n/a (VL <1000)
NSC_566	>2	<400	3.32	3.36	3.66	91.84	n/a (VL <1000)
NSC_567	>2	<400	2.11	2.58	3.25	79.39	n/a (VL <1000)
NSC_568	>2	<400	3.06	3.48	3.38	103.15	n/a (VL <1000)
NSC_569	>2	<400	0.67	2.03	2.6	78.3	n/a (VL <1000)
NSC_570	>2	<400	2.52	3.19	3.31	96.43	n/a (VL <1000)
NSC_571	>2	<400	2.09	3.43	3.38	101.64	n/a (VL <1000)
NSC_572	>2	<400	1.93	3.47	3.38	102.71	n/a (VL <1000)
NSC_573	>2	<400	2.24	3.25	3.36	96.55	n/a (VL <1000)
NSC_574	>2	<400	5.05	3.42	3.4	100.54	n/a (VL <1000)
NSC_575	>2	<400	6.46	3.39	3.39	100.01	n/a (VL <1000)
NSC_576	>2	<400	5.82	3.44	3.45	99.91	n/a (VL <1000)
NSC_577	>2	<400	4.88	3.31	3.37	98.18	n/a (VL <1000)
NSC_578	>2	<400	4.41	3.38	3.4	99.55	n/a (VL <1000)
NSC_579	>2	<400	4.9	3.26	3.35	97.38	n/a (VL <1000)
NSC_580	>2	<400	0.61	2.78	3.33	83.35	n/a (VL <1000)
NSC_581	>2	<400	5.05	3.39	3.44	98.47	n/a (VL <1000)
NSC_582	>2	<400	0.68	3.17	3.5	90.41	n/a (VL <1000)
NSC_583	>2	<400	5.55	3.48	3.46	100.57	n/a (VL <1000)
NSC_584	>2	<400	2.8	3.4	3.45	98.71	n/a (VL <1000)
NSC_585	>2	<400	5.65	3.18	3.33	95.53	n/a (VL <1000)
NSC_586	>2	<400	2.91	3.23	3.38	95.34	n/a (VL <1000)
NSC_587	>2	<400	5.21	3.41	3.36	101.55	n/a (VL <1000)
NSC_588	>2	<400	3.3	3.45	3.35	102.92	n/a (VL <1000)
NSC_589	>2	<400	2.57	3.15	3.31	95.1	n/a (VL <1000)
NSC_590	>2	<400	3.81	3.51	3.39	103.66	n/a (VL <1000)
NSC_591	>2	<400	4.96	3.39	3.39	100.14	n/a (VL <1000)
NSC_592	>2	<400	2.34	3.2	3.34	95.77	n/a (VL <1000)
NSC_593	>2	<400	5.87	3.41	3.39	100.45	n/a (VL <1000)
NSC_594	>2	<400	5.05	3.35	3.37	99.43	n/a (VL <1000)
NSC_595	>2	<400	5.68	3.35	3.42	97.95	n/a (VL <1000)
NSC_596	>2	<400	4.25	3.34	3.6	92.89	n/a (VL <1000)
NSC_597	>2	<400	4.48	3.48	3.42	101.71	n/a (VL <1000)
NSC_598	>2	<400	5.41	3.43	3.39	100.94	n/a (VL <1000)
NSC_599	>2	<400	1.89	2.1	3.27	64.12	n/a (VL <1000)
NSC_600	>2	<400	5.62	3.51	3.39	103.77	n/a (VL <1000)
NSC_601	>2	<400	4.68	3.41	3.36	101.6	n/a (VL <1000)
NSC_602	>2	<400	2.69	3.42	3.65	93.66	n/a (VL <1000)
NSC_603	>2	<400	3.35	3.41	3.38	100.71	n/a (VL <1000)
NSC_604	>2	<400	0.43	2.67	3.36	79.35	n/a (VL <1000)
NSC_605	>2	<400	2.65	3.41	3.43	99.47	n/a (VL <1000)
NSC_606	>2	<400	3.16	3.43	3.38	101.44	n/a (VL <1000)
NSC_607	>2	<400	5.39	3.43	3.63	94.47	n/a (VL <1000)
NSC_608	>2	<400	3.27	3.48	3.63	95.84	n/a (VL <1000)
NSC_609	>2	<400	0.49	1.93	3.24	59.59	n/a (VL <1000)
NSC_610	>2	<400	1.68	3.38	3.33	101.52	n/a (VL <1000)
NSC_611	>2	<400	2.74	3.21	3.37	95.24	n/a (VL <1000)
NSC_612	>2	<400	2.08	3.31	3.35	98.62	n/a (VL <1000)
NSC_613	>2	<400	2.76	3.15	3.4	92.65	n/a (VL <1000)
NSC_614	>2	<400	3.68	3.17	3.61	87.71	n/a (VL <1000)
NSC_615	>2	<400	4.3	3.42	3.61	94.55	n/a (VL <1000)
NSC_616	>2	<400	1.45	3.24	3.61	89.66	n/a (VL <1000)
NSC_617	>2	<400	5.5	3.31	3.43	96.61	n/a (VL <1000)
NSC_618	>2	<400	3.07	3.33	3.37	98.79	n/a (VL <1000)
NSC_619	>2	<400	2.24	3.35	3.34	100.45	n/a (VL <1000)
NSC_620	>2	<400	5.1	3.44	3.45	99.51	n/a (VL <1000)
NSC_621	>2	<400	5.24	3.37	3.4	99.33	n/a (VL <1000)
NSC_622	>2	<400	5.06	3.44	3.42	100.46	n/a (VL <1000)
NSC_623	>2	<400	2.67	0.53	3.35	15.92	n/a (VL <1000)
NSC_624	>2	<400	4.14	3.37	3.39	99.67	n/a (VL <1000)
NSC_625	>2	<400	4.57	3.43	3.47	98.66	n/a (VL <1000)
NSC_626	>2	<400	2.73	3.37	3.39	99.31	n/a (VL <1000)
NSC_627	>2	<400	4.7	3.29	3.39	97.17	n/a (VL <1000)
NSC_628	>2	<400	0.75	1.48	2.76	53.75	n/a (VL <1000)
NSC_629	>2	<400	5.38	3.37	3.35	100.5	n/a (VL <1000)
NSC_630	>2	<400	3.09	3.4	3.38	100.36	n/a (VL <1000)
NSC_631	>2	<400	2.43	3.43	3.32	103.34	n/a (VL <1000)
NSC_632	>2	<400	4.38	3.42	3.62	94.54	n/a (VL <1000)
NSC_633	>2	<400	3.86	3.46	3.39	101.97	n/a (VL <1000)
NSC_634	>2	<400	0.24	2.49	3.5	71.26	n/a (VL <1000)
NSC_635	>2	<400	5.72	3.39	3.42	99.22	n/a (VL <1000)
NSC_636	>2	<400	0.68	2.48	3.12	79.46	n/a (VL <1000)
NSC_637	>2	<400	2.83	3.3	3.61	91.54	n/a (VL <1000)
NSC_638	>2	<400	3.83	2.42	3.23	74.94	n/a (VL <1000)
NSC_639	>2	<400	4.86	3.5	3.4	102.95	n/a (VL <1000)
NSC_640	>2	<400	0.73	3.36	3.27	102.71	n/a (VL <1000)
NSC_641	>2	<400	2.05	3.24	3.62	89.42	n/a (VL <1000)
NSC_642	>2	<400	1.83	3.44	3.37	101.99	n/a (VL <1000)
NSC_643	>2	<400	4.62	3.12	3.36	92.79	n/a (VL <1000)
NSC_644	>2	<400	3.45	3.43	3.36	102.17	n/a (VL <1000)
NSC_645	>2	<400	6.33	3.5	3.4	102.74	n/a (VL <1000)
NSC_646	>2	<400	2.9	3.39	3.58	94.61	n/a (VL <1000)
NSC_647	>2	<400	3.47	3.5	3.35	104.56	n/a (VL <1000)
NSC_648	>2	<400	3	3.38	3.38	99.95	n/a (VL <1000)
NSC_649	>2	<400	3.68	3.37	3.32	101.38	n/a (VL <1000)
NSC_650	>2	<400	3.27	3.39	3.56	95.23	n/a (VL <1000)
NSC_651	>2	<400	6.42	3.39	3.4	99.72	n/a (VL <1000)
NSC_652	>2	<400	3.24	3.43	3.66	93.85	n/a (VL <1000)
NSC_653	>2	<400	1.44	3.41	3.57	95.47	n/a (VL <1000)
NSC_654	>2	<400	2.77	3.43	3.42	100.16	n/a (VL <1000)
NSC_655	>2	<400	2.62	3.34	3.58	93.3	n/a (VL <1000)
NSC_656	>2	<400	5.18	3.48	3.4	102.5	n/a (VL <1000)
NSC_657	>2	<400	5.42	3.39	3.36	100.75	n/a (VL <1000)
NSC_658	>2	<400	4.59	3.41	3.57	95.42	n/a (VL <1000)
NSC_659	>2	<400	2.67	2.62	3.37	77.6	n/a (VL <1000)
NSC_660	>2	<400	5.79	3.38	3.61	93.73	n/a (VL <1000)
NSC_661	>2	<400	4.58	3.43	3.44	99.94	n/a (VL <1000)
NSC_662	>2	<400	5.63	3.45	3.63	94.92	n/a (VL <1000)
NSC_663	>2	<400	4.62	3.43	3.4	100.89	n/a (VL <1000)
NSC_664	>2	<400	1.93	3.2	3.31	96.51	n/a (VL <1000)
NSC_665	>2	<400	4.72	3.38	3.65	92.55	n/a (VL <1000)
NSC_666	>2	<400	1.8	3.43	3.35	102.28	n/a (VL <1000)
NSC_667	>2	<400	3.52	3.33	3.34	99.68	n/a (VL <1000)
NSC_668	>2	<400	4.77	3.41	3.41	100.13	n/a (VL <1000)
NSC_669	>2	<400	2.23	3.32	3.54	93.69	n/a (VL <1000)
NSC_670	>2	<400	2.91	3.36	3.39	99.19	n/a (VL <1000)
NSC_671	>2	<400	3.2	3.48	3.48	99.96	n/a (VL <1000)
NSC_672	>2	<400	4.74	3.38	3.43	98.68	n/a (VL <1000)
NSC_673	>2	<400	2.74	3.41	3.63	94.03	n/a (VL <1000)
NSC_674	>2	<400	0.86	2.09	3.2	65.36	n/a (VL <1000)
NSC_675	>2	<400	0.22	1.85	3.01	61.39	n/a (VL <1000)
NSC_676	>2	<400	0.75	3.32	3.42	96.9	n/a (VL <1000)
NSC_677	>2	<400	2.39	3.48	3.39	102.76	n/a (VL <1000)
NSC_678	>2	<400	4.07	3.27	3.62	90.49	n/a (VL <1000)
NSC_679	>2	<400	2.95	2.72	3.18	85.39	n/a (VL <1000)
NSC_680	>2	<400	3.31	3.22	3.38	95.27	n/a (VL <1000)
NSC_681	>2	<400	2.67	3.27	3.4	96.12	n/a (VL <1000)
NSC_682	>2	<400	5.3	3.33	3.43	97.1	n/a (VL <1000)
NSC_683	>2	<400	6.95	3.49	3.38	103.25	n/a (VL <1000)
NSC_684	>2	<400	2.15	2.32	3.25	71.24	n/a (VL <1000)
NSC_685	>2	<400	4.05	3.22	3.36	95.73	n/a (VL <1000)
NSC_686	>2	<400	4.85	3.31	3.35	98.69	n/a (VL <1000)
NSC_687	>2	<400	4.24	3.48	3.39	102.7	n/a (VL <1000)
NSC_688	>2	<400	0.63	2.16	3.25	66.49	n/a (VL <1000)
NSC_689	>2	<400	2.66	3.05	3.35	91.14	n/a (VL <1000)
NSC_690	>2	<400	1.56	3.14	3.33	94.45	n/a (VL <1000)
NSC_691	>2	<400	3.8	3.38	3.59	94.2	n/a (VL <1000)
NSC_692	>2	<400	3.65	3.36	3.38	99.38	n/a (VL <1000)
NSC_693	>2	<400	2.47	3.26	3.3	98.53	n/a (VL <1000)
NSC_694	>2	<400	4.58	3.48	3.45	100.85	n/a (VL <1000)
NSC_695	>2	<400	4.78	3.37	3.37	100.12	n/a (VL <1000)
NSC_696	>2	<400	3.7	2.79	3.38	82.59	n/a (VL <1000)
NSC_697	>2	<400	3.07	3.31	3.36	98.44	n/a (VL <1000)
NSC_698	>2	<400	3.05	3.37	3.6	93.69	n/a (VL <1000)
NSC_699	>2	<400	4.66	3.17	3.58	88.77	n/a (VL <1000)
NSC_700	>2	<400	0.4	2.02	2.79	72.47	n/a (VL <1000)
NSC_701	>2	<400	0.98	2.33	3.35	69.61	n/a (VL <1000)
NSC_702	>2	<400	4.66	3.33	3.36	99.02	n/a (VL <1000)
NSC_703	>2	<400	1.85	3.22	3.38	95.36	n/a (VL <1000)
NSC_704	>2	<400	3.15	3.28	3.38	97.23	n/a (VL <1000)
NSC_705	>2	<400	4.25	3.42	3.37	101.43	n/a (VL <1000)
NSC_706	>2	<400	2.39	3.38	3.39	99.48	n/a (VL <1000)
NSC_707	>2	<400	2.36	3.37	3.46	97.46	n/a (VL <1000)
NSC_708	>2	<400	5.12	3.36	3.62	92.71	n/a (VL <1000)
NSC_709	>2	<400	0.84	0.79	2.53	31.12	n/a (VL <1000)
NSC_710	>2	<400	3.98	3.32	3.63	91.43	n/a (VL <1000)
NSC_711	>2	<400	3.84	3.39	3.44	98.64	n/a (VL <1000)
NSC_712	>2	<400	4.09	3.4	3.42	99.47	n/a (VL <1000)
NSC_713	>2	<400	4.09	3.47	3.34	103.9	n/a (VL <1000)
NSC_714	>2	<400	5.53	3.47	3.4	102.04	n/a (VL <1000)
NSC_715	>2	<400	0.53	2.34	3.08	75.89	n/a (VL <1000)
NSC_716	>2	<400	1.14	3.21	3.39	94.75	n/a (VL <1000)
NSC_717	>2	<400	3.14	3.47	3.41	101.77	n/a (VL <1000)
NSC_718	>2	<400	5.32	3.09	3.6	85.81	n/a (VL <1000)
NSC_719	>2	<400	5.05	3.42	3.37	101.58	n/a (VL <1000)
NSC_720	>2	<400	3.23	2.9	3.34	86.81	n/a (VL <1000)
NSC_721	>2	<400	0.89	3.44	3.4	101.12	n/a (VL <1000)
NSC_722	>2	<400	1.45	3.26	3.31	98.46	n/a (VL <1000)
NSC_723	>2	<400	4.8	3.38	3.54	95.56	n/a (VL <1000)
NSC_724	>2	<400	4.67	3.39	3.64	93.31	n/a (VL <1000)
NSC_725	>2	<400	4.12	3.36	3.4	98.59	n/a (VL <1000)
NSC_726	>2	<400	2.07	3.47	3.45	100.61	n/a (VL <1000)
NSC_727	>2	<400	1.36	2.98	3.26	91.32	n/a (VL <1000)
NSC_728	>2	<400	2.46	0.71	2.73	25.9	n/a (VL <1000)
NSC_729	>2	<400	5.11	3.38	3.4	99.36	n/a (VL <1000)
NSC_730	>2	<400	3.26	3.33	3.35	99.38	n/a (VL <1000)
NSC_731	>2	<400	1.57	3.04	3.62	84.04	n/a (VL <1000)
NSC_732	>2	<400	2.42	3.42	3.43	99.59	n/a (VL <1000)
NSC_733	>2	<400	1.53	3.38	3.59	94.1	n/a (VL <1000)
NSC_734	>2	<400	4.03	3.39	3.4	99.69	n/a (VL <1000)
NSC_735	>2	<400	2.66	3.33	3.64	91.36	n/a (VL <1000)
NSC_736	>2	<400	3.07	3.46	3.38	102.58	n/a (VL <1000)
NSC_737	>2	<400	4.82	3.46	3.44	100.44	n/a (VL <1000)
NSC_738	>2	<400	2.7	3.37	3.39	99.26	n/a (VL <1000)
NSC_739	>2	<400	4.47	3.38	3.44	98.18	n/a (VL <1000)
NSC_740	>2	<400	3.45	3.29	3.56	92.33	n/a (VL <1000)
NSC_741	>2	<400	3.09	3.49	3.45	101.17	n/a (VL <1000)
NSC_742	>2	<400	4.55	3.53	3.36	105.06	n/a (VL <1000)
NSC_743	>2	<400	1.45	2.82	3.32	85.08	n/a (VL <1000)
NSC_744	>2	<400	3.14	3.43	3.38	101.39	n/a (VL <1000)
NSC_745	>2	<400	4.2	3.38	3.42	98.79	n/a (VL <1000)
NSC_746	>2	<400	5.84	3.36	3.41	98.61	n/a (VL <1000)
NSC_747	>2	<400	3.64	3.38	3.45	97.94	n/a (VL <1000)
NSC_748	>2	<400	0.56	3.39	3.39	100.19	n/a (VL <1000)
NSC_749	>2	<400	4.78	3.44	3.65	94.25	n/a (VL <1000)
NSC_750	>2	<400	0.71	2.82	3.43	82.09	n/a (VL <1000)
NSC_751	>2	<400	1.43	3.17	3.3	96.08	n/a (VL <1000)
NSC_752	>2	<400	4.19	3.36	3.38	99.4	n/a (VL <1000)
NSC_753	>2	<400	0.75	3.13	3.32	94.33	n/a (VL <1000)
NSC_754	>2	<400	5.1	3.38	3.41	99.07	n/a (VL <1000)
NSC_755	>2	<400	2.95	3.44	3.63	94.62	n/a (VL <1000)
NSC_756	>2	<400	6.72	3.48	3.41	102.28	n/a (VL <1000)
NSC_757	>2	<400	5.89	3.34	3.39	98.76	n/a (VL <1000)
NSC_758	>2	<400	4.72	3.46	3.38	102.48	n/a (VL <1000)
NSC_759	>2	<400	1.98	3.29	3.54	92.71	n/a (VL <1000)
NSC_760	>2	<400	3.43	3.39	3.41	99.46	n/a (VL <1000)
NSC_761	>2	<400	4.8	3.28	3.34	98.03	n/a (VL <1000)
NSC_762	>2	<400	5.44	3.44	3.41	100.92	n/a (VL <1000)
NSC_763	>2	<400	2.93	3.4	3.65	93.17	n/a (VL <1000)
NSC_764	>2	<400	2.8	3.44	3.42	100.75	n/a (VL <1000)
NSC_765	>2	<400	2.31	3.4	3.64	93.47	n/a (VL <1000)
NSC_766	>2	<400	4.36	3.32	3.4	97.69	n/a (VL <1000)
NSC_767	>2	<400	0.29	2.47	2.99	82.73	n/a (VL <1000)
NSC_768	>2	<400	5.92	3.53	3.4	103.9	n/a (VL <1000)
NSC_769	>2	<400	1.34	2.81	3.22	87.19	n/a (VL <1000)
NSC_770	>2	<400	6.05	3.4	3.4	99.88	n/a (VL <1000)
NSC_771	>2	<400	4.42	3.15	3.39	92.91	n/a (VL <1000)
NSC_772	>2	<400	2.16	0.65	2.79	23.22	n/a (VL <1000)
NSC_773	>2	<400	1.5	3.42	3.37	101.59	n/a (VL <1000)
NSC_774	>2	<400	6.11	3.39	3.61	93.87	n/a (VL <1000)
NSC_775	>2	<400	4.15	3.48	3.45	100.77	n/a (VL <1000)
NSC_776	>2	<400	4.3	3.44	3.56	96.66	n/a (VL <1000)
NSC_777	>2	<400	2.07	3.36	3.56	94.58	n/a (VL <1000)
NSC_778	>2	<400	5.35	3.31	3.37	98.27	n/a (VL <1000)
NSC_779	>2	<400	3.93	3.41	3.59	95.23	n/a (VL <1000)
NSC_780	>2	<400	3.6	3.26	3.38	96.68	n/a (VL <1000)
NSC_781	>2	<400	3.8	3.32	3.57	92.98	n/a (VL <1000)
NSC_782	>2	<400	1.73	3.17	3.37	94.08	n/a (VL <1000)
NSC_783	>2	<400	1.18	2.4	3.25	73.82	n/a (VL <1000)
NSC_784	>2	<400	5.11	3.42	3.42	100.05	n/a (VL <1000)
NSC_785	>2	<400	3.11	3.34	3.4	98.13	n/a (VL <1000)
NSC_786	>2	<400	0.43	0.37	0.97	37.68	n/a (VL <1000)
NSC_787	>2	<400	4.96	3.4	3.65	93.08	n/a (VL <1000)
NSC_788	>2	<400	3.23	3.35	3.38	99.26	n/a (VL <1000)
NSC_789	>2	<400	5.11	3.35	3.65	91.82	n/a (VL <1000)
NSC_790	>2	<400	1.41	3.33	3.39	98.02	n/a (VL <1000)
NSC_791	>2	<400	2.04	2.4	3.29	72.8	n/a (VL <1000)
NSC_792	>2	<400	1.52	3.09	3.4	90.93	n/a (VL <1000)
NSC_793	>2	<400	5.33	3.46	3.64	94.96	n/a (VL <1000)
NSC_794	>2	<400	0.89	3.36	3.45	97.5	n/a (VL <1000)
NSC_795	>2	<400	1.88	3.38	3.58	94.46	n/a (VL <1000)
NSC_796	>2	<400	2.72	3.42	3.43	99.64	n/a (VL <1000)
NSC_797	>2	<400	5.52	3.45	3.37	102.2	n/a (VL <1000)
NSC_798	>2	<400	1.91	3.3	3.3	99.98	n/a (VL <1000)
NSC_799	>2	<400	4.85	3.35	3.38	99.18	n/a (VL <1000)
NSC_800	>2	<400	2.26	3.12	3.31	94.06	n/a (VL <1000)
NSC_801	>2	<400	4.35	3.43	3.62	94.71	n/a (VL <1000)
NSC_802	>2	<400	4.4	3.23	3.6	89.56	n/a (VL <1000)
NSC_803	>2	<400	4.36	3.44	3.4	101	n/a (VL <1000)
NSC_804	>2	<400	4.95	3.29	3.37	97.68	n/a (VL <1000)
NSC_805	>2	<400	2.67	3.34	3.35	99.56	n/a (VL <1000)
NSC_806	>2	<400	4.91	3.43	3.66	93.6	n/a (VL <1000)
NSC_807	>2	<400	1.75	3.35	3.57	93.9	n/a (VL <1000)
NSC_808	>2	<400	4.64	3.27	3.44	94.95	n/a (VL <1000)
NSC_809	>2	<400	0.63	1.56	2.66	58.71	n/a (VL <1000)
NSC_810	>2	<400	4.98	3.46	3.37	102.69	n/a (VL <1000)
NSC_811	>2	<400	4.43	3.43	3.36	102.01	n/a (VL <1000)
NSC_812	>2	<400	1.19	3.21	3.37	95.38	n/a (VL <1000)
NSC_813	>2	<400	5.62	3.48	3.38	102.94	n/a (VL <1000)
NSC_814	>2	<400	3.15	3.38	3.38	100	n/a (VL <1000)
NSC_815	>2	<400	0.71	1.84	3.17	57.99	n/a (VL <1000)
NSC_816	>2	<400	4.65	3.41	3.42	99.6	n/a (VL <1000)
NSC_817	>2	<400	2.74	3.25	3.59	90.5	n/a (VL <1000)
NSC_818	>2	<400	3.81	3.38	3.38	100.12	n/a (VL <1000)
NSC_819	>2	<400	3.45	3.25	3.4	95.58	n/a (VL <1000)
NSC_820	>2	<400	3.01	3.39	3.44	98.54	n/a (VL <1000)
NSC_821	>2	<400	5.52	3.38	3.4	99.38	n/a (VL <1000)
NSC_822	>2	<400	5.82	3.37	3.41	98.98	n/a (VL <1000)
NSC_823	>2	<400	5.56	3.46	3.41	101.54	n/a (VL <1000)
NSC_824	>2	<400	4.51	0.93	3.57	26.06	n/a (VL <1000)
NSC_825	>2	<400	4.73	3.39	3.58	94.68	n/a (VL <1000)
NSC_826	>2	<400	3.2	3.39	3.35	101.1	n/a (VL <1000)
NSC_827	>2	<400	4.11	3.41	3.34	102.09	n/a (VL <1000)
NSC_828	>2	<400	3.16	3.3	3.54	93.15	n/a (VL <1000)
NSC_829	>2	<400	1.76	3.37	3.28	102.8	n/a (VL <1000)
NSC_830	>2	<400	2.72	3.38	3.63	93.25	n/a (VL <1000)
NSC_831	>2	<400	4.84	3.42	3.4	100.52	n/a (VL <1000)
NSC_832	>2	<400	2.51	3.34	3.37	99.17	n/a (VL <1000)
NSC_833	>2	<400	2.3	3.38	3.61	93.6	n/a (VL <1000)
NSC_834	>2	<400	4.6	3.39	3.62	93.61	n/a (VL <1000)
NSC_835	>2	<400	4.32	3.42	3.38	101.25	n/a (VL <1000)
NSC_836	>2	<400	0.3	0.34	0.66	51.81	n/a (VL <1000)
NSC_837	>2	<400	3.85	3.41	3.4	100.48	n/a (VL <1000)
NSC_838	>2	<400	5.09	3.5	3.39	103.41	n/a (VL <1000)
NSC_839	>2	<400	5.34	3.4	3.41	99.91	n/a (VL <1000)
NSC_840	>2	<400	1.63	3.32	3.6	92.22	n/a (VL <1000)
NSC_841	>2	<400	2.05	3.38	3.4	99.38	n/a (VL <1000)
NSC_842	>2	<400	4.43	3.41	3.37	101.25	n/a (VL <1000)
NSC_843	>2	<400	4.06	3.35	3.37	99.15	n/a (VL <1000)
NSC_844	>2	<400	0.74	2.54	3.26	77.71	n/a (VL <1000)
NSC_845	>2	<400	6.45	3.48	3.39	102.72	n/a (VL <1000)
NSC_846	>2	<400	0.97	2.95	3.29	89.68	n/a (VL <1000)
NSC_847	>2	<400	5.79	3.45	3.62	95.3	n/a (VL <1000)
NSC_848	>2	<400	3.72	3.34	3.39	98.66	n/a (VL <1000)
NSC_849	>2	<400	4.63	3.38	3.43	98.68	n/a (VL <1000)
NSC_850	>2	<400	5.25	3.37	3.41	98.83	n/a (VL <1000)
NSC_851	>2	<400	2.23	3.41	3.38	100.78	n/a (VL <1000)
NSC_852	>2	<400	1.92	3.16	3.39	93.43	n/a (VL <1000)
NSC_853	>2	<400	6.31	3.39	3.41	99.26	n/a (VL <1000)
NSC_854	>2	<400	3.66	3.53	3.39	104.03	n/a (VL <1000)
NSC_855	>2	<400	1.52	3.35	3.36	99.69	n/a (VL <1000)
NSC_856	>2	<400	2.68	3.34	3.39	98.28	n/a (VL <1000)
NSC_857	>2	<400	1.26	3.04	3.5	86.76	n/a (VL <1000)
NSC_858	>2	<400	4.59	3.34	3.55	94.19	n/a (VL <1000)
NSC_859	>2	<400	4.86	3.39	3.4	99.62	n/a (VL <1000)
NSC_860	>2	<400	4.05	3.31	3.35	98.87	n/a (VL <1000)
NSC_861	>2	<400	0.69	3.27	3.37	96.78	n/a (VL <1000)
NSC_862	>2	<400	2.51	3.45	3.43	100.53	n/a (VL <1000)
NSC_863	>2	<400	4.5	3.43	3.44	99.98	n/a (VL <1000)
NSC_864	>2	<400	3.92	3.22	3.64	88.43	n/a (VL <1000)
NSC_865	>2	<400	1.05	2.01	3.02	66.56	n/a (VL <1000)
NSC_866	>2	<400	2.43	3.24	3.35	96.64	n/a (VL <1000)
NSC_867	>2	<400	5.27	3.42	3.62	94.53	n/a (VL <1000)
NSC_868	>2	<400	4.98	3.49	3.43	101.51	n/a (VL <1000)
NSC_869	>2	<400	3.24	3.53	3.4	104.02	n/a (VL <1000)
NSC_870	>2	<400	1.31	3.13	3.58	87.58	n/a (VL <1000)
NSC_871	>2	<400	2.09	3.21	3.37	95.17	n/a (VL <1000)
NSC_872	>2	<400	0.7	2.83	3.37	84.16	n/a (VL <1000)
NSC_873	>2	<400	3.84	3.4	3.42	99.25	n/a (VL <1000)
NSC_874	>2	<400	0.71	3.11	3.56	87.4	n/a (VL <1000)
NSC_875	>2	<400	0.17	1.69	2.28	73.88	n/a (VL <1000)
NSC_876	>2	<400	4.5	3.29	3.41	96.62	n/a (VL <1000)
NSC_877	>2	<400	2.98	3.31	3.36	98.33	n/a (VL <1000)
NSC_878	>2	<400	2.84	3.41	3.61	94.48	n/a (VL <1000)
NSC_879	>2	<400	3.63	3.51	3.37	104	n/a (VL <1000)
NSC_880	>2	<400	3.82	3.41	3.65	93.53	n/a (VL <1000)
NSC_881	>2	<400	2.87	3.39	3.43	98.97	n/a (VL <1000)
NSC_882	>2	<400	3.89	3.26	3.33	97.92	n/a (VL <1000)
NSC_883	>2	<400	3.83	3.36	3.41	98.46	n/a (VL <1000)
NSC_884	>2	<400	3.56	3.43	3.45	99.22	n/a (VL <1000)
NSC_885	>2	<400	0.27	1.99	2.9	68.82	n/a (VL <1000)
NSC_886	>2	<400	4.19	3.3	3.59	91.91	n/a (VL <1000)
NSC_887	>2	<400	5.4	3.43	3.41	100.66	n/a (VL <1000)
NSC_888	>2	<400	5.1	3.42	3.62	94.39	n/a (VL <1000)
NSC_889	>2	<400	4.37	3.43	3.43	100	n/a (VL <1000)
NSC_890	>2	<400	2.2	3.43	3.63	94.44	n/a (VL <1000)
NSC_891	>2	<400	3.21	3.35	3.38	99.02	n/a (VL <1000)
NSC_892	>2	<400	1.83	2.83	3.34	84.75	n/a (VL <1000)
NSC_893	>2	<400	5.03	3.41	3.43	99.32	n/a (VL <1000)
NSC_894	>2	<400	2.84	3.36	3.61	92.97	n/a (VL <1000)
NSC_895	>2	<400	3.2	3.42	3.63	94.42	n/a (VL <1000)
NSC_896	>2	<400	1.63	2.3	3.38	68.05	n/a (VL <1000)
NSC_897	>2	<400	3.01	3.38	3.41	98.9	n/a (VL <1000)
NSC_898	>2	<400	3.42	3.46	3.38	102.4	n/a (VL <1000)
NSC_899	>2	<400	1.1	2.9	3.31	87.73	n/a (VL <1000)
NSC_900	>2	<400	3.12	3.34	3.36	99.46	n/a (VL <1000)
NSC_901	>2	<400	1.46	3.39	3.35	101.17	n/a (VL <1000)
NSC_902	>2	<400	1.28	1.46	3.53	41.38	n/a (VL <1000)
NSC_903	>2	<400	4.4	3.36	3.35	100.27	n/a (VL <1000)
NSC_904	>2	<400	2.76	3.4	3.42	99.39	n/a (VL <1000)
NSC_905	>2	<400	4.66	3.44	3.43	100.34	n/a (VL <1000)
NSC_906	>2	<400	3.56	3.41	3.43	99.44	n/a (VL <1000)
NSC_907	>2	<400	3	3.54	3.39	104.32	n/a (VL <1000)
NSC_908	>2	<400	0.24	2.84	2.91	97.31	n/a (VL <1000)
NSC_909	>2	<400	3.01	3.07	3.34	91.92	n/a (VL <1000)
NSC_910	>2	<400	1.65	2.36	2.99	78.92	n/a (VL <1000)
NSC_911	>2	<400	2.5	3.37	3.39	99.42	n/a (VL <1000)
NSC_912	>2	<400	1.3	2.49	3.31	75.2	n/a (VL <1000)
NSC_913	>2	<400	3.08	3.43	3.4	100.87	n/a (VL <1000)
NSC_914	>2	<400	5.36	3.44	3.65	94.4	n/a (VL <1000)
NSC_915	>2	<400	0.86	3	3.34	89.9	n/a (VL <1000)
NSC_916	>2	<400	2.44	3.35	3.59	93.35	n/a (VL <1000)
NSC_917	>2	<400	3.01	3.04	3.32	91.72	n/a (VL <1000)
NSC_918	>2	<400	1.91	3.32	3.43	97.04	n/a (VL <1000)
NSC_919	>2	<400	2.87	3.41	3.55	95.94	n/a (VL <1000)
NSC_920	>2	<400	5.75	3.46	3.39	102.07	n/a (VL <1000)
NSC_921	>2	<400	1.17	3.01	3.37	89.53	n/a (VL <1000)
NSC_922	>2	<400	1.97	3.23	3.64	88.64	n/a (VL <1000)
NSC_923	>2	<400	2.87	3.35	3.42	97.86	n/a (VL <1000)
NSC_924	>2	<400	1.45	2.87	3.25	88.41	n/a (VL <1000)
NSC_925	>2	<400	5.33	3.38	3.63	93.17	n/a (VL <1000)
NSC_926	>2	<400	2.95	2.93	3.33	87.93	n/a (VL <1000)
NSC_927	>2	<400	1.95	3.37	3.27	102.89	n/a (VL <1000)
NSC_928	>2	<400	3.05	3.42	3.33	102.72	n/a (VL <1000)
NSC_929	>2	<400	4.02	3.37	3.41	98.76	n/a (VL <1000)
NSC_930	>2	<400	4.68	3.4	3.42	99.29	n/a (VL <1000)
NSC_931	>2	<400	1.61	3.4	3.42	99.37	n/a (VL <1000)
NSC_932	>2	<400	1.14	2.66	3.26	81.6	n/a (VL <1000)
NSC_933	>2	<400	2.1	3.38	3.39	99.68	n/a (VL <1000)
NSC_934	>2	<400	5.72	3.42	3.47	98.55	n/a (VL <1000)
NSC_935	>2	<400	2.28	3.44	3.61	95.34	n/a (VL <1000)
NSC_936	>2	<400	3.52	3.35	3.37	99.24	n/a (VL <1000)
NSC_937	>2	<400	2.69	3.4	3.44	98.95	n/a (VL <1000)
NSC_938	>2	<400	2.29	2.95	3.33	88.72	n/a (VL <1000)
NSC_939	>2	<400	0.94	2.64	3.27	80.76	n/a (VL <1000)
NSC_940	>2	<400	4.87	3.34	3.43	97.3	n/a (VL <1000)
NSC_941	>2	<400	6	3.42	3.59	95.36	n/a (VL <1000)
NSC_942	>2	<400	5.3	3.37	3.65	92.43	n/a (VL <1000)
NSC_943	>2	<400	2.97	3.51	3.38	103.72	n/a (VL <1000)
NSC_944	>2	<400	1.62	2.78	3.32	83.72	n/a (VL <1000)
NSC_945	>2	<400	4.87	3.43	3.59	95.57	n/a (VL <1000)
NSC_946	>2	<400	0.2	1.73	2.05	84.16	n/a (VL <1000)
NSC_947	>2	<400	3.49	3.4	3.42	99.64	n/a (VL <1000)
NSC_948	>2	<400	2.84	3.36	3.35	100.22	n/a (VL <1000)
NSC_949	>2	<400	5.18	3.44	3.4	101.13	n/a (VL <1000)
NSC_950	>2	<400	5.89	3.4	3.4	99.92	n/a (VL <1000)
NSC_951	>2	<400	3.75	3.41	3.37	101.23	n/a (VL <1000)
NSC_952	>2	<400	0.13	1.01	1.79	56.12	n/a (VL <1000)
NSC_953	>2	<400	4.36	3.07	3.44	89.19	n/a (VL <1000)
NSC_954	>2	<400	4.12	3.31	3.62	91.51	n/a (VL <1000)
NSC_955	>2	<400	5.06	3.38	3.41	99.3	n/a (VL <1000)
NSC_956	>2	<400	1.27	3.37	3.6	93.75	n/a (VL <1000)
NSC_957	>2	<400	5.5	3.36	3.43	98.01	n/a (VL <1000)
NSC_958	>2	<400	2.28	3.42	3.63	94.41	n/a (VL <1000)
NSC_959	>2	<400	5.3	3.41	3.42	99.62	n/a (VL <1000)
NSC_960	>2	<400	5.25	3.41	3.64	93.91	n/a (VL <1000)
NSC_961	>2	<400	2.11	2.84	3.53	80.47	n/a (VL <1000)
NSC_962	>2	<400	5.85	3.37	3.4	99.14	n/a (VL <1000)
NSC_963	>2	<400	3.78	3.36	3.62	92.68	n/a (VL <1000)
NSC_964	>2	<400	4.43	3.41	3.66	93.09	n/a (VL <1000)
NSC_965	>2	<400	2.5	3.45	3.62	95.1	n/a (VL <1000)
NSC_966	>2	<400	2.98	2.54	3.24	78.44	n/a (VL <1000)
NSC_967	>2	<400	1.12	3.18	3.52	90.4	n/a (VL <1000)
NSC_968	>2	<400	5.26	3.44	3.61	95.07	n/a (VL <1000)
NSC_969	>2	<400	2.38	3.36	3.4	98.99	n/a (VL <1000)
NSC_970	>2	<400	3.15	2.85	3.34	85.41	n/a (VL <1000)
NSC_971	>2	<400	3.76	3.31	3.38	97.96	n/a (VL <1000)
NSC_972	>2	<400	4.16	1.04	3.11	33.41	n/a (VL <1000)
NSC_973	>2	<400	1.54	2.65	3.53	75.09	n/a (VL <1000)
NSC_974	>2	<400	2.97	3.31	3.38	97.96	n/a (VL <1000)
NSC_975	>2	<400	6.19	3.47	3.45	100.64	n/a (VL <1000)
NSC_976	>2	<400	1.24	2.86	3.55	80.45	n/a (VL <1000)
NSC_977	>2	<400	3.9	3.28	3.43	95.43	n/a (VL <1000)
NSC_978	>2	<400	1.54	3.01	3.36	89.62	n/a (VL <1000)
NSC_979	>2	<400	3.01	3.36	3.43	97.87	n/a (VL <1000)
NSC_980	>2	<400	4.68	3.42	3.46	98.57	n/a (VL <1000)
NSC_981	>2	<400	1.22	2.72	3.22	84.67	n/a (VL <1000)
NSC_982	>2	<400	3.68	3.4	3.62	93.92	n/a (VL <1000)
NSC_983	>2	<400	4.31	3.36	3.58	93.87	n/a (VL <1000)
NSC_984	>2	<400	3.41	3.46	3.37	102.72	n/a (VL <1000)
NSC_985	>2	<400	4.89	3.37	3.42	98.52	n/a (VL <1000)
NSC_986	>2	<400	5.51	3.31	3.57	92.79	n/a (VL <1000)
NSC_987	>2	<400	2.81	3.43	3.37	101.58	n/a (VL <1000)
NSC_988	>2	<400	4.78	3.37	3.36	100.41	n/a (VL <1000)
NSC_989	>2	<400	3.59	3.37	3.57	94.4	n/a (VL <1000)
NSC_990	>2	<400	4.22	3.36	3.56	94.51	n/a (VL <1000)
NSC_991	>2	<400	1.16	2.18	3.17	68.95	n/a (VL <1000)
NSC_992	>2	<400	5.75	3.43	3.55	96.41	n/a (VL <1000)
NSC_993	>2	<400	5.44	3.38	3.62	93.33	n/a (VL <1000)
NSC_994	>2	<400	3.78	3.43	3.45	99.56	n/a (VL <1000)
NSC_995	>2	<400	2.81	3.18	3.36	94.62	n/a (VL <1000)
NSC_996	>2	<400	2.73	3.21	3.36	95.6	n/a (VL <1000)
NSC_997	>2	<400	4.15	3.37	3.39	99.47	n/a (VL <1000)
NSC_998	>2	<400	2.61	3.34	3.64	91.73	n/a (VL <1000)
NSC_999	>2	<400	3.6	3.38	3.36	100.49	n/a (VL <1000)
NSC_1000	>2	<400	3.05	3.38	3.62	93.3	n/a (VL <1000)
NSC_1001	>2	<400	1.05	2.71	3.57	75.77	n/a (VL <1000)
NSC_1002	>2	<400	1.58	3.18	3.48	91.34	n/a (VL <1000)
NSC_1003	>2	<400	5.78	3.45	3.4	101.32	n/a (VL <1000)
NSC_1004	>2	<400	3.55	3.24	3.44	94.2	n/a (VL <1000)
NSC_1005	>2	<400	5.11	3.11	3.39	91.94	n/a (VL <1000)
NSC_1006	>2	<400	1.09	2.14	2.98	71.7	n/a (VL <1000)
NSC_1007	>2	<400	6.14	3.46	3.46	99.86	n/a (VL <1000)
NSC_1008	>2	<400	4.36	3.42	3.62	94.44	n/a (VL <1000)
NSC_1009	>2	<400	1.97	3.42	3.33	102.56	n/a (VL <1000)
NSC_1010	>2	<400	0.67	1.76	2.98	58.97	n/a (VL <1000)
NSC_1011	>2	<400	4.89	3.38	3.58	94.29	n/a (VL <1000)
NSC_1012	>2	<400	4.41	3.38	3.43	98.52	n/a (VL <1000)
NSC_1013	>2	<400	3.95	3.44	3.39	101.31	n/a (VL <1000)
NSC_1014	>2	<400	3.71	3.41	3.64	93.64	n/a (VL <1000)
NSC_1015	>2	<400	2.9	3.37	3.36	100.54	n/a (VL <1000)
NSC_1016	>2	<400	4.61	3.39	3.6	94.25	n/a (VL <1000)
NSC_1017	>2	<400	2.16	2.2	3.34	65.75	n/a (VL <1000)
NSC_1018	>2	<400	2.16	3.33	3.37	98.92	n/a (VL <1000)
NSC_1019	>2	<400	1.02	3.31	3.55	93.12	n/a (VL <1000)
NSC_1020	>2	<400	4.07	3.38	3.4	99.43	n/a (VL <1000)
NSC_1021	>2	<400	0.38	0.49	2.93	16.69	n/a (VL <1000)
NSC_1022	>2	<400	4.76	3.43	3.4	101.03	n/a (VL <1000)
NSC_1023	>2	<400	3.03	3.45	3.39	101.68	n/a (VL <1000)
NSC_1024	>2	<400	4.67	3.34	3.34	99.93	n/a (VL <1000)
NSC_1025	>2	<400	3.2	3.48	3.33	104.37	n/a (VL <1000)
NSC_1026	>2	<400	4.25	3.41	3.39	100.62	n/a (VL <1000)
NSC_1027	>2	<400	4.09	3.43	3.43	100.04	n/a (VL <1000)
NSC_1028	>2	<400	4.31	3.45	3.41	101.27	n/a (VL <1000)
NSC_1029	>2	<400	4.61	3.42	3.43	99.74	n/a (VL <1000)
NSC_1030	>2	<400	2.28	3.29	3.37	97.77	n/a (VL <1000)
NSC_1031	>2	<400	1.89	3.4	3.58	95.14	n/a (VL <1000)
NSC_1032	>2	<400	4.85	3.37	3.36	100.36	n/a (VL <1000)
NSC_1033	>2	<400	4.03	3.36	3.36	99.99	n/a (VL <1000)
NSC_1034	>2	<400	3.89	3.37	3.62	93.13	n/a (VL <1000)
NSC_1035	>2	<400	4.46	3.41	3.65	93.47	n/a (VL <1000)
NSC_1036	>2	<400	3.58	3.36	3.56	94.55	n/a (VL <1000)
NSC_1037	>2	<400	4.65	3.38	3.41	99.15	n/a (VL <1000)
NSC_1038	>2	<400	4.66	3.37	3.64	92.64	n/a (VL <1000)
NSC_1039	>2	<400	6.59	3.39	3.38	100.25	n/a (VL <1000)
NSC_1040	>2	<400	2.58	3.25	3.33	97.64	n/a (VL <1000)
NSC_1041	>2	<400	4.89	3.32	3.35	98.97	n/a (VL <1000)
NSC_1042	>2	<400	1.71	2.19	3.25	67.32	n/a (VL <1000)
NSC_1043	>2	<400	4.74	3.42	3.31	103.42	n/a (VL <1000)
NSC_1044	>2	<400	5.31	3.36	3.38	99.5	n/a (VL <1000)
NSC_1045	>2	<400	4.56	3.37	3.6	93.52	n/a (VL <1000)
NSC_1046	>2	<400	3.37	3.37	3.34	100.81	n/a (VL <1000)
NSC_1047	>2	<400	1.56	3.36	3.4	98.7	n/a (VL <1000)
NSC_1048	>2	<400	0.52	2.7	3.31	81.79	n/a (VL <1000)
NSC_1049	>2	<400	2.33	3.4	3.34	101.89	n/a (VL <1000)
NSC_1050	>2	<400	3.07	3.36	3.6	93.35	n/a (VL <1000)
NSC_1051	>2	<400	4.39	3.43	3.35	102.45	n/a (VL <1000)
NSC_1052	>2	<400	5.58	3.41	3.61	94.56	n/a (VL <1000)
NSC_1053	>2	<400	5.58	3.37	3.41	98.99	n/a (VL <1000)
NSC_1054	>2	<400	1.64	3.26	3.28	99.66	n/a (VL <1000)
NSC_1055	>2	<400	5.98	3.47	3.36	103.39	n/a (VL <1000)
NSC_1056	>2	<400	3.53	3.43	3.36	102.15	n/a (VL <1000)
NSC_1057	>2	<400	4.61	3.31	3.36	98.62	n/a (VL <1000)
NSC_1058	>2	<400	4.21	3.42	3.4	100.57	n/a (VL <1000)
NSC_1059	>2	<400	6.06	3.41	3.4	100.28	n/a (VL <1000)
NSC_1060	>2	<400	2.17	3.44	3.42	100.62	n/a (VL <1000)
NSC_1061	>2	<400	2.85	3.4	3.39	100.27	n/a (VL <1000)
NSC_1062	>2	<400	4.99	3.37	3.55	94.86	n/a (VL <1000)
NSC_1063	>2	<400	3.18	3.37	3.4	99.21	n/a (VL <1000)
NSC_1064	>2	<400	5.82	3.36	3.35	100.18	n/a (VL <1000)
NSC_1065	>2	<400	5.34	3.37	3.65	92.27	n/a (VL <1000)
NSC_1066	>2	<400	5.91	3.33	3.37	98.98	n/a (VL <1000)
NSC_1067	>2	<400	0.76	3.35	3.38	99.32	n/a (VL <1000)
NSC_1068	>2	<400	2.42	3.33	3.35	99.33	n/a (VL <1000)
NSC_1069	>2	<400	1.66	3.26	3.56	91.63	n/a (VL <1000)
NSC_1070	>2	<400	1.79	3.4	3.42	99.64	n/a (VL <1000)
NSC_1071	>2	<400	3.17	3.39	3.59	94.37	n/a (VL <1000)
NSC_1072	>2	<400	4.07	3.42	3.31	103.25	n/a (VL <1000)
NSC_1073	>2	<400	4.61	3.38	3.52	95.99	n/a (VL <1000)
NSC_1074	>2	<400	2.08	3.23	3.26	98.91	n/a (VL <1000)
NSC_1075	>2	<400	4.02	3.53	3.41	103.36	n/a (VL <1000)
NSC_1076	>2	<400	2.18	3.37	3.38	99.51	n/a (VL <1000)
NSC_1077	>2	<400	5.05	3.45	3.46	99.84	n/a (VL <1000)
NSC_1078	>2	<400	4.09	3.36	3.36	100.03	n/a (VL <1000)
NSC_1079	>2	<400	1.77	3.48	3.32	104.82	n/a (VL <1000)
NSC_1080	>2	<400	3.81	3.44	3.4	101.34	n/a (VL <1000)
NSC_1081	>2	<400	0.41	3.07	3.37	91.19	n/a (VL <1000)
NSC_1082	>2	<400	3.27	3.51	3.39	103.62	n/a (VL <1000)
NSC_1083	>2	<400	2.78	3.4	3.54	95.9	n/a (VL <1000)
NSC_1084	>2	<400	3.49	3.38	3.38	100.09	n/a (VL <1000)
NSC_1085	>2	<400	3.73	3.3	3.55	92.77	n/a (VL <1000)
NSC_1086	>2	<400	3.14	3.4	3.62	94.01	n/a (VL <1000)
NSC_1087	>2	<400	2.01	3.3	3.43	96.03	n/a (VL <1000)
NSC_1088	>2	<400	3.07	3.34	3.37	99.1	n/a (VL <1000)
NSC_1089	>2	<400	3.74	3.4	3.52	96.6	n/a (VL <1000)
NSC_1090	>2	<400	2.85	3.41	3.39	100.55	n/a (VL <1000)
NSC_1091	>2	<400	4.82	3.52	3.41	103.32	n/a (VL <1000)
NSC_1092	>2	<400	5.26	3.38	3.38	99.87	n/a (VL <1000)
NSC_1093	>2	<400	2.87	3.43	3.4	100.71	n/a (VL <1000)
NSC_1094	>2	<400	2.76	3.36	3.35	100.09	n/a (VL <1000)
NSC_1095	>2	<400	3.13	1.05	3	35.08	n/a (VL <1000)
NSC_1096	>2	<400	4.47	3.37	3.55	94.92	n/a (VL <1000)
NSC_1097	>2	<400	5.4	3.46	3.41	101.41	n/a (VL <1000)
NSC_1098	>2	<400	0.47	0.33	2.86	11.67	n/a (VL <1000)
NSC_1099	>2	<400	1.47	3.36	3.37	99.91	n/a (VL <1000)
NSC_1100	>2	<400	5.5	3.42	3.39	100.81	n/a (VL <1000)
NSC_1101	>2	<400	0.64	2.91	3.35	86.99	n/a (VL <1000)
NSC_1102	>2	<400	4.44	3.44	3.35	102.7	n/a (VL <1000)
NSC_1103	>2	<400	6.33	3.4	3.37	100.83	n/a (VL <1000)
NSC_1104	>2	<400	3.43	3.33	3.38	98.6	n/a (VL <1000)
NSC_1105	>2	<400	4.11	3.36	3.38	99.48	n/a (VL <1000)
NSC_1106	>2	<400	2.65	3.48	3.38	102.96	n/a (VL <1000)
NSC_1107	>2	<400	0.51	2.08	3.19	65.37	n/a (VL <1000)
NSC_1108	>2	<400	3.32	3.39	3.64	93.12	n/a (VL <1000)
NSC_1109	>2	<400	2.28	3.39	3.42	99.09	n/a (VL <1000)
NSC_1110	>2	<400	3.69	3.33	3.35	99.48	n/a (VL <1000)
NSC_1111	>2	<400	4.01	3.48	3.39	102.64	n/a (VL <1000)
NSC_1112	>2	<400	5.37	3.34	3.41	98.04	n/a (VL <1000)
NSC_1113	>2	<400	2.7	3.21	3.32	96.74	n/a (VL <1000)
NSC_1114	>2	<400	6.34	3.38	3.38	100.12	n/a (VL <1000)
NSC_1115	>2	<400	4.64	3.28	3.34	98.27	n/a (VL <1000)
NSC_1116	>2	<400	5.03	3.45	3.59	95.94	n/a (VL <1000)
NSC_1117	>2	<400	4.25	3.4	3.58	95.02	n/a (VL <1000)
NSC_1118	>2	<400	4.71	3.31	3.32	99.68	n/a (VL <1000)
NSC_1119	>2	<400	5.33	3.36	3.39	99.29	n/a (VL <1000)
NSC_1120	>2	<400	4.84	3.41	3.37	101.39	n/a (VL <1000)
NSC_1121	>2	<400	4.01	3.37	3.39	99.46	n/a (VL <1000)
NSC_1122	>2	<400	3.84	3.36	3.39	99.28	n/a (VL <1000)
NSC_1123	>2	<400	5.13	3.36	3.37	99.74	n/a (VL <1000)
NSC_1124	>2	<400	5.69	3.36	3.36	99.82	n/a (VL <1000)
NSC_1125	>2	<400	4.44	3.39	3.6	94.23	n/a (VL <1000)
NSC_1126	>2	<400	3.13	3.06	3.51	87.23	n/a (VL <1000)
NSC_1127	>2	<400	3.6	3.29	3.38	97.35	n/a (VL <1000)
NSC_1128	>2	<400	1.5	3.23	3.52	91.65	n/a (VL <1000)
NSC_1129	>2	<400	1.87	3.03	3.33	90.91	n/a (VL <1000)
NSC_1130	>2	<400	5.7	3.4	3.37	101.06	n/a (VL <1000)
NSC_1131	>2	<400	0.81	2.77	3.26	85.09	n/a (VL <1000)
NSC_1132	>2	<400	2.63	3.36	3.37	99.66	n/a (VL <1000)
NSC_1133	>2	<400	2.41	3.45	3.33	103.55	n/a (VL <1000)
NSC_1134	>2	<400	0.16	1.29	1.92	67.05	n/a (VL <1000)
NSC_1135	>2	<400	5.48	3.39	3.36	100.84	n/a (VL <1000)
NSC_1136	>2	<400	4.59	3.4	3.65	93.28	n/a (VL <1000)
NSC_1137	>2	<400	3.08	2.78	3.33	83.55	n/a (VL <1000)
NSC_1138	>2	<400	0.2	2.42	2.74	88.34	n/a (VL <1000)
NSC_1139	>2	<400	3.66	3.34	3.35	99.81	n/a (VL <1000)
NSC_1140	>2	<400	5.56	3.41	3.39	100.69	n/a (VL <1000)
NSC_1141	>2	<400	2.04	3.24	3.32	97.86	n/a (VL <1000)
NSC_1142	>2	<400	0.78	3.41	3.35	101.77	n/a (VL <1000)
NSC_1143	>2	<400	5.48	3.4	3.37	100.86	n/a (VL <1000)
NSC_1144	>2	<400	4.78	3.4	3.3	102.85	n/a (VL <1000)
NSC_1145	>2	<400	3.54	3.37	3.31	101.56	n/a (VL <1000)
NSC_1146	>2	<400	0.44	1.16	2.58	44.86	n/a (VL <1000)
NSC_1147	>2	<400	5.69	3.37	3.39	99.3	n/a (VL <1000)
NSC_1148	>2	<400	4.8	3.34	3.36	99.6	n/a (VL <1000)
NSC_1149	>2	<400	4.03	3.37	3.38	99.62	n/a (VL <1000)
NSC_1150	>2	<400	5.26	3.46	3.35	103.23	n/a (VL <1000)
NSC_1151	>2	<400	3.81	3.26	3.36	97.18	n/a (VL <1000)
NSC_1152	>2	<400	5.3	3.35	3.38	99.01	n/a (VL <1000)
NSC_1153	>2	<400	0.31	0.16	0.16	96.26	n/a (VL <1000)
NSC_1154	>2	<400	6.15	3.33	3.38	98.61	n/a (VL <1000)
NSC_1155	>2	<400	2.06	3.37	3.31	101.77	n/a (VL <1000)
NSC_1156	>2	<400	2.07	3.34	3.51	95.36	n/a (VL <1000)
NSC_1157	>2	<400	5.94	3.32	3.35	99.33	n/a (VL <1000)
NSC_1158	>2	<400	5.04	3.41	3.4	100.31	n/a (VL <1000)
NSC_1159	>2	<400	1.32	3.39	3.38	100.05	n/a (VL <1000)
NSC_1160	>2	<400	4.19	3.45	3.59	96.15	n/a (VL <1000)
NSC_1161	>2	<400	2.56	3.36	3.38	99.53	n/a (VL <1000)
NSC_1162	>2	<400	3.31	3.35	3.38	99.08	n/a (VL <1000)
NSC_1163	>2	<400	2.55	3.17	3.33	95.46	n/a (VL <1000)
NSC_1164	>2	<400	5.3	3.4	3.43	99.32	n/a (VL <1000)
NSC_1165	>2	<400	3.35	3.33	3.59	92.66	n/a (VL <1000)
NSC_1166	>2	<400	4.19	3.43	3.41	100.63	n/a (VL <1000)
NSC_1167	>2	<400	5.19	3.39	3.61	93.98	n/a (VL <1000)
NSC_1168	>2	<400	1.65	3.45	3.39	101.73	n/a (VL <1000)
NSC_1169	>2	<400	1.32	3.39	3.39	100.1	n/a (VL <1000)
NSC_1170	>2	<400	4.21	3.4	3.65	93.13	n/a (VL <1000)
NSC_1171	>2	<400	5.35	3.37	3.41	99.06	n/a (VL <1000)
NSC_1172	>2	<400	1.25	3.13	3.31	94.63	n/a (VL <1000)
NSC_1173	>2	<400	5.25	3.34	3.4	98.47	n/a (VL <1000)
NSC_1174	>2	<400	3.03	3.41	3.6	94.61	n/a (VL <1000)
NSC_1175	>2	<400	4.21	3.05	3.36	90.66	n/a (VL <1000)
NSC_1176	>2	<400	5	3.44	3.35	102.56	n/a (VL <1000)
NSC_1177	>2	<400	2.68	3.41	3.6	94.77	n/a (VL <1000)
NSC_1178	>2	<400	3.58	3.45	3.36	102.61	n/a (VL <1000)
NSC_1179	>2	<400	4.2	3.37	3.37	99.91	n/a (VL <1000)
NSC_1180	>2	<400	5.58	3.44	3.37	102.25	n/a (VL <1000)
NSC_1181	>2	<400	4.57	3.38	3.33	101.41	n/a (VL <1000)
NSC_1182	>2	<400	1.23	3.31	3.36	98.49	n/a (VL <1000)
NSC_1183	>2	<400	1.53	3.14	3.37	93.11	n/a (VL <1000)
NSC_1184	>2	<400	3.85	3.41	3.39	100.68	n/a (VL <1000)
NSC_1185	>2	<400	4.24	3.36	3.64	92.21	n/a (VL <1000)
NSC_1186	>2	<400	6.16	3.41	3.38	100.7	n/a (VL <1000)
NSC_1187	>2	<400	4.05	3.15	3.24	97.18	n/a (VL <1000)
NSC_1188	>2	<400	1.8	3.31	3.14	105.44	n/a (VL <1000)
NSC_1189	>2	<400	3.52	3.42	3.53	96.74	n/a (VL <1000)
NSC_1190	>2	<400	2.13	2.48	2.97	83.37	n/a (VL <1000)
NSC_1191	>2	<400	1.37	3.33	3.26	102.35	n/a (VL <1000)
NSC_1192	>2	<400	4.35	3.44	3.41	100.97	n/a (VL <1000)
NSC_1193	>2	<400	2.69	3.38	3.48	96.87	n/a (VL <1000)
NSC_1194	>2	<400	4.32	3.45	3.35	103.15	n/a (VL <1000)
NSC_1195	>2	<400	5.82	3.46	3.35	103.33	n/a (VL <1000)
NSC_1196	>2	<400	1.4	3.34	3.37	99.05	n/a (VL <1000)
NSC_1197	>2	<400	6.03	3.35	3.37	99.44	n/a (VL <1000)
NSC_1198	>2	<400	2.47	3.25	3.33	97.7	n/a (VL <1000)
NSC_1199	>2	<400	5.47	3.38	3.35	100.74	n/a (VL <1000)
NSC_1200	>2	<400	4.08	3.37	3.37	99.79	n/a (VL <1000)
NSC_1201	>2	<400	5.07	3.46	3.33	103.9	n/a (VL <1000)
NSC_1202	>2	<400	1.49	1.67	3.35	49.92	n/a (VL <1000)
NSC_1203	>2	<400	0.56	3.32	3.34	99.2	n/a (VL <1000)
NSC_1204	>2	<400	0.59	3.05	3.31	91.98	n/a (VL <1000)
NSC_1205	>2	<400	1.31	2.77	3.29	84.16	n/a (VL <1000)
NSC_1206	>2	<400	0.23	1.85	2.22	83.38	n/a (VL <1000)
NSC_1207	>2	<400	1.82	3.5	3.39	103.11	n/a (VL <1000)
NSC_1208	>2	<400	3.62	3.33	3.34	99.5	n/a (VL <1000)
NSC_1209	>2	<400	2.38	3.22	3.55	90.59	n/a (VL <1000)
NSC_1210	>2	<400	4.43	3.4	3.58	94.85	n/a (VL <1000)
NSC_1211	>2	<400	1.63	3.13	3.59	87.38	n/a (VL <1000)
NSC_1212	>2	<400	3.34	3.42	3.43	99.53	n/a (VL <1000)
NSC_1213	>2	<400	5.15	3.18	3.34	95.23	n/a (VL <1000)
NSC_1214	>2	<400	2.94	3.31	3.32	99.73	n/a (VL <1000)
NSC_1215	>2	<400	4.54	3.45	3.38	102.24	n/a (VL <1000)
NSC_1216	>2	<400	3.7	3.34	3.57	93.43	n/a (VL <1000)
NSC_1217	>2	<400	2.67	3.38	3.38	99.79	n/a (VL <1000)
NSC_1218	>2	<400	4.95	3.36	3.59	93.58	n/a (VL <1000)
NSC_1219	>2	<400	3.19	3.35	3.39	98.72	n/a (VL <1000)
NSC_1220	>2	<400	5.45	3.4	3.33	102.09	n/a (VL <1000)
NSC_1221	>2	<400	2.56	3.43	3.38	101.59	n/a (VL <1000)
NSC_1222	>2	<400	4.7	3.36	3.36	99.81	n/a (VL <1000)
NSC_1223	>2	<400	1.58	3.35	3.38	98.94	n/a (VL <1000)
NSC_1224	>2	<400	4.03	3.41	3.4	100.12	n/a (VL <1000)
NSC_1225	>2	<400	0.68	0.37	1.62	22.88	n/a (VL <1000)
NSC_1226	>2	<400	3.35	3.37	3.36	100.24	n/a (VL <1000)
NSC_1227	>2	<400	3.68	3.37	3.37	99.77	n/a (VL <1000)
NSC_1228	>2	<400	3.46	3.35	3.33	100.7	n/a (VL <1000)
NSC_1229	>2	<400	5.11	3.34	3.35	99.87	n/a (VL <1000)
NSC_1230	>2	<400	3.51	3.48	3.39	102.75	n/a (VL <1000)
NSC_1231	>2	<400	3.79	3.36	3.54	95.08	n/a (VL <1000)
NSC_1232	>2	<400	1.66	2.8	3.17	88.36	n/a (VL <1000)
NSC_1233	>2	<400	1.83	3.37	3.64	92.65	n/a (VL <1000)
NSC_1234	>2	<400	3.36	0.16	3.35	4.71	n/a (VL <1000)
NSC_1235	>2	<400	2.43	3.38	3.39	99.86	n/a (VL <1000)
NSC_1236	>2	<400	3.65	3.4	3.59	94.81	n/a (VL <1000)
NSC_1237	>2	<400	4.59	3.33	3.35	99.41	n/a (VL <1000)
NSC_1238	>2	<400	5.65	3.38	3.36	100.33	n/a (VL <1000)
NSC_1239	>2	<400	4.55	3.35	3.59	93.46	n/a (VL <1000)
NSC_1240	>2	<400	1.62	3.29	3.3	99.58	n/a (VL <1000)
NSC_1241	>2	<400	3.48	3.43	3.36	102.03	n/a (VL <1000)
NSC_1242	>2	<400	2.67	3.44	3.37	101.93	n/a (VL <1000)
NSC_1243	>2	<400	2.76	3.37	3.37	99.86	n/a (VL <1000)
NSC_1244	>2	<400	5.31	3.45	3.42	100.73	n/a (VL <1000)
NSC_1245	>2	<400	5.6	3.33	3.36	99.23	n/a (VL <1000)
NSC_1246	>2	<400	1.1	3.25	3.31	97.94	n/a (VL <1000)
NSC_1247	>2	<400	1.7	3.34	3.37	99	n/a (VL <1000)
NSC_1248	>2	<400	4.74	3.45	3.32	103.92	n/a (VL <1000)
NSC_1249	>2	<400	4.72	3.36	3.35	100.36	n/a (VL <1000)
NSC_1250	>2	<400	3.28	3.36	3.37	99.6	n/a (VL <1000)
NSC_1251	>2	<400	4.06	3.39	3.39	99.85	n/a (VL <1000)
NSC_1252	>2	<400	3.93	3.42	3.4	100.64	n/a (VL <1000)
NSC_1253	>2	<400	0.86	3.39	3.57	94.96	n/a (VL <1000)
NSC_1254	>2	<400	4.02	3.39	3.38	100.22	n/a (VL <1000)
NSC_1255	>2	<400	2.99	3.38	3.51	96.19	n/a (VL <1000)
NSC_1256	>2	<400	1.13	2.3	2.71	85.09	n/a (VL <1000)
NSC_1257	>2	<400	4.32	3.35	3.4	98.56	n/a (VL <1000)
NSC_1258	>2	<400	3.72	3.42	3.4	100.59	n/a (VL <1000)
NSC_1259	>2	<400	3.98	3.43	3.33	103.19	n/a (VL <1000)
NSC_1260	>2	<400	0.3	0.81	2.16	37.29	n/a (VL <1000)
NSC_1261	>2	<400	5.75	3.39	3.57	94.93	n/a (VL <1000)
NSC_1262	>2	<400	4.84	3.36	3.39	99.05	n/a (VL <1000)
NSC_1263	>2	<400	6.15	3.41	3.63	94.11	n/a (VL <1000)
NSC_1264	>2	<400	4.84	3.4	3.35	101.6	n/a (VL <1000)
NSC_1265	>2	<400	6.34	3.39	3.42	99.17	n/a (VL <1000)
NSC_1266	>2	<400	2.42	3.27	3.33	98.21	n/a (VL <1000)
NSC_1267	>2	<400	3.71	3.4	3.53	96.09	n/a (VL <1000)
NSC_1268	>2	<400	1.51	2.68	3.33	80.45	n/a (VL <1000)
NSC_1269	>2	<400	3.19	3.43	3.65	94	n/a (VL <1000)
NSC_1270	>2	<400	2.98	3.35	3.36	99.57	n/a (VL <1000)
NSC_1271	>2	<400	3.55	3.38	3.54	95.27	n/a (VL <1000)
NSC_1272	>2	<400	4.37	3.42	3.35	102.11	n/a (VL <1000)
NSC_1273	>2	<400	4.13	3.35	3.36	99.87	n/a (VL <1000)
NSC_1274	>2	<400	4.52	3.43	3.34	102.67	n/a (VL <1000)
NSC_1275	>2	<400	0.18	0.39	1.25	31.39	n/a (VL <1000)
NSC_1276	>2	<400	5.01	3.35	3.37	99.27	n/a (VL <1000)
NSC_1277	>2	<400	4.52	3.35	3.36	99.68	n/a (VL <1000)
NSC_1278	>2	<400	3.52	3.32	3.33	99.77	n/a (VL <1000)
NSC_1279	>2	<400	5.96	3.41	3.61	94.48	n/a (VL <1000)
NSC_1280	>2	<400	4.51	3.39	3.58	94.85	n/a (VL <1000)
NSC_1281	>2	<400	4.74	3.34	3.37	99.03	n/a (VL <1000)
NSC_1282	>2	<400	1.54	1.09	3.13	34.76	n/a (VL <1000)
NSC_1283	>2	<400	5.82	3.42	3.4	100.61	n/a (VL <1000)
NSC_1284	>2	<400	4.26	3.42	3.36	101.75	n/a (VL <1000)
NSC_1285	>2	<400	2.25	3.38	3.57	94.93	n/a (VL <1000)
NSC_1286	>2	<400	3.88	3.42	3.36	101.74	n/a (VL <1000)
NSC_1287	>2	<400	3.57	3.34	3.37	99.15	n/a (VL <1000)
NSC_1288	>2	<400	2.72	3.39	3.59	94.43	n/a (VL <1000)
NSC_1289	>2	<400	4.73	3.36	3.37	99.83	n/a (VL <1000)
NSC_1290	>2	<400	1.55	3.35	3.33	100.7	n/a (VL <1000)
NSC_1291	>2	<400	2.45	3.41	3.44	99.19	n/a (VL <1000)
NSC_1292	>2	<400	6.64	3.44	3.37	102.03	n/a (VL <1000)
NSC_1293	>2	<400	6.49	3.46	3.36	102.97	n/a (VL <1000)
NSC_1294	>2	<400	4.88	3.36	3.37	99.61	n/a (VL <1000)
NSC_1295	>2	<400	7.37	3.43	3.42	100.24	n/a (VL <1000)
NSC_1296	>2	<400	5.84	3.38	3.41	99.25	n/a (VL <1000)
NSC_1297	>2	<400	5.02	3.44	3.34	102.95	n/a (VL <1000)
NSC_1298	>2	<400	1.69	3.25	3.34	97.24	n/a (VL <1000)
NSC_1299	>2	<400	5.06	3.44	3.35	102.84	n/a (VL <1000)
NSC_1300	>2	<400	3.51	3.35	3.37	99.52	n/a (VL <1000)
NSC_1301	>2	<400	4.05	3.25	3.36	96.74	n/a (VL <1000)
NSC_1302	>2	<400	0.18	0.23	0.57	40.76	n/a (VL <1000)
NSC_1303	>2	<400	2.66	3.4	3.38	100.55	n/a (VL <1000)
NSC_1304	>2	<400	3.15	3.36	3.39	99.11	n/a (VL <1000)
NSC_1305	>2	<400	1.65	3.34	3.37	99.11	n/a (VL <1000)
NSC_1306	>2	<400	2.79	3.46	3.34	103.51	n/a (VL <1000)
NSC_1307	>2	<400	1.12	3.32	3.34	99.23	n/a (VL <1000)
NSC_1308	>2	<400	0.79	3.29	3.55	92.74	n/a (VL <1000)
NSC_1309	>2	<400	1.92	3.44	3.3	104.34	n/a (VL <1000)
NSC_1310	>2	<400	0.9	3.34	3.34	99.88	n/a (VL <1000)
NSC_1311	>2	<400	3.3	3.44	3.4	101.06	n/a (VL <1000)
NSC_1312	>2	<400	3.7	3.36	3.34	100.65	n/a (VL <1000)
NSC_1313	>2	<400	5.56	3.38	3.56	94.99	n/a (VL <1000)
NSC_1314	>2	<400	3.09	3.29	3.35	98.07	n/a (VL <1000)
NSC_1315	>2	<400	2.87	3.37	3.56	94.79	n/a (VL <1000)
NSC_1316	>2	<400	2.69	3.27	3.35	97.46	n/a (VL <1000)
NSC_1317	>2	<400	2.61	3.34	3.32	100.45	n/a (VL <1000)
NSC_1318	>2	<400	1.81	3.11	3.62	85.93	n/a (VL <1000)
NSC_1319	>2	<400	5.16	3.41	3.39	100.5	n/a (VL <1000)
NSC_1320	>2	<400	0.14	0.38	1.1	34.31	n/a (VL <1000)
NSC_1321	>2	<400	2.85	3.36	3.37	99.64	n/a (VL <1000)
NSC_1322	>2	<400	2.89	3.4	3.58	95.19	n/a (VL <1000)
NSC_1323	>2	<400	4.93	3.43	3.35	102.44	n/a (VL <1000)
NSC_1324	>2	<400	4.12	3.42	3.34	102.21	n/a (VL <1000)
NSC_1325	>2	<400	1.69	2.24	3.35	66.72	n/a (VL <1000)
NSC_1326	>2	<400	3.96	3.48	3.37	103.35	n/a (VL <1000)
NSC_1327	>2	<400	1.85	3.45	3.38	102.13	n/a (VL <1000)
NSC_1328	>2	<400	0.92	3.23	3.35	96.55	n/a (VL <1000)
NSC_1329	>2	<400	2.68	3.36	3.38	99.41	n/a (VL <1000)
NSC_1330	>2	<400	4.22	3.33	3.37	99	n/a (VL <1000)
NSC_1331	>2	<400	3.73	3.31	3.58	92.56	n/a (VL <1000)
NSC_1332	>2	<400	3.13	3.38	3.37	100.49	n/a (VL <1000)
NSC_1333	>2	<400	4.87	3.37	3.52	96.01	n/a (VL <1000)
NSC_1334	>2	<400	3.26	3.35	3.38	99.25	n/a (VL <1000)
NSC_1335	>2	<400	5.39	3.44	3.36	102.46	n/a (VL <1000)
NSC_1336	>2	<400	0.63	3.14	3.49	89.88	n/a (VL <1000)
NSC_1337	>2	<400	1.53	3.35	3.35	99.99	n/a (VL <1000)
NSC_1338	>2	<400	3.05	3.22	3.33	96.91	n/a (VL <1000)
NSC_1339	>2	<400	4.09	3.38	3.4	99.49	n/a (VL <1000)
NSC_1340	>2	<400	1.7	3.34	3.33	100.24	n/a (VL <1000)
NSC_1341	>2	<400	2.19	3.31	3.3	100.52	n/a (VL <1000)
NSC_1342	>2	<400	4.17	3.33	3.35	99.56	n/a (VL <1000)
NSC_1343	>2	<400	0.47	3.39	3.29	103.19	n/a (VL <1000)
NSC_1344	>2	<400	0.1	0.49	1.83	26.79	n/a (VL <1000)
NSC_1345	>2	<400	1.31	3.36	3.38	99.39	n/a (VL <1000)
NSC_1346	>2	<400	2.79	3.39	3.38	100.42	n/a (VL <1000)
NSC_1347	>2	<400	5.23	3.39	3.39	100.07	n/a (VL <1000)
NSC_1348	>2	<400	4.96	3.41	3.4	100.04	n/a (VL <1000)
NSC_1349	>2	<400	5.25	3.4	3.54	95.98	n/a (VL <1000)
NSC_1350	>2	<400	1.31	3.42	3.4	100.79	n/a (VL <1000)
NSC_1351	>2	<400	5.19	3.38	3.56	94.95	n/a (VL <1000)
NSC_1352	>2	<400	3.14	3.4	3.39	100.32	n/a (VL <1000)
NSC_1353	>2	<400	5.2	3.35	3.36	99.7	n/a (VL <1000)
NSC_1354	>2	<400	4.51	3.38	3.37	100.13	n/a (VL <1000)
NSC_1355	>2	<400	0.23	1.76	2.08	84.76	n/a (VL <1000)
NSC_1356	>2	<400	4.76	3.33	3.39	98.02	n/a (VL <1000)
NSC_1357	>2	<400	4.52	1.02	2.98	34.34	n/a (VL <1000)
NSC_1358	>2	<400	4.43	3.39	3.41	99.49	n/a (VL <1000)
NSC_1359	>2	<400	5.77	3.45	3.38	102	n/a (VL <1000)
NSC_1360	>2	<400	2.82	3.44	3.38	101.85	n/a (VL <1000)
NSC_1361	>2	<400	5.19	3.38	3.56	94.94	n/a (VL <1000)
NSC_1362	>2	<400	5.36	3.47	3.37	102.97	n/a (VL <1000)
NSC_1363	>2	<400	5.26	3.32	3.32	99.84	n/a (VL <1000)
NSC_1364	>2	<400	2.84	3.41	3.3	103.44	n/a (VL <1000)
NSC_1365	>2	<400	1.43	3.37	3.31	101.98	n/a (VL <1000)
NSC_1366	>2	<400	5.41	3.37	3.38	99.6	n/a (VL <1000)
NSC_1367	>2	<400	1.7	3.09	3.57	86.56	n/a (VL <1000)
NSC_1368	>2	<400	1.97	3.41	3.32	102.84	n/a (VL <1000)
NSC_1369	>2	<400	4.13	3.35	3.36	99.69	n/a (VL <1000)
NSC_1370	>2	<400	5.42	3.35	3.6	93.22	n/a (VL <1000)
NSC_1371	>2	<400	2.92	3.37	3.63	92.91	n/a (VL <1000)
NSC_1372	>2	<400	4.78	3.37	3.39	99.48	n/a (VL <1000)
NSC_1373	>2	<400	2.1	3.34	3.37	98.95	n/a (VL <1000)
NSC_1374	>2	<400	4.53	3.4	3.38	100.7	n/a (VL <1000)
NSC_1375	>2	<400	5.01	3.43	3.41	100.8	n/a (VL <1000)
NSC_1376	>2	<400	5.29	3.39	3.58	94.53	n/a (VL <1000)
NSC_1377	>2	<400	4.59	3.37	3.57	94.49	n/a (VL <1000)
NSC_1378	>2	<400	4.37	3.33	3.37	98.77	n/a (VL <1000)
NSC_1379	>2	<400	0.98	2.45	3.26	75.19	n/a (VL <1000)
NSC_1380	>2	<400	5.32	3.32	3.33	99.7	n/a (VL <1000)
NSC_1381	>2	<400	3.32	3.43	3.32	103.24	n/a (VL <1000)
NSC_1382	>2	<400	4.91	3.42	3.41	100.35	n/a (VL <1000)
NSC_1383	>2	<400	4.25	3.37	3.38	99.52	n/a (VL <1000)
NSC_1384	>2	<400	5.07	3.35	3.58	93.52	n/a (VL <1000)
NSC_1385	>2	<400	5.46	3.31	3.35	98.81	n/a (VL <1000)
NSC_1386	>2	<400	2.36	3.32	3.36	98.68	n/a (VL <1000)
NSC_1387	>2	<400	3	3.39	3.57	95.04	n/a (VL <1000)
NSC_1388	>2	<400	4.6	3.41	3.66	93.37	n/a (VL <1000)
NSC_1389	>2	<400	6.58	3.36	3.62	92.89	n/a (VL <1000)
NSC_1390	>2	<400	4.12	3.38	3.6	94.08	n/a (VL <1000)
NSC_1391	>2	<400	1.21	3.38	3.4	99.32	n/a (VL <1000)
NSC_1392	>2	<400	4.07	3.38	3.57	94.71	n/a (VL <1000)
NSC_1393	>2	<400	2.4	3.34	3.34	99.93	n/a (VL <1000)
NSC_1394	>2	<400	2.35	3.38	3.42	99.03	n/a (VL <1000)
NSC_1395	>2	<400	0.2	1.18	2.64	44.58	n/a (VL <1000)
NSC_1396	>2	<400	1.97	3.38	3.57	94.58	n/a (VL <1000)
NSC_1397	>2	<400	3.98	3.38	3.37	100.22	n/a (VL <1000)
NSC_1398	>2	<400	2.78	3.26	3.39	96.21	n/a (VL <1000)
NSC_1399	>2	<400	2.08	1.94	3.36	57.63	n/a (VL <1000)
NSC_1400	>2	<400	5.39	3.4	3.57	95.3	n/a (VL <1000)
NSC_1401	>2	<400	2.56	3.42	3.42	99.91	n/a (VL <1000)
NSC_1402	>2	<400	3.11	3.34	3.34	100.05	n/a (VL <1000)
NSC_1403	>2	<400	3.29	3.46	3.35	103.25	n/a (VL <1000)
NSC_1404	>2	<400	5.17	3.41	3.58	95.08	n/a (VL <1000)
NSC_1405	>2	<400	4.7	3.41	3.33	102.59	n/a (VL <1000)
NSC_1406	>2	<400	0.59	2.96	3.28	90.25	n/a (VL <1000)
NSC_1407	>2	<400	2.68	3.33	3.54	94.01	n/a (VL <1000)
NSC_1408	>2	<400	2.03	3.38	3.4	99.21	n/a (VL <1000)
NSC_1409	>2	<400	4.14	3.37	3.39	99.58	n/a (VL <1000)
NSC_1410	>2	<400	4.01	3.37	3.39	99.59	n/a (VL <1000)
NSC_1411	>2	<400	1.5	3.33	3.34	99.9	n/a (VL <1000)
NSC_1412	>2	<400	2.11	1.37	3.22	42.49	n/a (VL <1000)
NSC_1413	>2	<400	1.36	3.36	3.61	93.07	n/a (VL <1000)
NSC_1414	>2	<400	4.66	3.41	3.34	102.06	n/a (VL <1000)
NSC_1415	>2	<400	3.4	3.39	3.34	101.55	n/a (VL <1000)
NSC_1416	>2	<400	2.67	3.36	3.35	100.3	n/a (VL <1000)
NSC_1417	>2	<400	3.97	3.37	3.39	99.28	n/a (VL <1000)
NSC_1418	>2	<400	4.88	3.42	3.39	100.76	n/a (VL <1000)
NSC_1419	>2	<400	1.27	3.35	3.38	99.14	n/a (VL <1000)
NSC_1420	>2	<400	4.27	3.39	3.35	101.2	n/a (VL <1000)
NSC_1421	>2	<400	2.33	3.48	3.35	103.7	n/a (VL <1000)
NSC_1422	>2	<400	4.7	3.32	3.61	92.22	n/a (VL <1000)
NSC_1423	>2	<400	3.33	3.4	3.36	100.94	n/a (VL <1000)
NSC_1424	>2	<400	3.02	3.42	3.34	102.15	n/a (VL <1000)
NSC_1425	>2	<400	4.64	3.39	3.6	94.27	n/a (VL <1000)
NSC_1426	>2	<400	1.99	2.88	3.28	87.69	n/a (VL <1000)
NSC_1427	>2	<400	1.97	3.37	3.41	98.75	n/a (VL <1000)
NSC_1428	>2	<400	2.87	3.4	3.62	93.96	n/a (VL <1000)
NSC_1429	>2	<400	0.56	3.3	3.35	98.64	n/a (VL <1000)
NSC_1430	>2	<400	4.09	3.34	3.56	93.73	n/a (VL <1000)
NSC_1431	>2	<400	3.14	3.35	3.54	94.59	n/a (VL <1000)
NSC_1432	>2	<400	3.63	3.37	3.4	99.02	n/a (VL <1000)
NSC_1433	>2	<400	2.14	3.35	3.37	99.53	n/a (VL <1000)
NSC_1434	>2	<400	3.5	3.37	3.4	99.16	n/a (VL <1000)
NSC_1435	>2	<400	2.46	3.4	3.37	100.68	n/a (VL <1000)
NSC_1436	>2	<400	2.78	3.29	3.32	98.98	n/a (VL <1000)
NSC_1437	>2	<400	5.8	0.92	3.45	26.52	n/a (VL <1000)
NSC_1438	>2	<400	3.66	3.31	3.32	99.61	n/a (VL <1000)
NSC_1439	>2	<400	3.51	3.43	3.37	101.81	n/a (VL <1000)
NSC_1440	>2	<400	4.89	3.4	3.34	101.8	n/a (VL <1000)
NSC_1441	>2	<400	4.08	3.38	3.42	99.03	n/a (VL <1000)
NSC_1442	>2	<400	2.79	2.91	3.32	87.67	n/a (VL <1000)
NSC_1443	>2	<400	3.93	3.41	3.32	102.69	n/a (VL <1000)
NSC_1444	>2	<400	3.4	3.39	3.38	100.38	n/a (VL <1000)
NSC_1445	>2	<400	2.2	3.45	3.34	103.11	n/a (VL <1000)
NSC_1446	>2	<400	1.23	3.07	3.47	88.45	n/a (VL <1000)
NSC_1447	>2	<400	5.09	3.37	3.32	101.58	n/a (VL <1000)
NSC_1448	>2	<400	2.97	3.4	3.38	100.68	n/a (VL <1000)
NSC_1449	>2	<400	0.68	3.15	3.27	96.17	n/a (VL <1000)
NSC_1450	>2	<400	3.31	3.37	3.58	94.06	n/a (VL <1000)
NSC_1451	>2	<400	0.95	3.43	3.35	102.57	n/a (VL <1000)
NSC_1452	>2	<400	4.49	3.44	3.37	101.97	n/a (VL <1000)
NSC_1453	>2	<400	0.63	3.34	3.37	99.16	n/a (VL <1000)
NSC_1454	>2	<400	1.65	2.92	3.52	82.95	n/a (VL <1000)
NSC_1455	>2	<400	5.97	3.42	3.38	101.31	n/a (VL <1000)
NSC_1456	>2	<400	5.59	3.36	3.35	100.35	n/a (VL <1000)
NSC_1457	>2	<400	0.9	3.07	3.29	93.31	n/a (VL <1000)
NSC_1458	>2	<400	5.06	3.42	3.3	103.67	n/a (VL <1000)
NSC_1459	>2	<400	2.12	3.43	3.36	101.88	n/a (VL <1000)
NSC_1460	>2	<400	4.76	3.37	3.37	100.06	n/a (VL <1000)
NSC_1461	>2	<400	1.03	2.63	3.05	86.41	n/a (VL <1000)
NSC_1462	>2	<400	1.79	3.32	3.33	99.45	n/a (VL <1000)
NSC_1463	>2	<400	4.77	3.42	3.4	100.59	n/a (VL <1000)
NSC_1464	>2	<400	1.21	3.35	3.3	101.74	n/a (VL <1000)
NSC_1465	>2	<400	4.38	3.42	3.41	100.22	n/a (VL <1000)
NSC_1466	>2	<400	4.29	3.42	3.64	93.97	n/a (VL <1000)
NSC_1467	>2	<400	2.63	3.18	3.3	96.42	n/a (VL <1000)
NSC_1468	>2	<400	3.54	3.24	3.56	91.04	n/a (VL <1000)
NSC_1469	>2	<400	1.49	3.26	3.32	98.21	n/a (VL <1000)
NSC_1470	>2	<400	0.83	3.36	3.33	101.09	n/a (VL <1000)
NSC_1471	>2	<400	3.97	3.53	3.41	103.65	n/a (VL <1000)
NSC_1472	>2	<400	4.76	3.42	3.36	101.85	n/a (VL <1000)
NSC_1473	>2	<400	1.91	3.35	3.38	99.11	n/a (VL <1000)
NSC_1474	>2	<400	1.08	1.72	3.36	51.12	n/a (VL <1000)
NSC_1475	>2	<400	3.58	3.38	3.57	94.84	n/a (VL <1000)
NSC_1476	>2	<400	0.17	0.14	0.14	97.73	n/a (VL <1000)
NSC_1477	>2	<400	3.85	3.43	3.39	101.3	n/a (VL <1000)
NSC_1478	>2	<400	4.19	3.38	3.62	93.41	n/a (VL <1000)
NSC_1479	>2	<400	2.22	3.33	3.34	99.61	n/a (VL <1000)
NSC_1480	>2	<400	4.15	3.42	3.4	100.53	n/a (VL <1000)
NSC_1481	>2	<400	2.42	3.32	3.36	98.98	n/a (VL <1000)
NSC_1482	>2	<400	3.66	3.34	3.35	99.77	n/a (VL <1000)
NSC_1483	>2	<400	0.44	2.69	3.03	88.69	n/a (VL <1000)
NSC_1484	>2	<400	4.77	3.36	3.37	99.6	n/a (VL <1000)
NSC_1485	>2	<400	3.06	3.33	3.38	98.53	n/a (VL <1000)
NSC_1486	>2	<400	3.88	3.39	3.61	93.82	n/a (VL <1000)
NSC_1487	>2	<400	4.15	3.32	3.37	98.32	n/a (VL <1000)
NSC_1488	>2	<400	3.44	3.4	3.57	95.38	n/a (VL <1000)
NSC_1489	>2	<400	0.72	3.05	3.25	93.86	n/a (VL <1000)
NSC_1490	>2	<400	2.33	3.4	3.33	101.89	n/a (VL <1000)
NSC_1491	>2	<400	3.73	3.37	3.55	94.85	n/a (VL <1000)
NSC_1492	>2	<400	3.64	2.63	3.32	79.28	n/a (VL <1000)
NSC_1493	>2	<400	2.99	3.36	3.32	101.28	n/a (VL <1000)
NSC_1494	>2	<400	1.88	3.39	3.28	103.12	n/a (VL <1000)
NSC_1495	>2	<400	3.06	3.32	3.36	98.92	n/a (VL <1000)
NSC_1496	>2	<400	3.76	3.39	3.56	95.24	n/a (VL <1000)
NSC_1497	>2	<400	2.61	3.35	3.37	99.44	n/a (VL <1000)
NSC_1498	>2	<400	4.34	3.35	3.37	99.27	n/a (VL <1000)
NSC_1499	>2	<400	5.52	3.43	3.34	102.61	n/a (VL <1000)
NSC_1500	>2	<400	6.43	3.33	3.36	98.88	n/a (VL <1000)
NSC_1501	>2	<400	4.41	3.33	3.35	99.4	n/a (VL <1000)
NSC_1502	>2	<400	3.61	3.39	3.57	94.83	n/a (VL <1000)
NSC_1503	>2	<400	2.15	3.36	3.28	102.46	n/a (VL <1000)
NSC_1504	>2	<400	5.21	3.4	3.4	100.11	n/a (VL <1000)
NSC_1505	>2	<400	1.33	3.12	3.37	92.57	n/a (VL <1000)
NSC_1506	>2	<400	4.72	3.39	3.35	101.25	n/a (VL <1000)
NSC_1507	>2	<400	4.56	3.37	3.57	94.37	n/a (VL <1000)
NSC_1508	>2	<400	0.67	2.76	3.32	82.92	n/a (VL <1000)
NSC_1509	>2	<400	4.98	3.38	3.63	93.03	n/a (VL <1000)
NSC_1510	>2	<400	3.56	3.4	3.4	100.01	n/a (VL <1000)
NSC_1511	>2	<400	5.19	3.3	3.36	98.07	n/a (VL <1000)
NSC_1512	>2	<400	7.24	3.34	3.37	99.01	n/a (VL <1000)
NSC_1513	>2	<400	6.43	3.41	3.37	101.16	n/a (VL <1000)
NSC_1514	>2	<400	3.9	3.4	3.38	100.44	n/a (VL <1000)
NSC_1515	>2	<400	4.07	3.37	3.56	94.69	n/a (VL <1000)
NSC_1516	>2	<400	4.95	3.43	3.65	93.88	n/a (VL <1000)
NSC_1517	>2	<400	0.36	1.32	2.15	61.47	n/a (VL <1000)
NSC_1518	>2	<400	3.91	3.34	3.35	99.63	n/a (VL <1000)
NSC_1519	>2	<400	2.6	3.36	3.59	93.76	n/a (VL <1000)
NSC_1520	>2	<400	5.21	3.4	3.33	102.28	n/a (VL <1000)
NSC_1521	>2	<400	2.91	3.42	3.4	100.6	n/a (VL <1000)
NSC_1522	>2	<400	4.43	3.3	3.32	99.48	n/a (VL <1000)
NSC_1523	>2	<400	0.22	2.24	2.64	84.9	n/a (VL <1000)
NSC_1524	>2	<400	1.42	3.35	3.36	99.82	n/a (VL <1000)
NSC_1525	>2	<400	2.81	3.42	3.41	100.14	n/a (VL <1000)
NSC_1526	>2	<400	0.23	0.54	0.92	58.11	n/a (VL <1000)
NSC_1527	>2	<400	3.66	3.34	3.34	99.78	n/a (VL <1000)
NSC_1528	>2	<400	0.93	3.36	3.56	94.47	n/a (VL <1000)
NSC_1529	>2	<400	3.65	3.31	3.33	99.38	n/a (VL <1000)
NSC_1530	>2	<400	1.32	3.41	3.37	101.17	n/a (VL <1000)
NSC_1531	>2	<400	0.8	2.98	3.24	91.87	n/a (VL <1000)
NSC_1532	>2	<400	4.62	3.44	3.36	102.42	n/a (VL <1000)
NSC_1533	>2	<400	4.52	3.33	3.34	99.79	n/a (VL <1000)
NSC_1534	>2	<400	3.93	3.38	3.39	99.74	n/a (VL <1000)
NSC_1535	>2	<400	3.27	3.4	3.34	101.99	n/a (VL <1000)
NSC_1536	>2	<400	6.39	3.45	3.43	100.57	n/a (VL <1000)
NSC_1537	>2	<400	3.88	3.38	3.41	99	n/a (VL <1000)
NSC_1538	>2	<400	2.31	3.34	3.38	98.85	n/a (VL <1000)
NSC_1539	>2	<400	3.78	3.45	3.35	102.93	n/a (VL <1000)
NSC_1540	>2	<400	3.69	3.36	3.37	99.65	n/a (VL <1000)
NSC_1541	>2	<400	4.55	3.46	3.39	102.08	n/a (VL <1000)
NSC_1542	>2	<400	5.66	3.3	3.33	99.33	n/a (VL <1000)
NSC_1543	>2	<400	4.59	3.41	3.3	103.5	n/a (VL <1000)
NSC_1544	>2	<400	5.91	3.35	3.37	99.55	n/a (VL <1000)
NSC_1545	>2	<400	4.87	3.35	3.36	99.54	n/a (VL <1000)
NSC_1546	>2	<400	4.49	3.41	3.59	94.89	n/a (VL <1000)
NSC_1547	>2	<400	1.82	3.4	3.33	102.07	n/a (VL <1000)
NSC_1548	>2	<400	5.91	3.33	3.35	99.52	n/a (VL <1000)
NSC_1549	>2	<400	5.34	3.39	3.36	100.88	n/a (VL <1000)
NSC_1550	>2	<400	3.95	3.42	3.38	100.97	n/a (VL <1000)
NSC_1551	>2	<400	4.08	3.39	3.39	100.07	n/a (VL <1000)
NSC_1552	>2	<400	3.18	3.42	3.38	101.08	n/a (VL <1000)
NSC_1553	>2	<400	4.07	3.49	3.38	103.31	n/a (VL <1000)
NSC_1554	>2	<400	4.74	3.41	3.61	94.57	n/a (VL <1000)
NSC_1555	>2	<400	0.89	3.44	3.39	101.65	n/a (VL <1000)
NSC_1556	>2	<400	2.71	3.41	3.35	101.81	n/a (VL <1000)
NSC_1557	>2	<400	4.08	3.43	3.38	101.7	n/a (VL <1000)
NSC_1558	>2	<400	3.07	3.37	3.56	94.84	n/a (VL <1000)
NSC_1559	>2	<400	2.72	3.47	3.38	102.71	n/a (VL <1000)
NSC_1560	>2	<400	4.6	3.42	3.41	100.16	n/a (VL <1000)
NSC_1561	>2	<400	2.66	3.41	3.3	103.12	n/a (VL <1000)
NSC_1562	>2	<400	4.54	3.35	3.36	99.73	n/a (VL <1000)
NSC_1563	>2	<400	3.2	3.41	3.63	93.91	n/a (VL <1000)
NSC_1564	>2	<400	1.16	3.12	3.13	99.78	n/a (VL <1000)
NSC_1565	>2	<400	3.83	3.44	3.35	102.53	n/a (VL <1000)
NSC_1566	>2	<400	3.86	3.41	3.41	99.85	n/a (VL <1000)
NSC_1567	>2	<400	1.81	3.34	3.34	99.73	n/a (VL <1000)
NSC_1568	>2	<400	3.33	3.31	3.31	100.18	n/a (VL <1000)
NSC_1569	>2	<400	4.69	3.44	3.38	101.86	n/a (VL <1000)
NSC_1570	>2	<400	4.3	3.36	3.37	99.55	n/a (VL <1000)
NSC_1571	>2	<400	5.32	3.39	3.64	93.19	n/a (VL <1000)
NSC_1572	>2	<400	3.88	3.42	3.64	93.9	n/a (VL <1000)
NSC_1573	>2	<400	2.04	3.27	3.35	97.45	n/a (VL <1000)
NSC_1574	>2	<400	6.76	3.34	3.35	99.7	n/a (VL <1000)
NSC_1575	>2	<400	2.98	3.37	3.37	99.84	n/a (VL <1000)
NSC_1576	>2	<400	4.08	3.4	3.59	94.81	n/a (VL <1000)
NSC_1577	>2	<400	2.67	3.39	3.55	95.49	n/a (VL <1000)
NSC_1578	>2	<400	4.87	3.47	3.38	102.54	n/a (VL <1000)
NSC_1579	>2	<400	5.2	3.42	3.6	94.79	n/a (VL <1000)
NSC_1580	>2	<400	3.19	3.45	3.35	103.01	n/a (VL <1000)
NSC_1581	>2	<400	5.13	3.42	3.64	94.02	n/a (VL <1000)
NSC_1582	>2	<400	1.78	1.57	3.14	50.01	n/a (VL <1000)
NSC_1583	>2	<400	3.66	3.33	3.34	99.85	n/a (VL <1000)
NSC_1584	>2	<400	3.64	3.36	3.41	98.66	n/a (VL <1000)
NSC_1585	>2	<400	2.43	3.39	3.3	102.62	n/a (VL <1000)
NSC_1586	>2	<400	4.27	3.35	3.56	94.14	n/a (VL <1000)
NSC_1587	>2	<400	5.38	3.06	3.37	90.92	n/a (VL <1000)
NSC_1588	>2	<400	3.04	3.35	3.36	99.86	n/a (VL <1000)
NSC_1589	>2	<400	3.51	3.31	3.33	99.35	n/a (VL <1000)
NSC_1590	>2	<400	1.78	3.37	3.38	99.74	n/a (VL <1000)
NSC_1591	>2	<400	6.14	3.38	3.54	95.5	n/a (VL <1000)
NSC_1592	>2	<400	0.48	1.5	2.32	64.48	n/a (VL <1000)
NSC_1593	>2	<400	3.86	3.46	3.39	102.33	n/a (VL <1000)
NSC_1594	>2	<400	4.05	3.38	3.61	93.48	n/a (VL <1000)
NSC_1595	>2	<400	2.49	3.45	3.36	102.63	n/a (VL <1000)
NSC_1596	>2	<400	2.78	3.33	3.55	93.95	n/a (VL <1000)
NSC_1597	>2	<400	4.53	3.43	3.41	100.8	n/a (VL <1000)
NSC_1598	>2	<400	1.72	3.37	3.57	94.37	n/a (VL <1000)
NSC_1599	>2	<400	0.17	0.15	0.17	90.62	n/a (VL <1000)
NSC_1600	>2	<400	6.6	3.3	3.3	99.83	n/a (VL <1000)
NSC_1601	>2	<400	5.66	3.44	3.37	102.25	n/a (VL <1000)
NSC_1602	>2	<400	0.99	3.11	3.3	94.27	n/a (VL <1000)
NSC_1603	>2	<400	3.72	3.36	3.36	99.93	n/a (VL <1000)
NSC_1604	>2	<400	4.06	3.45	3.37	102.29	n/a (VL <1000)
NSC_1605	>2	<400	2	3.31	3.32	99.74	n/a (VL <1000)
NSC_1606	>2	<400	1.56	3.39	3.59	94.6	n/a (VL <1000)
NSC_1607	>2	<400	2.19	2.45	3.15	77.98	n/a (VL <1000)
NSC_1608	>2	<400	1.71	3.34	3.34	100.1	n/a (VL <1000)
NSC_1609	>2	<400	3.59	3.36	3.6	93.53	n/a (VL <1000)
NSC_1610	>2	<400	0.38	0.61	2.13	28.71	n/a (VL <1000)
NSC_1611	>2	<400	4.42	3.37	3.41	98.82	n/a (VL <1000)
NSC_1612	>2	<400	2.1	3.34	3.35	99.6	n/a (VL <1000)
NSC_1613	>2	<400	2.47	3.32	3.39	97.82	n/a (VL <1000)
NSC_1614	>2	<400	6.74	3.47	3.38	102.89	n/a (VL <1000)
NSC_1615	>2	<400	4.29	3.36	3.37	99.61	n/a (VL <1000)
NSC_1616	>2	<400	4.21	3.33	3.6	92.28	n/a (VL <1000)
NSC_1617	>2	<400	5.01	3.32	3.33	99.64	n/a (VL <1000)
NSC_1618	>2	<400	3.26	1.07	3.19	33.38	n/a (VL <1000)
NSC_1619	>2	<400	6.56	3.48	3.39	102.58	n/a (VL <1000)
NSC_1620	>2	<400	5.31	3.4	3.38	100.33	n/a (VL <1000)
NSC_1621	>2	<400	3.29	3.3	3.32	99.37	n/a (VL <1000)
NSC_1622	>2	<400	6.12	3.41	3.56	95.66	n/a (VL <1000)
NSC_1623	>2	<400	5.16	3.38	3.55	95.09	n/a (VL <1000)
NSC_1624	>2	<400	3.45	3.38	3.57	94.48	n/a (VL <1000)
NSC_1625	>2	<400	2.46	3.4	3.61	94.2	n/a (VL <1000)
NSC_1626	>2	<400	4.62	3.51	3.4	103.05	n/a (VL <1000)
NSC_1627	>2	<400	6.61	3.37	3.34	101.09	n/a (VL <1000)
NSC_1628	>2	<400	3.82	3.41	3.57	95.51	n/a (VL <1000)
NSC_1629	>2	<400	3.09	3.39	3.59	94.39	n/a (VL <1000)
NSC_1630	>2	<400	2.55	3.4	3.38	100.77	n/a (VL <1000)
NSC_1631	>2	<400	4.04	3.14	3.58	87.75	n/a (VL <1000)
NSC_1632	>2	<400	3.24	0.84	3.07	27.43	n/a (VL <1000)
NSC_1633	>2	<400	0.68	3.26	3.38	96.72	n/a (VL <1000)
NSC_1634	>2	<400	2.53	3.28	3.56	92.21	n/a (VL <1000)
NSC_1635	>2	<400	4.05	3.36	3.29	102.18	n/a (VL <1000)
NSC_1636	>2	<400	3.17	3.1	3.49	88.85	n/a (VL <1000)
NSC_1637	>2	<400	2.23	3.38	3.61	93.52	n/a (VL <1000)
NSC_1638	>2	<400	5.22	3.3	3.31	99.96	n/a (VL <1000)
NSC_1639	>2	<400	4.79	3.42	3.4	100.36	n/a (VL <1000)
NSC_1640	>2	<400	1.99	3.25	3.41	95.43	n/a (VL <1000)
NSC_1641	>2	<400	1.01	3.4	3.35	101.42	n/a (VL <1000)
NSC_1642	>2	<400	4.58	3.4	3.4	99.9	n/a (VL <1000)
NSC_1643	>2	<400	4.92	3.41	3.38	101.12	n/a (VL <1000)
NSC_1644	>2	<400	6.19	3.25	3.34	97.22	n/a (VL <1000)
NSC_1645	>2	<400	5.51	3.39	3.33	101.76	n/a (VL <1000)
NSC_1646	>2	<400	5.43	3.36	3.37	99.68	n/a (VL <1000)
NSC_1647	>2	<400	1.41	3.28	3.6	91.19	n/a (VL <1000)
NSC_1648	>2	<400	6.2	3.48	3.4	102.45	n/a (VL <1000)
NSC_1649	>2	<400	4.85	3.44	3.34	102.93	n/a (VL <1000)
NSC_1650	>2	<400	5.29	3.33	3.36	99.15	n/a (VL <1000)
NSC_1651	>2	<400	3.03	3.17	3.31	95.58	n/a (VL <1000)
NSC_1652	>2	<400	2.61	3.44	3.42	100.52	n/a (VL <1000)
NSC_1653	>2	<400	4.46	3.37	3.58	94	n/a (VL <1000)
NSC_1654	>2	<400	1.43	3.38	3.36	100.72	n/a (VL <1000)
NSC_1655	>2	<400	4.92	3.4	3.33	102.11	n/a (VL <1000)
NSC_1656	>2	<400	4.81	3.4	3.29	103.27	n/a (VL <1000)
NSC_1657	>2	<400	1.37	3.36	3.54	94.99	n/a (VL <1000)
NSC_1658	>2	<400	2.01	3.38	3.37	100.53	n/a (VL <1000)
NSC_1659	>2	<400	3.07	3.44	3.34	103.18	n/a (VL <1000)
NSC_1660	>2	<400	2.8	3.35	3.54	94.6	n/a (VL <1000)
NSC_1661	>2	<400	0.54	0.4	1.11	36.48	n/a (VL <1000)
NSC_1662	>2	<400	2.2	3.34	3.35	99.52	n/a (VL <1000)
NSC_1663	>2	<400	0.68	0.36	1.26	28.75	n/a (VL <1000)
NSC_1664	>2	<400	3.95	3.39	3.38	100.23	n/a (VL <1000)
NSC_1665	>2	<400	2.91	3.46	3.37	102.65	n/a (VL <1000)
NSC_1666	>2	<400	4.92	3.41	3.6	94.69	n/a (VL <1000)
NSC_1667	>2	<400	4.59	3.43	3.33	103.06	n/a (VL <1000)
NSC_1668	>2	<400	2.97	3.12	3.37	92.57	n/a (VL <1000)
NSC_1669	>2	<400	3.2	3.37	3.35	100.33	n/a (VL <1000)
NSC_1670	>2	<400	4.59	3.41	3.32	102.6	n/a (VL <1000)
NSC_1671	>2	<400	3.12	3.37	3.3	102.24	n/a (VL <1000)
NSC_1672	>2	<400	1.94	3.34	3.34	99.9	n/a (VL <1000)
NSC_1673	>2	<400	2.13	3.36	3.36	99.95	n/a (VL <1000)
NSC_1674	>2	<400	5.46	3.37	3.59	93.89	n/a (VL <1000)
NSC_1675	>2	<400	3.92	3.35	3.38	99.24	n/a (VL <1000)
NSC_1676	>2	<400	3.36	3.44	3.43	100.36	n/a (VL <1000)
NSC_1677	>2	<400	3.6	3.39	3.39	99.98	n/a (VL <1000)
NSC_1678	>2	<400	3.56	3.46	3.36	102.75	n/a (VL <1000)
NSC_1679	>2	<400	3.13	3.37	3.37	99.94	n/a (VL <1000)
NSC_1680	>2	<400	3.25	3.36	3.32	101.12	n/a (VL <1000)
NSC_1681	>2	<400	3.2	3.42	3.56	96.16	n/a (VL <1000)
NSC_1682	>2	<400	3.84	3.33	3.39	98.33	n/a (VL <1000)
NSC_1683	>2	<400	2.76	3.37	3.37	99.9	n/a (VL <1000)
NSC_1684	>2	<400	3.99	3.41	3.41	99.97	n/a (VL <1000)
NSC_1685	>2	<400	0.9	3.4	3.32	102.34	n/a (VL <1000)
NSC_1686	>2	<400	7.04	3.37	3.6	93.44	n/a (VL <1000)
NSC_1687	>2	<400	2.5	3.38	3.57	94.74	n/a (VL <1000)
NSC_1688	>2	<400	3.55	3.38	3.33	101.67	n/a (VL <1000)
NSC_1689	>2	<400	2.91	3.31	3.39	97.7	n/a (VL <1000)
NSC_1690	>2	<400	4.43	3.44	3.37	102.17	n/a (VL <1000)
NSC_1691	>2	<400	4.95	3.42	3.59	95.43	n/a (VL <1000)
NSC_1692	>2	<400	2.46	3.17	3.26	97.45	n/a (VL <1000)
NSC_1693	>2	<400	6.89	3.41	3.39	100.6	n/a (VL <1000)
NSC_1694	>2	<400	2.08	3.36	3.37	99.56	n/a (VL <1000)
NSC_1695	>2	<400	6.07	3.34	3.41	97.9	n/a (VL <1000)
NSC_1696	>2	<400	2.51	2.54	3.18	79.86	n/a (VL <1000)
NSC_1697	>2	<400	0.17	0.19	0.19	103.42	n/a (VL <1000)
NSC_1698	>2	<400	4.52	3.39	3.6	94.1	n/a (VL <1000)
NSC_1699	>2	<400	2.29	3.36	3.39	99.26	n/a (VL <1000)
NSC_1700	>2	<400	1.47	3.35	3.37	99.56	n/a (VL <1000)
NSC_1701	>2	<400	5.27	3.41	3.63	93.89	n/a (VL <1000)
NSC_1702	>2	<400	5.31	3.38	3.41	99.13	n/a (VL <1000)
NSC_1703	>2	<400	5.9	3.37	3.37	99.82	n/a (VL <1000)
NSC_1704	>2	<400	5.26	3.43	3.34	102.66	n/a (VL <1000)
NSC_1705	>2	<400	6.38	3.32	3.34	99.56	n/a (VL <1000)
NSC_1706	>2	<400	2.81	3.32	3.55	93.46	n/a (VL <1000)
NSC_1707	>2	<400	5.19	3.39	3.56	95.23	n/a (VL <1000)
NSC_1708	>2	<400	5.43	3.41	3.37	101.03	n/a (VL <1000)
NSC_1709	>2	<400	1.66	2.8	3.34	83.86	n/a (VL <1000)
NSC_1710	>2	<400	5.07	3.39	3.37	100.63	n/a (VL <1000)
NSC_1711	>2	<400	2.68	3.39	3.39	100	n/a (VL <1000)
NSC_1712	>2	<400	0.59	3.24	3.31	97.72	n/a (VL <1000)
NSC_1713	>2	<400	3.18	3.33	3.61	92.02	n/a (VL <1000)
NSC_1714	>2	<400	2.91	3.36	3.38	99.29	n/a (VL <1000)
NSC_1715	>2	<400	5.8	3.41	3.6	94.81	n/a (VL <1000)
NSC_1716	>2	<400	1.99	3.37	3.58	94.28	n/a (VL <1000)
NSC_1717	>2	<400	2.58	3.41	3.33	102.26	n/a (VL <1000)
NSC_1718	>2	<400	3.92	3.39	3.56	95.1	n/a (VL <1000)
NSC_1719	>2	<400	1.55	3.32	3.39	98.02	n/a (VL <1000)
NSC_1720	>2	<400	0.48	0.98	3.05	32.12	n/a (VL <1000)
NSC_1721	>2	<400	3.01	3.36	3.39	99.2	n/a (VL <1000)
NSC_1722	>2	<400	2.46	3.38	3.38	99.97	n/a (VL <1000)
NSC_1723	>2	<400	2.67	3.41	3.6	94.77	n/a (VL <1000)
NSC_1724	>2	<400	4.87	3.42	3.29	103.95	n/a (VL <1000)
NSC_1725	>2	<400	3.8	3.4	3.37	100.85	n/a (VL <1000)
NSC_1726	>2	<400	2.18	3.35	3.37	99.24	n/a (VL <1000)
NSC_1727	>2	<400	4.92	3.42	3.32	103	n/a (VL <1000)
NSC_1728	>2	<400	0.8	2.63	3.18	82.7	n/a (VL <1000)
NSC_1729	>2	<400	2.97	3.38	3.39	99.56	n/a (VL <1000)
NSC_1730	>2	<400	2.86	3.21	3.32	96.75	n/a (VL <1000)
NSC_1731	>2	<400	3.92	3.4	3.62	93.84	n/a (VL <1000)
NSC_1732	>2	<400	3.28	3.32	3.34	99.4	n/a (VL <1000)
NSC_1733	>2	<400	3.5	3.4	3.37	101	n/a (VL <1000)
NSC_1734	>2	<400	3.34	3.34	3.62	92.23	n/a (VL <1000)
NSC_1735	>2	<400	2.98	3.4	3.38	100.51	n/a (VL <1000)
NSC_1736	>2	<400	3.91	3.43	3.42	100.4	n/a (VL <1000)
NSC_1737	>2	<400	4.25	3.51	3.38	103.67	n/a (VL <1000)
NSC_1738	>2	<400	3.68	3.05	3.34	91.22	n/a (VL <1000)
NSC_1739	>2	<400	2.37	3.38	3.31	102.09	n/a (VL <1000)
NSC_1740	>2	<400	1.4	3.37	3.52	95.59	n/a (VL <1000)
NSC_1741	>2	<400	3.84	3.43	3.42	100.45	n/a (VL <1000)
NSC_1742	>2	<400	3.4	3.38	3.56	94.97	n/a (VL <1000)
NSC_1743	>2	<400	2.8	3.43	3.58	95.94	n/a (VL <1000)
NSC_1744	>2	<400	2.3	3.34	3.36	99.51	n/a (VL <1000)
NSC_1745	>2	<400	4.56	3.35	3.4	98.62	n/a (VL <1000)
NSC_1746	>2	<400	2.75	3.43	3.36	102.03	n/a (VL <1000)
NSC_1747	>2	<400	3.48	3.37	3.4	99.28	n/a (VL <1000)
NSC_1748	>2	<400	2.99	3.38	3.57	94.9	n/a (VL <1000)
NSC_1749	>2	<400	3.59	3.32	3.32	99.94	n/a (VL <1000)
NSC_1750	>2	<400	3.48	3.29	3.4	96.94	n/a (VL <1000)
NSC_1751	>2	<400	6.69	3.43	3.37	101.7	n/a (VL <1000)
NSC_1752	>2	<400	3.5	3.36	3.4	98.84	n/a (VL <1000)
NSC_1753	>2	<400	4.84	3.38	3.56	95.01	n/a (VL <1000)
NSC_1754	>2	<400	3.88	3.32	3.58	92.65	n/a (VL <1000)
NSC_1755	>2	<400	5.16	3.4	3.53	96.35	n/a (VL <1000)
NSC_1756	>2	<400	3.35	3.37	3.38	99.69	n/a (VL <1000)
NSC_1757	>2	<400	6.05	3.42	3.36	101.81	n/a (VL <1000)
NSC_1758	>2	<400	4.53	3.38	3.55	95.29	n/a (VL <1000)
NSC_1759	>2	<400	2.42	3.41	3.6	94.65	n/a (VL <1000)
NSC_1760	>2	<400	3.58	0.54	3.16	16.96	n/a (VL <1000)
NSC_1761	>2	<400	5.36	3.39	3.36	100.81	n/a (VL <1000)
NSC_1762	>2	<400	0.19	0.78	1.28	60.85	n/a (VL <1000)
NSC_1763	>2	<400	1.67	3.15	3.37	93.44	n/a (VL <1000)
NSC_1764	>2	<400	1.38	2.38	3.28	72.62	n/a (VL <1000)
NSC_1765	>2	<400	3.47	3.38	3.39	99.51	n/a (VL <1000)
NSC_1766	>2	<400	3.01	3.23	3.28	98.49	n/a (VL <1000)
NSC_1767	>2	<400	4.91	3.34	3.33	100.37	n/a (VL <1000)
NSC_1768	>2	<400	4.79	3.38	3.6	93.94	n/a (VL <1000)
NSC_1769	>2	<400	4.95	3.45	3.37	102.38	n/a (VL <1000)
NSC_1770	>2	<400	3.29	3.33	3.36	99.1	n/a (VL <1000)
NSC_1771	>2	<400	2.81	3.31	3.32	99.59	n/a (VL <1000)
NSC_1772	>2	<400	2.29	3.26	3.34	97.36	n/a (VL <1000)
NSC_1773	>2	<400	0.74	0.23	0.39	59.95	n/a (VL <1000)
NSC_1774	>2	<400	2.46	2.98	3.27	91.19	n/a (VL <1000)
NSC_1775	>2	<400	5.02	3.49	3.37	103.77	n/a (VL <1000)
NSC_1776	>2	<400	3.83	3.33	3.55	93.75	n/a (VL <1000)
NSC_1777	>2	<400	4.15	3.38	3.35	100.9	n/a (VL <1000)
NSC_1778	>2	<400	4.26	3.47	3.36	103.21	n/a (VL <1000)
NSC_1779	>2	<400	1.01	3.09	3.31	93.54	n/a (VL <1000)
NSC_1780	>2	<400	3.48	3.17	3.28	96.55	n/a (VL <1000)
NSC_1781	>2	<400	2.44	0.6	1.92	31.22	n/a (VL <1000)
NSC_1782	>2	<400	2.02	3.19	3.27	97.63	n/a (VL <1000)
NSC_1783	>2	<400	3.4	3.4	3.35	101.67	n/a (VL <1000)
NSC_1784	>2	<400	2.84	2.98	3.52	84.59	n/a (VL <1000)
NSC_1785	>2	<400	1.5	3.4	3.31	102.77	n/a (VL <1000)
NSC_1786	>2	<400	3.58	3.36	3.39	99.15	n/a (VL <1000)
NSC_1787	>2	<400	1.7	1.62	3.02	53.56	n/a (VL <1000)
NSC_1788	>2	<400	2.24	3.43	3.64	94.06	n/a (VL <1000)
NSC_1789	>2	<400	4.81	3.41	3.42	99.73	n/a (VL <1000)
NSC_1790	>2	<400	4.19	3.29	3.32	98.99	n/a (VL <1000)
NSC_1791	>2	<400	3.76	3.43	3.39	100.92	n/a (VL <1000)
NSC_1792	>2	<400	4.27	3.42	3.35	102.13	n/a (VL <1000)
NSC_1793	>2	<400	3.81	3.36	3.59	93.69	n/a (VL <1000)
NSC_1794	>2	<400	0.98	3.36	3.57	93.99	n/a (VL <1000)
NSC_1795	>2	<400	0.49	1.32	2.88	45.95	n/a (VL <1000)
NSC_1796	>2	<400	5.85	3.41	3.63	93.81	n/a (VL <1000)
NSC_1797	>2	<400	2.38	2.95	3.2	92.3	n/a (VL <1000)
NSC_1798	>2	<400	2.03	3.43	3.41	100.53	n/a (VL <1000)
NSC_1799	>2	<400	5.65	3.45	3.35	102.79	n/a (VL <1000)
NSC_1800	>2	<400	3.92	3.36	3.41	98.51	n/a (VL <1000)
NSC_1801	>2	<400	2.41	1.93	3.02	63.95	n/a (VL <1000)
NSC_1802	>2	<400	3.99	3.32	3.32	99.93	n/a (VL <1000)
NSC_1803	>2	<400	4.72	3.33	3.37	98.75	n/a (VL <1000)
NSC_1804	>2	<400	4.36	3.38	3.3	102.22	n/a (VL <1000)
NSC_1805	>2	<400	5.51	3.34	3.36	99.59	n/a (VL <1000)
NSC_1806	>2	<400	1.34	3.11	3.21	96.73	n/a (VL <1000)
NSC_1807	>2	<400	3.94	3.36	3.59	93.64	n/a (VL <1000)
NSC_1808	>2	<400	3.03	3.34	3.4	98.24	n/a (VL <1000)
NSC_1809	>2	<400	5.48	3.29	3.33	98.81	n/a (VL <1000)
NSC_1810	>2	<400	5.11	3.25	3.59	90.46	n/a (VL <1000)
NSC_1811	>2	<400	4.98	3.32	3.33	99.58	n/a (VL <1000)
NSC_1812	>2	<400	2.56	3.32	3.35	99.15	n/a (VL <1000)
NSC_1813	>2	<400	5.79	3.44	3.34	102.88	n/a (VL <1000)
NSC_1814	>2	<400	3.63	3.33	3.37	98.89	n/a (VL <1000)
NSC_1815	>2	<400	1.51	3.36	3.33	100.68	n/a (VL <1000)
NSC_1816	>2	<400	4.07	3.37	3.59	93.93	n/a (VL <1000)
NSC_1817	>2	<400	4.69	3.47	3.38	102.63	n/a (VL <1000)
NSC_1818	>2	<400	4.15	3.4	3.58	94.98	n/a (VL <1000)
NSC_1819	>2	<400	2.26	3.32	3.32	100.17	n/a (VL <1000)
NSC_1820	>2	<400	2.47	1.13	3.16	35.67	n/a (VL <1000)
NSC_1821	>2	<400	4.56	3.41	3.43	99.36	n/a (VL <1000)
NSC_1822	>2	<400	4.81	3.53	3.43	103.13	n/a (VL <1000)
NSC_1823	>2	<400	4.38	3.46	3.35	103.18	n/a (VL <1000)
NSC_1824	>2	<400	3.14	3.44	3.41	100.67	n/a (VL <1000)
NSC_1825	>2	<400	2.8	3.32	3.31	100.55	n/a (VL <1000)
NSC_1826	>2	<400	5.38	3.33	3.36	99	n/a (VL <1000)
NSC_1827	>2	<400	5.56	3.33	3.37	98.77	n/a (VL <1000)
NSC_1828	>2	<400	2.93	3.4	3.43	99.23	n/a (VL <1000)
NSC_1829	>2	<400	6.61	3.43	3.31	103.77	n/a (VL <1000)
NSC_1830	>2	<400	2.94	3.44	3.34	102.93	n/a (VL <1000)
NSC_1831	>2	<400	5.49	3.45	3.38	102.14	n/a (VL <1000)
NSC_1832	>2	<400	2.39	2.99	3.49	85.61	n/a (VL <1000)
NSC_1833	>2	<400	0.32	3.39	3.61	93.97	n/a (VL <1000)
NSC_1834	>2	<400	5.59	3.44	3.4	101.08	n/a (VL <1000)
NSC_1835	>2	<400	5.21	3.34	3.34	100.02	n/a (VL <1000)
NSC_1836	>2	<400	4.81	3.29	3.34	98.4	n/a (VL <1000)
NSC_1837	>2	<400	0.43	2.62	3.08	85.12	n/a (VL <1000)
NSC_1838	>2	<400	4.72	3.41	3.39	100.51	n/a (VL <1000)
NSC_1839	>2	<400	5.61	3.35	3.37	99.49	n/a (VL <1000)
NSC_1840	>2	<400	2.89	3.4	3.31	102.74	n/a (VL <1000)
NSC_1841	>2	<400	5.08	3.41	3.34	102.1	n/a (VL <1000)
NSC_1842	>2	<400	4.29	3.38	3.6	93.87	n/a (VL <1000)
NSC_1843	>2	<400	4.35	3.37	3.39	99.52	n/a (VL <1000)
NSC_1844	>2	<400	3.81	3.23	3.34	96.67	n/a (VL <1000)
NSC_1845	>2	<400	2.22	3.35	3.61	92.82	n/a (VL <1000)
NSC_1846	>2	<400	3.28	3.38	3.37	100.24	n/a (VL <1000)
NSC_1847	>2	<400	4.39	3.44	3.38	101.92	n/a (VL <1000)
NSC_1848	>2	<400	1.9	3.17	3.44	92.21	n/a (VL <1000)
NSC_1849	>2	<400	0.55	1.96	2.42	81.07	n/a (VL <1000)
NSC_1850	>2	<400	5.63	3.34	3.36	99.57	n/a (VL <1000)
NSC_1851	>2	<400	3.43	3.12	3.54	88.3	n/a (VL <1000)
NSC_1852	>2	<400	2.01	3.4	3.3	102.81	n/a (VL <1000)
NSC_1853	>2	<400	3.44	3.34	3.4	98.27	n/a (VL <1000)
NSC_1854	>2	<400	4.37	3.45	3.36	102.63	n/a (VL <1000)
NSC_1855	>2	<400	2.19	3.31	3.54	93.34	n/a (VL <1000)
NSC_1856	>2	<400	4.79	3.42	3.4	100.41	n/a (VL <1000)
NSC_1857	>2	<400	2.11	3.36	3.59	93.8	n/a (VL <1000)
NSC_1858	>2	<400	2.87	3.37	3.35	100.76	n/a (VL <1000)
NSC_1859	>2	<400	2.84	3.04	3.16	96.27	n/a (VL <1000)
NSC_1860	>2	<400	3.82	3.2	3.29	97.12	n/a (VL <1000)
NSC_1861	>2	<400	2.16	3.3	3.38	97.51	n/a (VL <1000)
NSC_1862	>2	<400	4.17	3.31	3.31	100.18	n/a (VL <1000)
NSC_1863	>2	<400	3.76	3.34	3.33	100.48	n/a (VL <1000)
NSC_1864	>2	<400	4.87	3.45	3.37	102.33	n/a (VL <1000)
NSC_1865	>2	<400	4.04	3.34	3.35	99.93	n/a (VL <1000)
NSC_1866	>2	<400	4.22	3.39	3.59	94.21	n/a (VL <1000)
NSC_1867	>2	<400	3.65	3.4	3.34	101.81	n/a (VL <1000)
NSC_1868	>2	<400	1.67	2.43	3.14	77.49	n/a (VL <1000)
NSC_1869	>2	<400	3.82	3.36	3.4	98.75	n/a (VL <1000)
NSC_1870	>2	<400	0.57	2.56	3.4	75.25	n/a (VL <1000)
NSC_1871	>2	<400	4.1	3.33	3.3	101.02	n/a (VL <1000)
NSC_1872	>2	<400	3.62	3.45	3.41	101.36	n/a (VL <1000)
NSC_1873	>2	<400	1.36	3.3	3.3	100.26	n/a (VL <1000)
NSC_1874	>2	<400	3.77	3.22	3.27	98.4	n/a (VL <1000)
NSC_1875	>2	<400	4	3.25	3.56	91.17	n/a (VL <1000)
NSC_1876	>2	<400	5.91	3.4	3.62	93.95	n/a (VL <1000)
NSC_1877	>2	<400	6.02	3.36	3.58	93.93	n/a (VL <1000)
NSC_1878	>2	<400	3.08	3.18	3.29	96.74	n/a (VL <1000)
NSC_1879	>2	<400	2.68	2.11	3.62	58.42	n/a (VL <1000)
NSC_1880	>2	<400	0.93	3.21	3.33	96.56	n/a (VL <1000)
NSC_1881	>2	<400	3.47	3.15	3.34	94.45	n/a (VL <1000)
NSC_1882	>2	<400	4.56	3.39	3.56	95.4	n/a (VL <1000)
NSC_1883	>2	<400	4.93	3.35	3.36	99.69	n/a (VL <1000)
NSC_1884	>2	<400	4.53	3.47	3.37	102.96	n/a (VL <1000)
NSC_1885	>2	<400	0.09	0.19	0.18	108.52	n/a (VL <1000)
NSC_1886	>2	<400	0.25	2.25	2.81	80.02	n/a (VL <1000)
NSC_1887	>2	<400	6.1	3.44	3.41	100.64	n/a (VL <1000)
NSC_1888	>2	<400	3.11	3.42	3.56	95.99	n/a (VL <1000)
NSC_1889	>2	<400	0.16	0.15	0.14	105.81	n/a (VL <1000)
NSC_1890	>2	<400	2.47	3.39	3.62	93.7	n/a (VL <1000)
NSC_1891	>2	<400	3.38	3.35	3.31	101.22	n/a (VL <1000)
NSC_1892	>2	<400	2.8	2.7	3.58	75.37	n/a (VL <1000)
NSC_1893	>2	<400	2.27	3.36	3.38	99.33	n/a (VL <1000)
NSC_1894	>2	<400	3.4	3.4	3.38	100.5	n/a (VL <1000)
NSC_1895	>2	<400	6.05	3.35	3.56	93.93	n/a (VL <1000)
NSC_1896	>2	<400	2.86	3.39	3.38	100.4	n/a (VL <1000)
NSC_1897	>2	<400	3.05	3.37	3.59	93.79	n/a (VL <1000)
NSC_1898	>2	<400	3.66	2.71	3.25	83.29	n/a (VL <1000)
NSC_1899	>2	<400	5.67	3.43	3.64	94.4	n/a (VL <1000)
NSC_1900	>2	<400	5.03	3.37	3.4	99.34	n/a (VL <1000)
NSC_1901	>2	<400	2.3	2.71	3.5	77.54	n/a (VL <1000)
NSC_1902	>2	<400	4.98	3.37	3.4	99.04	n/a (VL <1000)
NSC_1903	>2	<400	4.76	3.46	3.38	102.55	n/a (VL <1000)
NSC_1904	>2	<400	2.12	3.36	3.53	95.22	n/a (VL <1000)
NSC_1905	>2	<400	3.57	3.36	3.54	94.87	n/a (VL <1000)
NSC_1906	>2	<400	5.94	3.36	3.64	92.48	n/a (VL <1000)
NSC_1907	>2	<400	3.61	3.47	3.32	104.42	n/a (VL <1000)
NSC_1908	>2	<400	2.81	3.46	3.38	102.32	n/a (VL <1000)
NSC_1909	>2	<400	2.82	3.37	3.54	95.25	n/a (VL <1000)
NSC_1910	>2	<400	1.48	3.39	3.6	94.19	n/a (VL <1000)
NSC_1911	>2	<400	5.7	3.45	3.43	100.64	n/a (VL <1000)
NSC_1912	>2	<400	1.9	2.91	3.37	86.22	n/a (VL <1000)
NSC_1913	>2	<400	4.24	3.4	3.41	99.65	n/a (VL <1000)
NSC_1914	>2	<400	4.04	3.4	3.65	93.17	n/a (VL <1000)
NSC_1915	>2	<400	4.11	3.38	3.39	99.73	n/a (VL <1000)
NSC_1916	>2	<400	4.2	3.4	3.36	101.06	n/a (VL <1000)
NSC_1917	>2	<400	3.12	3.37	3.55	94.9	n/a (VL <1000)
NSC_1918	>2	<400	2.84	3.46	3.32	103.97	n/a (VL <1000)
NSC_1919	>2	<400	5.59	3.42	3.6	94.88	n/a (VL <1000)
NSC_1920	>2	<400	1.69	3.28	3.54	92.67	n/a (VL <1000)
NSC_1921	>2	<400	5.38	3.42	3.39	100.89	n/a (VL <1000)
NSC_1922	>2	<400	2.98	3.39	3.44	98.7	n/a (VL <1000)
NSC_1923	>2	<400	4.86	3.4	3.59	94.67	n/a (VL <1000)
NSC_1924	>2	<400	4.16	3.34	3.58	93.46	n/a (VL <1000)
NSC_1925	>2	<400	3.17	3.29	3.29	100.03	n/a (VL <1000)
NSC_1926	>2	<400	4.49	3.42	3.41	100.46	n/a (VL <1000)
NSC_1927	>2	<400	2.83	3.34	3.37	99.15	n/a (VL <1000)
NSC_1928	>2	<400	4.2	3.32	3.35	99.03	n/a (VL <1000)
NSC_1929	>2	<400	3.36	3.45	3.32	103.74	n/a (VL <1000)
NSC_1930	>2	<400	1.22	2.52	3.1	81.27	n/a (VL <1000)
NSC_1931	>2	<400	3.57	3.33	3.36	99.39	n/a (VL <1000)
NSC_1932	>2	<400	3.27	3.44	3.36	102.51	n/a (VL <1000)
NSC_1933	>2	<400	3.17	3.41	3.65	93.5	n/a (VL <1000)
NSC_1934	>2	<400	5.21	3.43	3.33	102.87	n/a (VL <1000)
NSC_1935	>2	<400	4.95	3.4	3.41	99.61	n/a (VL <1000)
NSC_1936	>2	<400	2	3.35	3.34	100.13	n/a (VL <1000)
NSC_1937	>2	<400	5.28	3.37	3.61	93.42	n/a (VL <1000)
NSC_1938	>2	<400	6.19	3.37	3.35	100.67	n/a (VL <1000)
NSC_1939	>2	<400	6.61	3.43	3.33	102.82	n/a (VL <1000)
NSC_1940	>2	<400	4.31	3.37	3.38	99.53	n/a (VL <1000)
NSC_1941	>2	<400	2.31	3.32	3.33	99.59	n/a (VL <1000)
NSC_1942	>2	<400	5.07	3.39	3.34	101.58	n/a (VL <1000)
NSC_1943	>2	<400	3.1	3.27	3.33	98.04	n/a (VL <1000)
NSC_1944	>2	<400	0.76	3.08	3.21	96.05	n/a (VL <1000)
NSC_1945	>2	<400	6.32	3.4	3.6	94.33	n/a (VL <1000)
NSC_1946	>2	<400	0.91	3.41	3.61	94.45	n/a (VL <1000)
NSC_1947	>2	<400	4.9	3.39	3.4	99.75	n/a (VL <1000)
NSC_1948	>2	<400	4.69	3.37	3.53	95.43	n/a (VL <1000)
NSC_1949	>2	<400	4	3.34	3.58	93.46	n/a (VL <1000)
NSC_1950	>2	<400	2.18	3.36	3.37	99.5	n/a (VL <1000)
NSC_1951	>2	<400	3.56	3.34	3.32	100.53	n/a (VL <1000)
NSC_1952	>2	<400	2.62	3.4	3.6	94.55	n/a (VL <1000)
NSC_1953	>2	<400	2.68	3.37	3.38	99.44	n/a (VL <1000)
NSC_1954	>2	<400	4.72	3.41	3.6	94.6	n/a (VL <1000)
NSC_1955	>2	<400	5.23	3.39	3.43	98.68	n/a (VL <1000)
NSC_1956	>2	<400	6.45	3.41	3.63	93.75	n/a (VL <1000)
NSC_1957	>2	<400	2.17	3.39	3.4	99.56	n/a (VL <1000)
NSC_1958	>2	<400	6.14	3.45	3.43	100.74	n/a (VL <1000)
NSC_1959	>2	<400	1.18	3.24	3.33	97.2	n/a (VL <1000)
NSC_1960	>2	<400	3.08	3.44	3.35	102.67	n/a (VL <1000)
NSC_1961	>2	<400	1.65	3.31	3.38	98.16	n/a (VL <1000)
NSC_1962	>2	<400	4.19	3.39	3.65	93.06	n/a (VL <1000)
NSC_1963	>2	<400	3.26	3.35	3.4	98.47	n/a (VL <1000)
NSC_1964	>2	<400	3.36	3.38	3.43	98.61	n/a (VL <1000)
NSC_1965	>2	<400	2.91	3.47	3.34	103.79	n/a (VL <1000)
NSC_1966	>2	<400	3.26	3.42	3.64	94.05	n/a (VL <1000)
NSC_1967	>2	<400	3.69	3.37	3.62	93.24	n/a (VL <1000)
NSC_1968	>2	<400	3.99	3.37	3.36	100.28	n/a (VL <1000)
NSC_1969	>2	<400	2.86	3.44	3.36	102.55	n/a (VL <1000)
NSC_1970	>2	<400	1.72	2.75	3.28	83.75	n/a (VL <1000)
NSC_1971	>2	<400	5.06	3.47	3.38	102.45	n/a (VL <1000)
NSC_1972	>2	<400	3.25	3.36	3.38	99.41	n/a (VL <1000)
NSC_1973	>2	<400	4.68	3.44	3.35	102.66	n/a (VL <1000)
NSC_1974	>2	<400	2.94	3.36	3.59	93.66	n/a (VL <1000)
NSC_1975	>2	<400	3.06	3.36	3.39	99.1	n/a (VL <1000)
NSC_1976	>2	<400	1.32	3.33	3.3	100.99	n/a (VL <1000)
NSC_1977	>2	<400	3.62	3.22	3.3	97.73	n/a (VL <1000)
NSC_1978	>2	<400	6.36	3.39	3.6	94.11	n/a (VL <1000)
NSC_1979	>2	<400	4.17	3.38	3.64	92.74	n/a (VL <1000)
NSC_1980	>2	<400	1.79	3.28	3.33	98.52	n/a (VL <1000)
NSC_1981	>2	<400	5.42	3.35	3.35	99.99	n/a (VL <1000)
NSC_1982	>2	<400	6.48	3.36	3.61	93.09	n/a (VL <1000)
NSC_1983	>2	<400	4.46	3.38	3.59	94.14	n/a (VL <1000)
NSC_1984	>2	<400	3.55	3.43	3.32	103.36	n/a (VL <1000)
NSC_1985	>2	<400	2.63	3.42	3.34	102.33	n/a (VL <1000)
NSC_1986	>2	<400	4.61	3.39	3.33	101.66	n/a (VL <1000)
NSC_1987	>2	<400	4.38	3.3	3.35	98.43	n/a (VL <1000)
NSC_1988	>2	<400	5.82	3.44	3.41	100.99	n/a (VL <1000)
NSC_1989	>2	<400	3.77	3.36	3.37	99.5	n/a (VL <1000)
NSC_1990	>2	<400	0.64	3.26	3.28	99.41	n/a (VL <1000)
NSC_1991	>2	<400	4.93	3.37	3.34	100.93	n/a (VL <1000)
NSC_1992	>2	<400	6.19	3.37	3.37	100.1	n/a (VL <1000)
NSC_1993	>2	<400	1.38	3.15	3.31	95.13	n/a (VL <1000)
NSC_1994	>2	<400	4.39	3.1	3.53	87.83	n/a (VL <1000)
NSC_1995	>2	<400	4.87	3.39	3.54	95.85	n/a (VL <1000)
NSC_1996	>2	<400	3.79	3.35	3.59	93.24	n/a (VL <1000)
NSC_1997	>2	<400	3.6	3.42	3.34	102.62	n/a (VL <1000)
NSC_1998	>2	<400	0.99	1.81	2.98	60.77	n/a (VL <1000)
NSC_1999	>2	<400	3.21	3.36	3.33	100.97	n/a (VL <1000)
[truncated: 2,397 more rows]
